# Supplementary material for: Human genetics implicates a BACH2-NRF2 axis in fetal hemoglobin activation
Source: bioRxiv or medRxiv preprint supplement (doi:10.1101/2023.03.24.23287659), 2025-12-26
Supplement: Supplementary file [file media-1.pdf]

| Supplementary Table 1. Windows created based on whole-cohort meta-analysis conditionally independent signals. |     |              |            |             |            |                |  |
|---------------------------------------------------------------------------------------------------------------|-----|--------------|------------|-------------|------------|----------------|--|
| publication_windowname                                                                                        | chr | window_start | window_end | plevel      | min-pvalue | old_windowname |  |
| chr11p15.4                                                                                                    | 11  | 4823396      | 5823396    | significant | 6.46E-185  | HBB            |  |
| chr14q21.1                                                                                                    | 14  | 37516989     | 38516989   | suggestive  | 3.08E-07   | LINC00517      |  |
| chr17p13.1                                                                                                    | 17  | 7790253      | 8790253    | significant | 1.02E-13   | CTC1;KRBA2     |  |
| chr19p13.3                                                                                                    | 19  | 3548207      | 4548207    | significant | 9.47E-09   | ZBTB7A         |  |
| chr19p13.2-p13.13                                                                                             | 19  | 11298757     | 12298757   | suggestive  | 1.31E-07   | KLF1           |  |
| chr19p13.2                                                                                                    | 19  | 12405805     | 13405805   | significant | 6.17E-15   | ZNF491         |  |
| chr2p16.1-p15                                                                                                 | 2   | 60119313     | 61119313   | significant | 1.00E-300  | BCL11A         |  |
| chr2p16.1-p15_2                                                                                               | 2   | 60854299     | 61854299   | significant | 2.26E-10   | USP34          |  |
| chr2q11.2                                                                                                     | 2   | 99523649     | 100523649  | significant | 1.01E-09   | AFF3           |  |
| chr5p13.1                                                                                                     | 5   | 38636054     | 39636054   | suggestive  | 5.64E-07   | FYB1           |  |
| chr5q14.3                                                                                                     | 5   | 87301921     | 88301921   | suggestive  | 5.29E-07   | LINC02144      |  |
| chr6q15                                                                                                       | 6   | 88658311     | 89658311   | suggestive  | 4.67E-07   | PM20D2         |  |
| chr6q15_2                                                                                                     | 6   | 89708235     | 90708235   | significant | 7.54E-11   | BACH2          |  |
| chr6q23.2-q23.3                                                                                               | 6   | 134533050    | 135533050  | significant | 1.00E-300  | HBS1L-MYB      |  |

**Supplementary Table 2. Conditionally-independent identified signals from whole-cohort meta-analysis.**

| Chr | SNP         | bp       | refA | freq   | b           | se         | p           | n       | freq_gen   | bj         | bj_se     | pj        | LD_r        |
|-----|-------------|----------|------|--------|-------------|------------|-------------|---------|------------|------------|-----------|-----------|-------------|
| 19  | rs10426955  | 3962371  | A    | 0.8351 | -0.00764269 | 0.0118858  | 0.520218    | 25700.3 | 0.860741   | -0.108414  | 0.0155757 | 3.39E-12  | 0.619308    |
| 19  | rs892128    | 3975489  | G    | 0.2183 | 0.0374159   | 0.0106736  | 0.000455831 | 25706.3 | 0.797741   | 0.382794   | 0.0222733 | 3.37E-66  | 0.0683899   |
| 19  | rs74172614  | 3987204  | A    | 0.0154 | -0.0265324  | 0.0362955  | 0.464772    | 25030.4 | 0.0165916  | -0.22701   | 0.040229  | 1.67E-08  | 0.183476    |
| 19  | rs2084109   | 4019960  | A    | 0.2952 | 0.0288462   | 0.00989145 | 0.0035423   | 24553.4 | 0.320992   | 0.282048   | 0.0179066 | 6.75E-56  | -0.755956   |
| 19  | rs12460140  | 4033616  | G    | 0.2627 | 0.0369957   | 0.00975743 | 0.000149717 | 27099.2 | 0.763218   | 0.513657   | 0.0248172 | 3.64E-95  | -0.773931   |
| 19  | rs75366827  | 4042810  | C    | 0.1437 | 0.0590777   | 0.0122388  | 1.39E-06    | 27103.7 | 0.164522   | 0.997514   | 0.0347747 | 5.86E-181 | 0.0949566   |
| 19  | rs11882361  | 4042860  | G    | 0.068  | 0.0121842   | 0.0170644  | 0.475221    | 27092.3 | 0.95868    | -0.348747  | 0.0251941 | 1.41E-43  | 0.0424842   |
| 19  | rs59208569  | 4044426  | G    | 0.2196 | 0.0456633   | 0.0107905  | 2.32E-05    | 25039.1 | 0.816753   | 0.434875   | 0.0229    | 2.06E-80  | 0.0745309   |
| 19  | rs74178436  | 4053181  | T    | 0.0146 | -0.068139   | 0.0508094  | 0.179898    | 13460.7 | 0.0319224  | -0.436879  | 0.0539828 | 5.83E-16  | 0.0386861   |
| 19  | rs895331    | 4060224  | C    | 0.0954 | -0.0229234  | 0.0189756  | 0.22703     | 16089.4 | 0.948411   | -0.159646  | 0.0203324 | 4.10E-15  | 0.225099    |
| 19  | rs191258216 | 4065417  | G    | 0.2903 | 0.0293083   | 0.0144788  | 0.0429472   | 11572.9 | 0.730137   | 0.232921   | 0.0197421 | 3.99E-32  | -0.738795   |
| 19  | rs7259699   | 4072148  | A    | 0.1891 | 0.0645909   | 0.011253   | 9.47E-09    | 25716.6 | 0.174311   | 0.378582   | 0.0209577 | 6.11E-73  | 0.0717094   |
| 19  | rs350821    | 4083971  | G    | 0.0772 | -0.0154895  | 0.0213349  | 0.467828    | 15418.9 | 0.973711   | -0.262569  | 0.0242947 | 3.17E-27  | 0.24961     |
| 19  | rs350819    | 4085103  | T    | 0.7647 | 0.0454359   | 0.0101219  | 7.16E-06    | 27102.1 | 0.770581   | 0.519447   | 0.0238242 | 2.16E-105 | -0.832979   |
| 19  | rs11671735  | 4107670  | A    | 0.2576 | 0.032333    | 0.00982061 | 0.000993505 | 27097.5 | 0.270707   | 0.307544   | 0.0213393 | 4.34E-47  | 0.238665    |
| 19  | rs141336437 | 4107968  | G    | 0.9829 | -0.0579192  | 0.0348687  | 0.0967006   | 24464.6 | 0.0209984  | -0.415466  | 0.0414265 | 1.14E-23  | -0.0706858  |
| 19  | rs11666488  | 4120925  | C    | 0.168  | 0.0821033   | 0.0174046  | 2.39E-06    | 11787   | 0.180588   | 0.24195    | 0.0227354 | 1.90E-26  | 0.00305622  |
| 19  | rs138190746 | 11378113 | G    | 0.994  | 0.564643    | 0.114978   | 9.07E-07    | 6318.21 | 0.00117369 | 0.583735   | 0.115282  | 4.12E-07  | 0.0615963   |
| 19  | rs286234    | 11798757 | A    | 0.2046 | 0.0315827   | 0.0109311  | 0.00386146  | 25704.3 | 0.166517   | 0.0542125  | 0.0110083 | 8.45E-07  | 0.00768549  |
| 19  | rs62113566  | 12513936 | T    | 0.0629 | 0.066762    | 0.0179105  | 0.000193369 | 26429   | 0.0589144  | 0.0981182  | 0.0187408 | 1.64E-07  | -0.0373328  |
| 19  | rs28728275  | 12654008 | T    | 0.0345 | 0.0413594   | 0.0244865  | 0.091207    | 25031.6 | 0.0185964  | -0.247241  | 0.0280578 | 1.23E-18  | 0.0584434   |
| 19  | rs1205171   | 12800526 | A    | 0.8222 | 0.045402    | 0.0112308  | 5.29E-05    | 27100.2 | 0.827684   | 0.848677   | 0.0321834 | 3.02E-153 | 0.0976758   |
| 19  | rs28379625  | 12831272 | T    | 0.046  | 0.0141206   | 0.0207653  | 0.496499    | 26422.3 | 0.0418883  | -0.61305   | 0.0356886 | 3.90E-66  | 0.380534    |
| 19  | rs3745648   | 12832824 | C    | 0.2446 | 0.0479617   | 0.00998773 | 1.57E-06    | 27103.6 | 0.22644    | 0.659158   | 0.0302292 | 2.07E-105 | -0.00722159 |
| 19  | rs4804210   | 12879166 | G    | 0.7367 | 0.0661925   | 0.0106681  | 5.48E-10    | 22610.5 | 0.00111022 | 0.0966835  | 0.0107013 | 1.64E-19  | -0.00769153 |
| 19  | rs3817621   | 12887391 | C    | 0.2378 | 0.061018    | 0.0100805  | 1.42E-09    | 27110.4 | 0.234445   | 0.193547   | 0.0166994 | 4.63E-31  | -0.410141   |
| 19  | rs11085824  | 12890733 | G    | 0.6845 | -0.0719885  | 0.00922877 | 6.17E-15    | 27122.5 | 0.359849   | -1.30953   | 0.0290111 | 0         | 0.0793316   |
| 19  | rs137887367 | 12912683 | T    | 0.0099 | -0.0802665  | 0.0481482  | 0.0955002   | 22000.7 | 0.00998631 | -0.522241  | 0.0493708 | 3.77E-26  | -0.0292843  |
| 19  | rs73004683  | 12923308 | A    | 0.0757 | -0.0724593  | 0.0166656  | 1.37E-05    | 25709.6 | 0.0762543  | -0.163856  | 0.0183466 | 4.22E-19  | -0.38512    |
| 19  | rs2965220   | 12942311 | T    | 0.6788 | -0.0695367  | 0.00918574 | 3.73E-14    | 27120.7 | 0.650697   | -1.41089   | 0.0288817 | 0         | 0.133553    |
| 19  | rs7395      | 12953508 | T    | 0.0482 | 0.0944223   | 0.0202972  | 3.29E-06    | 26432.9 | 0.0333301  | 0.138049   | 0.0209815 | 4.72E-11  | 0.00156976  |
| 19  | rs183437571 | 13011085 | T    | 0.0081 | 0.405819    | 0.0816467  | 6.68E-07    | 9311.35 | 0.00103667 | 0.407017   | 0.0818048 | 6.51E-07  | 0.010743    |
| 19  | rs7256409   | 13106891 | C    | 0.2707 | -0.0351271  | 0.0144298  | 0.0149187   | 12157.8 | 0.748135   | -0.0926512 | 0.014825  | 4.11E-10  | 0           |
| 5   | rs453157    | 39119929 | A    | 0.9072 | 0.0740256   | 0.0147957  | 5.64E-07    | 27104.6 | 0.938318   | 0.880283   | 0.0393673 | 9.49E-111 | -0.295097   |
| 5   | rs78523549  | 39140221 | A    | 0.0084 | 0.0123475   | 0.0614293  | 0.840696    | 15907.7 | 0.00587798 | 0.896729   | 0.0729734 | 1.05E-34  | -0.0217436  |
| 5   | rs16868193  | 39152178 | T    | 0.075  | 0.060936    | 0.0163039  | 0.000185847 | 27099   | 0.0557273  | 0.932625   | 0.0422545 | 5.92E-108 | 0           |
| 5   | rs57811114  | 87801921 | T    | 0.016  | 0.199094    | 0.0396948  | 5.29E-07    | 20130   | 0.0129986  | 0.199094   | 0.0397186 | 5.37E-07  | 0           |
| 17  | rs56067341  | 8128637  | T    | 0.892  | 0.0305225   | 0.0142089  | 0.0317044   | 25702.4 | 0.109283   | 0.264146   | 0.0179438 | 4.75E-49  | 0.155556    |
| 17  | rs78508422  | 8138779  | A    | 0.018  | 0.137637    | 0.0421477  | 0.00109233  | 15913   | 0.0176734  | 0.403731   | 0.0443407 | 8.61E-20  | -0.0374219  |
| 17  | rs4792594   | 8217305  | T    | 0.9396 | 0.0981015   | 0.0180183  | 5.19E-08    | 27106.9 | 0.0569911  | 0.497007   | 0.0250857 | 2.33E-87  | -0.247438   |

|    |             |           |   |        |             |            |             |         |            |            |            |           |            |
|----|-------------|-----------|---|--------|-------------|------------|-------------|---------|------------|------------|------------|-----------|------------|
| 17 | rs8078338   | 8225842   | G | 0.558  | -0.0538143  | 0.00874992 | 7.74E-10    | 26441   | 0.496792   | -0.826495  | 0.0246332  | 8.39E-247 | -0.595019  |
| 17 | rs7503199   | 8230957   | T | 0.2831 | -0.00233631 | 0.00953587 | 0.806455    | 27092.1 | 0.265846   | -0.777057  | 0.0244959  | 7.76E-221 | -0.142272  |
| 17 | rs62063135  | 8244427   | A | 0.0683 | 0.046775    | 0.0170263  | 0.00601034  | 27095.8 | 0.0494895  | 0.493656   | 0.024148   | 6.94E-93  | -0.449176  |
| 17 | rs9891699   | 8253992   | C | 0.2311 | 0.075685    | 0.0101756  | 1.02E-13    | 27119.7 | 0.796538   | 1.25244    | 0.0292275  | 0         | 0.0306507  |
| 17 | rs141777945 | 8258163   | A | 0.0025 | -0.528353   | 0.124654   | 2.25E-05    | 12885.8 | 0.00257213 | -0.753536  | 0.129044   | 5.24E-09  | 0.346719   |
| 17 | rs74873709  | 8266696   | A | 0.0256 | -0.0222411  | 0.0286239  | 0.437151    | 24463.5 | 0.0209788  | -0.510463  | 0.0335134  | 2.18E-52  | -0.047388  |
| 17 | rs73975815  | 8295101   | T | 0.1165 | 0.0606095   | 0.0133828  | 5.93E-06    | 27102.3 | 0.0928759  | 0.226189   | 0.0165755  | 2.13E-42  | 0          |
| 17 | rs147381196 | 58308282  | C | 0.994  | -1.16106    | 0.235079   | 7.85E-07    | 1493.59 | 0.00360887 | -1.16106   | 0.236913   | 9.55E-07  | 0          |
| 14 | rs112345505 | 38016989  | A | 0.0102 | 0.752578    | 0.147035   | 3.08E-07    | 2265.45 | 0.00151589 | 0.752578   | 0.14785    | 3.58E-07  | 0          |
| 6  | rs77819697  | 88733132  | C | 0.0907 | -0.0317432  | 0.0155291  | 0.0409431   | 25135.2 | 0.101567   | -0.0918714 | 0.0158839  | 7.30E-09  | 0.0456625  |
| 6  | rs6454735   | 89108537  | T | 0.7106 | 0.0342946   | 0.0094698  | 0.000292932 | 27098.6 | 0.726585   | 0.539407   | 0.0200384  | 1.33E-159 | 0.196134   |
| 6  | rs13202823  | 89110845  | A | 0.0714 | -0.0662905  | 0.0171223  | 0.000108122 | 25707.6 | 0.0908317  | -0.385387  | 0.0257828  | 1.62E-50  | -0.0582433 |
| 6  | rs149447298 | 89120822  | G | 0.9785 | 0.00324163  | 0.0311692  | 0.917168    | 24463.2 | 0.0276642  | 0.580512   | 0.0381582  | 2.89E-52  | -0.026346  |
| 6  | rs74669750  | 89170754  | A | 0.025  | -0.0251345  | 0.0286265  | 0.379935    | 25030.5 | 0.0138507  | 0.436301   | 0.0406547  | 7.21E-27  | 0.177037   |
| 6  | rs7763065   | 89177256  | G | 0.7033 | -0.048622   | 0.00964858 | 4.67E-07    | 25712.8 | 0.298648   | -0.687153  | 0.0261174  | 1.47E-152 | -0.585723  |
| 6  | rs422252    | 89183859  | G | 0.5074 | -0.0110244  | 0.00859247 | 0.199481    | 27092.9 | 0.501643   | -0.548739  | 0.020696   | 6.64E-155 | 0.330183   |
| 6  | rs881293    | 89208084  | C | 0.6798 | -0.0332607  | 0.00945053 | 0.000432429 | 25706.3 | 0.689813   | -0.426521  | 0.0175631  | 2.82E-130 | -0.223226  |
| 6  | rs112914370 | 89209546  | A | 0.0308 | -0.0306664  | 0.0261653  | 0.241186    | 24463.9 | 0.0217217  | -0.318503  | 0.036195   | 1.37E-18  | -0.0248256 |
| 6  | rs75795218  | 89244518  | G | 0.9859 | -0.0109949  | 0.0368953  | 0.765701    | 26422.1 | 0.0197074  | 0.364239   | 0.0426527  | 1.35E-17  | 0.320336   |
| 6  | rs12524354  | 89247075  | A | 0.1895 | -0.027248   | 0.0109599  | 0.0129128   | 27095.1 | 0.162947   | -0.299989  | 0.0181562  | 2.52E-61  | -0.0372783 |
| 6  | rs142400470 | 89301533  | C | 0.9878 | -0.0489759  | 0.0510682  | 0.337544    | 15908.1 | 0.0111983  | -0.322968  | 0.0523261  | 6.73E-10  | -0.0221644 |
| 6  | rs207255    | 90101895  | T | 0.5144 | -0.031744   | 0.00859224 | 0.000220321 | 27098.9 | 0.505584   | -0.902805  | 0.0261522  | 3.87E-261 | 0.906829   |
| 6  | rs207264    | 90110862  | G | 0.5236 | 0.0339235   | 0.00859781 | 7.96E-05    | 27099.8 | 0.458051   | 0.677826   | 0.0260753  | 5.64E-149 | 0.207442   |
| 6  | rs79743450  | 90144787  | C | 0.0357 | -0.0173496  | 0.023445   | 0.459293    | 26422.4 | 0.0392673  | 0.573068   | 0.0342806  | 9.86E-63  | -0.152677  |
| 6  | rs1010474   | 90147309  | C | 0.668  | 0.0593129   | 0.00911159 | 7.53E-11    | 27113.2 | 0.349732   | 0.73023    | 0.0276562  | 1.24E-153 | -0.470002  |
| 6  | rs2501720   | 90189842  | A | 0.3243 | -0.0279951  | 0.00917483 | 0.0022786   | 27096.7 | 0.297072   | 0.388606   | 0.0195199  | 3.45E-88  | -0.0570877 |
| 6  | rs3757247   | 90247744  | T | 0.4565 | 0.0397012   | 0.00861957 | 4.11E-06    | 27102.6 | 0.465112   | 0.365108   | 0.0208487  | 1.16E-68  | -0.198837  |
| 6  | rs62408228  | 90257924  | T | 0.0412 | -0.0057094  | 0.0227464  | 0.801812    | 24463.2 | 0.0429986  | 0.47315    | 0.0321064  | 3.73E-49  | 0.183495   |
| 6  | rs7754251   | 90279406  | G | 0.4433 | -0.0365124  | 0.00875234 | 3.02E-05    | 26430.8 | 0.567663   | -0.847911  | 0.0244266  | 5.09E-264 | -0.0855034 |
| 6  | rs142390812 | 90304828  | A | 0.0113 | -0.151103   | 0.0739498  | 0.0410205   | 8180.15 | 0.00579962 | -0.477471  | 0.0755019  | 2.55E-10  | 0.029399   |
| 6  | rs285642    | 90311718  | T | 0.8764 | -0.00533858 | 0.0130526  | 0.682536    | 27092.1 | 0.876039   | -0.159847  | 0.0178028  | 2.74E-19  | 0.350668   |
| 6  | rs285648    | 90313593  | G | 0.5316 | -0.0193651  | 0.00883797 | 0.0284428   | 25702.5 | 0.458327   | -0.245796  | 0.015502   | 1.28E-56  | 0.725363   |
| 6  | rs927297    | 90314575  | G | 0.351  | 0.0330343   | 0.00899751 | 0.00024114  | 27098.8 | 0.612792   | 0.321945   | 0.0180123  | 1.89E-71  | 0.14996    |
| 6  | rs10498966  | 90322375  | G | 0.9653 | -0.023079   | 0.0237679  | 0.331539    | 26422.6 | 0.0419283  | -0.299417  | 0.0280175  | 1.17E-26  | -0.14108   |
| 6  | rs9362727   | 90325363  | T | 0.3306 | -0.0184272  | 0.00913098 | 0.0435814   | 27094.1 | 0.305234   | -0.0847293 | 0.0118693  | 9.43E-13  | 0.205746   |
| 6  | rs790584    | 90382633  | A | 0.5694 | 0.0178321   | 0.00890672 | 0.0452742   | 25702.1 | 0.544315   | 0.0512042  | 0.00939864 | 5.09E-08  | 0          |
| 6  | rs2018066   | 134798780 | A | 0.9852 | -0.115571   | 0.0647373  | 0.0742243   | 8179.65 | 0.993252   | -0.500389  | 0.0657203  | 2.66E-14  | 0.0601957  |
| 6  | rs9376067   | 134814579 | C | 0.4628 | 0.0053935   | 0.00861571 | 0.53131     | 27092.2 | 0.532369   | 0.113062   | 0.0153151  | 1.55E-13  | 0.814271   |
| 6  | rs9376068   | 134820642 | C | 0.4778 | 0.0139665   | 0.00859978 | 0.104364    | 27093.4 | 0.524285   | 0.176935   | 0.0171795  | 7.10E-25  | 0.116954   |
| 6  | rs74340441  | 134823417 | T | 0.0151 | -0.0112454  | 0.0499787  | 0.821976    | 13459.8 | 0.0170077  | 0.279164   | 0.0520513  | 8.17E-08  | -0.0984329 |
| 6  | rs9402657   | 134849369 | T | 0.3176 | 0.00626056  | 0.009344   | 0.502852    | 26422.3 | 0.33675    | 1.1658     | 0.0169451  | 0         | 0.379315   |
| 6  | rs1883225   | 134851207 | G | 0.2435 | -0.109968   | 0.00997587 | 2.95E-28    | 27152.7 | 0.767379   | -1.27518   | 0.0179702  | 0         | 0.147759   |

|    |             |           |   |        |             |            |             |         |            |            |            |           |             |
|----|-------------|-----------|---|--------|-------------|------------|-------------|---------|------------|------------|------------|-----------|-------------|
| 6  | rs72560791  | 134880280 | C | 0.9018 | -0.0223752  | 0.0144351  | 0.12113     | 27093.2 | 0.0757585  | 0.542992   | 0.0192296  | 2.04E-175 | -0.158972   |
| 6  | rs9389237   | 134882641 | C | 0.7858 | 0.152914    | 0.0104092  | 7.44E-49    | 27199.8 | 0.238733   | 2.38229    | 0.0237537  | 0         | -0.114938   |
| 6  | rs117934600 | 134886643 | G | 0.9438 | 0.184132    | 0.0195769  | 5.17E-21    | 24507.4 | 0.0437883  | 0.425991   | 0.0319118  | 1.20E-40  | -0.0367954  |
| 6  | rs79393802  | 134886859 | A | 0.0291 | 0.17782     | 0.0311766  | 1.17E-08    | 18174.8 | 0.0293985  | 1.02193    | 0.0364407  | 4.77E-173 | -0.221795   |
| 6  | rs6899500   | 134905951 | T | 0.6981 | 0.181773    | 0.0093762  | 1.00E-83    | 26609.5 | 0.680943   | 2.09709    | 0.0218534  | 0         | 0.574543    |
| 6  | rs2072827   | 134932465 | A | 0.4607 | -0.086388   | 0.00859459 | 9.05E-24    | 27142.5 | 0.454899   | -0.8617    | 0.0146481  | 0         | 0.626912    |
| 6  | rs2142725   | 134937804 | T | 0.6531 | 0.127608    | 0.00897538 | 7.13E-46    | 27193   | 0.629592   | 1.25129    | 0.0222084  | 0         | 0.130764    |
| 6  | rs150736769 | 134952479 | A | 0.0322 | -0.0168     | 0.0256094  | 0.511818    | 24463.4 | 0.0291966  | -0.385459  | 0.0298212  | 3.22E-38  | -0.133829   |
| 6  | rs7768278   | 134953819 | C | 0.6608 | 0.148796    | 0.0092469  | 2.93E-58    | 25829.4 | 0.364606   | 1.65626    | 0.0234068  | 0         | 0.23592     |
| 6  | rs41286240  | 134962680 | G | 0.9612 | 0.30989     | 0.023284   | 2.05E-40    | 24551.6 | 0.031033   | 0.65339    | 0.0388879  | 2.36E-63  | -0.07615    |
| 6  | rs9389266   | 135090599 | T | 0.1567 | -0.178707   | 0.0117427  | 2.67E-52    | 27207.7 | 0.15703    | 1.75088    | 0.0252378  | 0         | -0.216386   |
| 6  | rs76200612  | 135093456 | A | 0.2139 | -0.0938567  | 0.0104532  | 2.74E-19    | 27132.3 | 0.201546   | -0.496601  | 0.015133   | 3.52E-236 | -0.0655249  |
| 6  | rs55731938  | 135093712 | A | 0.1201 | -0.209371   | 0.0131231  | 2.65E-57    | 27219.1 | 0.106361   | 0.976011   | 0.0214045  | 0         | 0.260768    |
| 6  | rs7743042   | 135098696 | A | 0.492  | -0.135235   | 0.00853393 | 1.48E-56    | 27217.4 | 0.504636   | -2.6748    | 0.0255088  | 0         | 0.548606    |
| 6  | rs9402686   | 135106679 | A | 0.2353 | 0.431869    | 0.00960635 | 0           | 28090.3 | 0.262632   | 2.54563    | 0.0226587  | 0         | -0.137709   |
| 6  | rs56272853  | 135158413 | G | 0.9388 | -0.0511671  | 0.0189702  | 0.00699188  | 24174.8 | 0.0659726  | 0.356042   | 0.0213545  | 2.06E-62  | -0.116398   |
| 6  | rs145125135 | 135207978 | T | 0.2067 | -0.120727   | 0.010704   | 1.67E-29    | 26485.6 | 0.19946    | -0.242251  | 0.0127798  | 3.96E-80  | -0.265967   |
| 6  | rs2179308   | 135217454 | G | 0.4689 | -0.0356544  | 0.0086045  | 3.42E-05    | 27100.6 | 0.568451   | 0.303966   | 0.0134995  | 2.84E-112 | 0.699583    |
| 6  | rs1013891   | 135217501 | A | 0.6801 | -0.150458   | 0.0091419  | 7.34E-61    | 27227.2 | 0.719183   | -0.819915  | 0.01502    | 0         | 0.1089      |
| 6  | rs72976227  | 135232061 | A | 0.1443 | 0.0386916   | 0.0123761  | 0.0017701   | 26427   | 0.157441   | 0.26185    | 0.0129717  | 1.29E-90  | -0.10933    |
| 6  | rs79336142  | 135235687 | A | 0.0585 | 0.0739274   | 0.0189965  | 9.96E-05    | 25140.7 | 0.0631002  | 0.319581   | 0.0198828  | 3.93E-58  | -0.00534933 |
| 6  | rs184334093 | 135274436 | T | 0.0029 | -0.0282455  | 0.117687   | 0.810326    | 12484.9 | 0.00183877 | 0.776857   | 0.119768   | 8.79E-11  | -0.00759645 |
| 6  | rs79786606  | 135359803 | C | 0.0332 | 0.0626719   | 0.0292837  | 0.0323415   | 18160.8 | 0.0316347  | 0.346797   | 0.0383173  | 1.42E-19  | -0.64348    |
| 6  | rs6917106   | 135634040 | A | 0.9562 | 0.136254    | 0.025611   | 1.04E-07    | 18172.7 | 0.957672   | 0.437676   | 0.0338323  | 2.80E-38  | 0.0301115   |
| 6  | rs72984059  | 135712324 | T | 0.0162 | -0.00687786 | 0.0529054  | 0.896564    | 11208.9 | 0.0221333  | -0.337396  | 0.054055   | 4.33E-10  | 0           |
| 11 | rs151118400 | 5073845   | C | 0.9861 | -0.0916942  | 0.0478786  | 0.0554746   | 15909.5 | 0.0100254  | -0.292104  | 0.04839    | 1.58E-09  | -0.0944116  |
| 11 | rs7479815   | 5193641   | G | 0.4661 | -0.0823704  | 0.00858991 | 8.88E-22    | 27138   | 0.572053   | -0.193174  | 0.00952068 | 1.58E-91  | 0.132421    |
| 11 | rs10837594  | 5210916   | G | 0.0633 | -0.0376094  | 0.018636   | 0.0435803   | 24276.2 | 0.947873   | 1.39319    | 0.0314148  | 0         | 0.0877903   |
| 11 | rs7946748   | 5226496   | A | 0.1309 | -0.124274   | 0.0134202  | 2.04E-20    | 24317   | 0.119616   | -2.36516   | 0.039274   | 0         | -0.837711   |
| 11 | rs10742583  | 5227411   | G | 0.1796 | -0.115772   | 0.0117884  | 9.16E-23    | 24322.4 | 0.84032    | -2.00228   | 0.0360619  | 0         | 0.196806    |
| 11 | rs7948416   | 5235201   | A | 0.7874 | -0.127873   | 0.0104566  | 2.18E-34    | 27166.7 | 0.807576   | -3.96341   | 0.0271813  | 0         | -0.663029   |
| 11 | rs72869882  | 5237463   | T | 0.1066 | -0.0744855  | 0.0151352  | 8.59E-07    | 22894.4 | 0.112597   | -0.694587  | 0.019999   | 2.67E-264 | -0.352732   |
| 11 | rs968856    | 5239346   | T | 0.5151 | 0.141777    | 0.0085309  | 5.05E-62    | 27229.9 | 0.500088   | 3.96507    | 0.0260362  | 0         | -0.654351   |
| 11 | rs2855039   | 5250441   | T | 0.2667 | 0.27539     | 0.00949602 | 6.46E-185   | 27510.4 | 0.310571   | 3.9698     | 0.0282117  | 0         | 0.690869    |
| 11 | rs72886289  | 5302304   | T | 0.2489 | 0.206295    | 0.00981653 | 4.77E-98    | 27312.2 | 0.271073   | 0.141614   | 0.014955   | 2.82E-21  | 0.20538     |
| 11 | rs10837822  | 5324728   | T | 0.4047 | 0.00650301  | 0.00875224 | 0.457475    | 27092.3 | 0.446482   | -0.0877728 | 0.0105047  | 6.51E-17  | 0.445418    |
| 11 | rs10768799  | 5328651   | G | 0.2773 | 0.0364664   | 0.00959252 | 0.000143798 | 27099.3 | 0.802911   | 0.209808   | 0.0122908  | 2.47E-65  | -0.229273   |
| 11 | rs4271412   | 5336853   | C | 0.82   | 0.144162    | 0.0111304  | 2.29E-38    | 27175.8 | 0.15463    | 0.346468   | 0.014704   | 9.27E-123 | 0.540054    |
| 11 | rs73404570  | 5339173   | C | 0.9199 | 0.111659    | 0.0162266  | 5.93E-12    | 25723.8 | 0.0533101  | 0.689955   | 0.0294718  | 3.32E-121 | -0.647578   |
| 11 | rs4910785   | 5411413   | G | 0.1454 | 0.07184     | 0.0125006  | 9.09E-09    | 25716.6 | 0.886249   | 0.735107   | 0.0233708  | 3.69E-217 | 0.291263    |
| 11 | rs1498473   | 5423906   | T | 0.3839 | -0.0655921  | 0.00881987 | 1.03E-13    | 27119.7 | 0.398001   | -0.891342  | 0.0210007  | 0         | -0.858594   |
| 11 | rs10838102  | 5436401   | T | 0.5332 | -0.0510645  | 0.00860254 | 2.92E-09    | 27109.7 | 0.569471   | -0.987255  | 0.0206716  | 0         | 0.189974    |

|    |             |          |   |        |             |            |             |         |            |           |            |           |            |
|----|-------------|----------|---|--------|-------------|------------|-------------|---------|------------|-----------|------------|-----------|------------|
| 11 | rs74993306  | 5447744  | T | 0.0518 | 0.0214967   | 0.0193834  | 0.26742     | 27092.7 | 0.0449536  | 0.815797  | 0.0264175  | 2.15E-209 | -0.0258955 |
| 11 | rs2471987   | 5456114  | T | 0.2885 | -0.0124211  | 0.00948155 | 0.190185    | 27092.9 | 0.284457   | -0.122667 | 0.0102077  | 2.89E-33  | 0          |
| 2  | rs11678492  | 50481661 | C | 0.2721 | 0.0152029   | 0.00965229 | 0.115245    | 27093.3 | 0.322042   | 0.0918863 | 0.00966535 | 1.97E-21  | 0.00189937 |
| 2  | rs7600981   | 53680738 | C | 0.6532 | 0.036644    | 0.00902193 | 4.87E-05    | 27100.3 | 0.355767   | 0.0474483 | 0.00902881 | 1.48E-07  | 0.0071454  |
| 2  | rs763533    | 59812125 | T | 0.3467 | 0.0193878   | 0.00902551 | 0.0317049   | 27094.4 | 0.673467   | 0.119382  | 0.00912738 | 4.31E-39  | -0.061949  |
| 2  | rs7557564   | 60149087 | G | 0.823  | 0.000337675 | 0.0112557  | 0.976067    | 27092   | 0.164469   | -0.220057 | 0.0123806  | 1.12E-70  | 0.339463   |
| 2  | rs7608259   | 60305473 | G | 0.8826 | 0.00164155  | 0.0133458  | 0.902106    | 27092.1 | 0.123543   | -0.167281 | 0.0152158  | 4.09E-28  | -0.0641636 |
| 2  | rs74439825  | 60328723 | C | 0.0317 | 0.0966617   | 0.0257931  | 0.000178552 | 24470.2 | 0.0383765  | 0.558717  | 0.0285122  | 1.68E-85  | -0.192548  |
| 2  | rs7589501   | 60330570 | G | 0.4778 | -0.00565047 | 0.0086003  | 0.511175    | 27092.3 | 0.484872   | -0.229029 | 0.0114833  | 1.67E-88  | 0.598655   |
| 2  | rs9309325   | 60353696 | G | 0.5494 | -0.0269447  | 0.00886252 | 0.0023634   | 25704.7 | 0.44214    | 0.232662  | 0.0124418  | 4.95E-78  | 0.493634   |
| 2  | rs243016    | 60361578 | T | 0.7069 | -0.0779347  | 0.00942003 | 1.30E-16    | 27126.2 | 0.314458   | -2.0991   | 0.0269886  | 0         | 0.639908   |
| 2  | rs181680    | 60362471 | T | 0.4648 | 0.10559     | 0.0085774  | 7.97E-35    | 27167.7 | 0.528855   | 2.01538   | 0.0250765  | 0         | 0.333112   |
| 2  | rs112102583 | 60367602 | G | 0.8888 | -0.0763504  | 0.0140179  | 5.13E-08    | 25714.9 | 0.112584   | -1.75309  | 0.0264272  | 0         | -0.114692  |
| 2  | rs1003691   | 60372462 | A | 0.1411 | -0.0209776  | 0.0123393  | 0.0891194   | 27093.5 | 0.0962227  | -1.75622  | 0.0231995  | 0         | -0.0823928 |
| 2  | rs56168568  | 60388703 | A | 0.0779 | 0.132282    | 0.0164262  | 8.07E-16    | 25732.5 | 0.075222   | -1.63601  | 0.0278113  | 0         | 0.212353   |
| 2  | rs243073    | 60391555 | T | 0.6682 | 0.101524    | 0.00909234 | 5.99E-29    | 27154.3 | 0.642136   | 2.36177   | 0.0269734  | 0         | 0.68221    |
| 2  | rs243065    | 60394929 | C | 0.4459 | -0.183807   | 0.00853387 | 6.78E-103   | 27323.3 | 0.454567   | -2.37548  | 0.0239038  | 0         | -0.133249  |
| 2  | rs56317209  | 60407932 | A | 0.2217 | 0.171006    | 0.0102635  | 2.49E-62    | 27230.6 | 0.210787   | -1.25275  | 0.0201547  | 0         | -0.103867  |
| 2  | rs10180309  | 60425652 | A | 0.0665 | -0.0738989  | 0.0174505  | 2.29E-05    | 26431   | 0.0385744  | -0.864061 | 0.0268249  | 1.23E-227 | -0.0267907 |
| 2  | rs17028162  | 60437941 | G | 0.9713 | 0.280208    | 0.0262519  | 1.35E-26    | 25912   | 0.0126751  | -1.4283   | 0.0403057  | 4.65E-275 | -0.0185926 |
| 2  | rs35125709  | 60473139 | T | 0.0294 | -0.315671   | 0.0263449  | 4.40E-33    | 25101.9 | 0.0312653  | -3.24272  | 0.032163   | 0         | -0.142437  |
| 2  | rs7581162   | 60477349 | A | 0.4559 | -0.018302   | 0.00862447 | 0.0338287   | 27094.3 | 0.433112   | -4.45773  | 0.0229046  | 0         | -0.493258  |
| 2  | rs66808336  | 60477962 | A | 0.2433 | -0.215129   | 0.0102825  | 3.39E-97    | 25248.4 | 0.244835   | -3.08935  | 0.0213587  | 0         | -0.417694  |
| 2  | rs1123573   | 60480453 | G | 0.6166 | -0.0755396  | 0.00881764 | 1.06E-17    | 27128.7 | 0.375863   | -4.62855  | 0.0219749  | 0         | -0.0672689 |
| 2  | rs45527235  | 60481954 | T | 0.0211 | 0.386214    | 0.0304567  | 7.56E-37    | 25935.4 | 0.0106608  | 1.33891   | 0.0455975  | 1.60E-189 | -0.0859679 |
| 2  | rs13019832  | 60483436 | A | 0.4087 | -0.321554   | 0.00840592 | 0           | 27817.2 | 0.405023   | -5.03622  | 0.0244102  | 0         | 0.371461   |
| 2  | rs1427407   | 60490908 | T | 0.8257 | 0.529382    | 0.0106204  | 0           | 28316   | 0.827292   | 5.63997   | 0.0279311  | 0         | 0.618916   |
| 2  | rs1896294   | 60491939 | C | 0.3288 | 0.359042    | 0.0087471  | 0           | 27925.9 | 0.674465   | 4.84235   | 0.0254625  | 0         | -0.311935  |
| 2  | rs766431    | 60492783 | G | 0.9491 | 0.475391    | 0.0197368  | 3.46E-128   | 25989.1 | 0.0442658  | 1.93996   | 0.0293172  | 0         | -0.050427  |
| 2  | rs62142615  | 60494985 | C | 0.9509 | 0.0218416   | 0.0204123  | 0.284609    | 25700.7 | 0.0572921  | -0.467618 | 0.0248985  | 1.08E-78  | -0.169351  |
| 2  | rs6709302   | 60500494 | A | 0.3235 | -0.271529   | 0.00895851 | 8.57E-202   | 27548.8 | 0.322454   | -1.96005  | 0.0183666  | 0         | -0.320943  |
| 2  | rs45622439  | 60514385 | A | 0.3141 | 0.0142537   | 0.00950214 | 0.133602    | 25701.2 | 0.324955   | -0.730041 | 0.0141233  | 0         | -0.0621748 |
| 2  | rs115780642 | 60519267 | C | 0.0109 | 0.419836    | 0.0969744  | 1.50E-05    | 4913.6  | 0.00743276 | 1.51947   | 0.0985309  | 1.18E-53  | -0.0123082 |
| 2  | rs77939806  | 60534663 | C | 0.9737 | -0.0183632  | 0.0282507  | 0.515686    | 24463.4 | 0.0216141  | -1.09182  | 0.0303391  | 1.32E-283 | 0.0742703  |
| 2  | rs3771270   | 60542320 | A | 0.1702 | 0.180804    | 0.0113519  | 4.10E-57    | 27218.7 | 0.154936   | 2.79418   | 0.0317755  | 0         | -0.912673  |
| 2  | rs6739994   | 60543319 | C | 0.2031 | 0.179553    | 0.0105945  | 2.00E-64    | 27235.4 | 0.819736   | 2.77199   | 0.0297603  | 0         | 0.0430188  |
| 2  | rs184624825 | 60561324 | T | 0.0109 | 0.0957709   | 0.0465105  | 0.0394822   | 21434.5 | 0.0151687  | -0.987334 | 0.0493718  | 5.74E-89  | 0.013107   |
| 2  | rs356980    | 60567882 | G | 0.0084 | -0.0779909  | 0.0738514  | 0.290945    | 11005.5 | 0.993995   | -1.79454  | 0.0772428  | 2.14E-119 | 0.0626727  |
| 2  | rs12713423  | 60576285 | G | 0.5862 | -0.0403784  | 0.00871735 | 3.62E-06    | 27102.8 | 0.432636   | -0.411077 | 0.0101352  | 0         | -0.0934258 |
| 2  | rs115035772 | 60594012 | C | 0.9889 | 0.435004    | 0.0533445  | 3.50E-16    | 15940.9 | 0.0118142  | 1.46327   | 0.0562922  | 5.77E-149 | -0.0162073 |
| 2  | rs76397081  | 60599892 | G | 0.9834 | 0.0485808   | 0.0353819  | 0.16974     | 24464.1 | 0.0209878  | 0.835012  | 0.0381717  | 4.48E-106 | -0.0392874 |
| 2  | rs11695541  | 60617175 | C | 0.9396 | 0.127711    | 0.0184893  | 4.94E-12    | 25724   | 0.0602011  | 0.901047  | 0.0247091  | 3.80E-291 | -0.399531  |

|   |             |           |   |        |            |            |            |         |            |           |           |           |             |
|---|-------------|-----------|---|--------|------------|------------|------------|---------|------------|-----------|-----------|-----------|-------------|
| 2 | rs842770    | 60630907  | G | 0.3086 | 0.0781041  | 0.0095302  | 2.50E-16   | 25733.7 | 0.734875   | 0.970706  | 0.0201019 | 0         | 0.0864956   |
| 2 | rs72805325  | 60659888  | G | 0.9787 | 0.00563622 | 0.031312   | 0.857151   | 24463.2 | 0.0212518  | 1.25116   | 0.0420474 | 1.45E-194 | 0.411828    |
| 2 | rs17537498  | 60672327  | C | 0.8877 | -0.0763992 | 0.0139576  | 4.41E-08   | 25715.1 | 0.113173   | -0.194053 | 0.016906  | 1.69E-30  | -0.16036    |
| 2 | rs35980809  | 60674562  | C | 0.7838 | 0.0654098  | 0.0107031  | 9.88E-10   | 25718.8 | 0.177334   | 0.653534  | 0.020207  | 1.79E-229 | -0.04075    |
| 2 | rs72805349  | 60688035  | T | 0.0087 | -0.0932999 | 0.0520041  | 0.0727991  | 21434   | 0.00806862 | -1.08581  | 0.0643316 | 6.50E-64  | -0.0231032  |
| 2 | rs1864268   | 60975034  | G | 0.8986 | 0.0650289  | 0.0142235  | 4.83E-06   | 27102.5 | 0.103042   | 0.212218  | 0.0151975 | 2.58E-44  | 0.367604    |
| 2 | rs77992221  | 61041069  | A | 0.0156 | -0.0662474 | 0.0491789  | 0.177958   | 13460.7 | 0.0170569  | -0.457234 | 0.0511993 | 4.24E-19  | -0.00818088 |
| 2 | rs115720903 | 61539897  | C | 0.9939 | 0.325437   | 0.0799523  | 4.69E-05   | 12885.1 | 0.00757013 | 1.02862   | 0.082439  | 9.92E-36  | -0.00534497 |
| 2 | rs181490772 | 62166472  | C | 0.9968 | -0.325711  | 0.110277   | 0.00314134 | 12881.2 | 0.00201495 | -0.779856 | 0.110743  | 1.89E-12  | 0           |
| 2 | rs7606572   | 99948547  | A | 0.0319 | 0.0439712  | 0.0254306  | 0.0837968  | 25031.7 | 0.0149461  | 0.185661  | 0.0258263 | 6.53E-13  | 0.0602597   |
| 2 | rs11685341  | 100020295 | T | 0.4897 | 0.0450432  | 0.00858721 | 1.56E-07   | 27105.8 | 0.493819   | 0.942588  | 0.0269764 | 1.76E-267 | 0.946981    |
| 2 | rs11123805  | 100027002 | A | 0.503  | -0.0524191 | 0.00858322 | 1.01E-09   | 27110.7 | 0.513683   | -0.951447 | 0.0270808 | 2.07E-270 | 0           |

| Supplementary Table 3. Basis for gene nominations for windows. |     |          |          |               |            |                       |          |       |       |
|----------------------------------------------------------------|-----|----------|----------|---------------|------------|-----------------------|----------|-------|-------|
| Locus                                                          | Chr | Start    | End      | GeneNominatio | Blood eQTL | Erythroid and Erythro | ATAC-RNA | MAGMA | Total |
| chr11p15.4                                                     | 11  | 4823396  | 5823396  | HBB           | 0          | 0                     | 1        | 1     | 2     |
|                                                                |     |          |          | HBG2          | 0          | 0                     |          | 1     | 1     |
|                                                                |     |          |          | HBE1          | 0          | 0                     |          | 1     | 1     |
|                                                                |     |          |          | HBD           | 0          | 0                     | 1        | 1     | 2     |
| chr14q21.1                                                     | 14  | 37516989 | 38516989 | FOXA1         |            |                       |          | 1     | 1     |
|                                                                |     |          |          | TTC6          |            |                       |          | 1     | 1     |
| chr19p13.3                                                     | 19  | 3548207  | 4548207  | ZBTB7A        | 1          | 1                     |          | 1     | 3     |
|                                                                |     |          |          | UBXN6         | 1          | 1                     |          | 0     | 2     |
|                                                                |     |          |          | EEF2          | 1          | 1                     |          | 1     | 3     |
|                                                                |     |          |          | DAPK3         | 1          | 1                     |          | 1     | 3     |
|                                                                |     |          |          | MAP2K2        | 1          | 1                     |          | 1     | 3     |
|                                                                |     |          |          | PIAS4         | 0          | 0                     |          | 1     | 1     |
| chr19p13.2                                                     | 19  | 11298757 | 12298757 | ZNF491        | 1          | 1                     |          |       | 2     |
|                                                                |     |          |          | ACP5          | 1          | 1                     |          |       | 2     |
|                                                                |     |          |          | ELOF1         |            |                       | 1        |       | 1     |
|                                                                |     |          |          | CNN1          |            |                       | 1        |       | 1     |
|                                                                |     |          |          | RAB3D         |            |                       | 1        |       | 1     |
| chr19p13.2-p13                                                 | 19  | 12405805 | 13405805 | KLF1          | 1          | 1                     | 1        |       | 3     |
|                                                                |     |          |          | DNASE2        | 1          | 1                     |          |       | 2     |
|                                                                |     |          |          | RAD23A        | 1          | 1                     |          |       | 2     |
|                                                                |     |          |          | PRDX2         | 1          | 1                     |          |       | 2     |
|                                                                |     |          |          | TNPO2         |            |                       | 1        |       | 1     |
|                                                                |     |          |          | DHPS          |            |                       | 1        |       | 1     |
|                                                                |     |          |          | ZNF443        |            |                       | 1        |       | 1     |
|                                                                |     |          |          | JUNB          |            |                       | 1        |       | 1     |

|                |    |           |           |          |   |   |   |   |
|----------------|----|-----------|-----------|----------|---|---|---|---|
| chr2p16.1-p15  | 2  | 60119313  | 61119313  | BCL11A   | 1 | 1 | 1 | 2 |
| chr2p16.1-p15_ | 2  | 60854299  | 61854299  | USP34    | 1 |   |   | 1 |
|                |    |           |           | REL      | 1 | 1 |   | 2 |
|                |    |           |           | PEX13    | 1 |   |   | 1 |
|                |    |           |           | PUS10    |   |   |   | 0 |
| chr2q11.2      | 2  | 99523649  | 100523649 | AFF3     |   | 1 |   | 1 |
|                |    |           |           | LYG1     |   | 1 |   | 1 |
|                |    |           |           | AHSA2    | 1 | 1 |   | 2 |
| chr5p13.1      | 5  | 38636054  | 39636054  | FYB1     | 1 |   |   | 1 |
|                |    |           |           | RICTOR   | 1 |   |   | 1 |
| chr5q14.3      | 5  | 87301921  | 88301921  | TMEM161B | 1 |   |   | 1 |
|                |    |           |           | COX7C    | 1 |   |   | 1 |
| chr6q15        | 6  | 88658311  | 89658311  | PM20D2   | 1 | 1 |   | 2 |
|                |    |           |           | RRAGD    | 1 | 1 |   | 2 |
|                |    |           |           | PM20D2   | 1 | 1 |   | 2 |
|                |    |           |           | RNGTT    | 1 | 1 |   | 2 |
|                |    |           |           | PNRC1    | 1 | 1 |   | 2 |
| chr6q15_2      | 6  | 89708235  | 90708235  | BACH2    | 1 | 1 | 1 | 3 |
| chr6q23.2-q23. | 6  | 134533050 | 135533050 | HBS1L    | 1 | 1 | 1 | 3 |
|                |    |           |           | MYB      | 1 | 1 |   | 2 |
|                |    |           |           | AHI1     | 1 | 1 |   | 2 |
|                |    |           |           | ALDH8A1  | 1 | 1 | 1 | 3 |
| chr17p13.1     | 17 | 7790253   | 8790253   | CTC1     | 1 | 1 | 0 | 2 |



|  |  |  |         |   |   |   |   |
|--|--|--|---------|---|---|---|---|
|  |  |  | KRBA1   | 1 | 1 | 0 | 2 |
|  |  |  | VAMP2   | 1 | 1 | 1 | 3 |
|  |  |  | AURKB   | 1 | 1 | 0 | 2 |
|  |  |  | TMEM107 |   |   | 1 | 1 |
|  |  |  | HES7    |   |   | 1 | 1 |
|  |  |  | PER1    |   |   | 1 | 1 |
|  |  |  | ALOXE3  |   |   | 1 | 1 |

| Supplementary Table 4. Signal windows across all populations |                  |           |           |           |                |
|--------------------------------------------------------------|------------------|-----------|-----------|-----------|----------------|
|                                                              | mininium p-value |           |           |           |                |
| Window_concat                                                | FEMA             | AFR       | EUR       | THAI      | nominated_gene |
| chr2p16.1-p15                                                | 1.00E-300        | 6.35E-133 | 1.73E-196 | 4.31E-50  | BCL11A         |
| chr2p16.1-p15_2                                              | 2.26E-10         |           |           |           | USP34          |
| chr2p16.2                                                    |                  |           | 2.43E-08  |           | PSME4          |
| chr2q11.2                                                    | 1.01E-09         |           |           |           | AFF3           |
| chr4q28.3                                                    |                  |           | 7.12E-07  | 2.50E-07  | SNHG27         |
| chr5p13.1                                                    | 5.64E-07         |           |           |           | FYB1           |
| chr5q14.3                                                    | 5.29E-07         | 6.83E-08  | 3.34E-07  |           | TMEM161B       |
| chr6q15                                                      | 4.67E-07         |           |           |           | PM20D2         |
| chr6q15_2                                                    | 7.54E-11         | 3.17E-08  | 2.04E-07  |           | BACH2          |
| chr6q23.2-q23.3                                              | 1.00E-300        | 1.04E-149 | 1.30E-189 | 9.54E-138 | HBS1L-MYB      |
| chr6q24.2                                                    |                  |           |           | 7.43E-05  | UTRN           |
| chr8q22.3                                                    |                  | 3.10E-07  |           |           | ZNF706         |
| chr11p15.4                                                   | 6.46E-185        | 1.69E-70  | 5.65E-105 | 6.49E-59  | HBB            |
| chr14q21.1                                                   | 3.08E-07         |           |           |           | FOXA1          |
| chr16p12.4                                                   |                  |           | 4.44E-08  |           | ABCC1          |
| chr17p13.1                                                   | 1.02E-13         | 2.47E-09  | 1.39E-11  | 4.50E-08  | CTC1;KRBA2     |
| chr19p13.2                                                   | 6.17E-15         |           |           |           | ZNF491         |
| chr19p13.2-p13.13                                            | 1.31E-07         |           | 5.99E-08  |           | KLF1           |
| chr19p13.3                                                   | 9.47E-09         |           |           |           | ZBTB7A         |

Supplementary Table 5. Conditionally-independent identified signals from AFR population MAMA meta-analysis

| Chr | SNP         | bp        | refA | freq     | b           | se         | p           | n       | freq_gen0 | bj         | bj_se     | pj       | LD_r        |
|-----|-------------|-----------|------|----------|-------------|------------|-------------|---------|-----------|------------|-----------|----------|-------------|
| 8   | rs723733    | 101115092 | G    | 0.739893 | 0.109474    | 0.0213929  | 3.10E-07    | 3794.51 | 0.205246  | 0.109474   | 0.0214638 | 3.39E-07 | 0           |
| 5   | rs57811114  | 87801921  | T    | 0.970902 | -0.291294   | 0.0539884  | 6.83E-08    | 4057.39 | 0.0462707 | -0.511836  | 0.0642831 | 1.69E-15 | -0.556097   |
| 5   | rs6876161   | 87805793  | C    | 0.877388 | -0.0665647  | 0.0268576  | 0.0131962   | 4330.25 | 0.864058  | -0.203235  | 0.0318876 | 1.85E-10 | 0           |
| 17  | rs141473399 | 8183713   | T    | 0.923812 | 0.0211588   | 0.0227914  | 0.353218    | 9201.94 | 0.0438162 | 0.197113   | 0.0250249 | 3.36E-15 | 0.198576    |
| 17  | rs6503094   | 8254955   | A    | 0.590404 | -0.0739349  | 0.0123983  | 2.47E-09    | 9015.62 | 0.522901  | -0.439656  | 0.0196582 | #####    | 0.579284    |
| 17  | rs4791641   | 8257831   | T    | 0.692581 | 0.0447817   | 0.00923288 | 1.23E-06    | 18513.3 | 0.270231  | 0.100349   | 0.01043   | 6.51E-22 | 0.511317    |
| 17  | rs9902252   | 8264906   | T    | 0.606175 | -0.059365   | 0.0116322  | 3.33E-07    | 10390.1 | 0.568091  | -0.845237  | 0.0260927 | #####    | 0.803933    |
| 17  | rs7207355   | 8271683   | T    | 0.46024  | 0.0604088   | 0.0114116  | 1.20E-07    | 10372.4 | 0.47412   | 1.21526    | 0.0311888 | 0        | 0.795989    |
| 17  | rs8068367   | 8277740   | C    | 0.625278 | -0.05542    | 0.0119787  | 3.72E-06    | 9986.17 | 0.583815  | -1.06554   | 0.0293007 | #####    | -0.81273    |
| 17  | rs62063152  | 8292345   | T    | 0.703021 | -0.0523489  | 0.0135275  | 0.000108926 | 8791.56 | 0.320634  | -0.939163  | 0.0289638 | #####    | 0.647855    |
| 17  | rs7208948   | 8296211   | C    | 0.711906 | -0.0285153  | 0.0129253  | 0.0273732   | 9814.68 | 0.336211  | -0.120608  | 0.0178307 | 1.34E-11 | -0.209503   |
| 17  | rs12600950  | 8329767   | G    | 0.814527 | -0.00084321 | 0.0151211  | 0.95553     | 9740.48 | 0.118822  | 0.12854    | 0.016324  | 3.43E-15 | -0.00510087 |
| 17  | rs17205049  | 8397849   | T    | 0.75522  | 0.0363941   | 0.0138444  | 0.00856873  | 9489    | 0.249726  | 0.105436   | 0.0140417 | 5.97E-14 | 0           |
| 6   | rs9359507   | 81964296  | A    | 0.917148 | 0.146295    | 0.030127   | 1.20E-06    | 4855.32 | 0.0954591 | 0.149128   | 0.03023   | 8.09E-07 | -0.0326805  |
| 6   | rs2325259   | 90140445  | C    | 0.858063 | -0.0963379  | 0.0174153  | 3.17E-08    | 9078.16 | 0.0812166 | -0.128911  | 0.0185261 | 3.44E-12 | -0.44959    |
| 6   | rs2501720   | 90189842  | G    | 0.677921 | -0.0553507  | 0.0173803  | 0.00144917  | 5091.56 | 0.795113  | -0.102576  | 0.0184896 | 2.89E-08 | 0           |
| 6   | rs781732    | 124907947 | T    | 0.633052 | -0.0270066  | 0.0154662  | 0.080782    | 6052.42 | 0.211302  | -0.408819  | 0.0185424 | #####    | 0.395338    |
| 6   | rs505683    | 125819239 | T    | 0.63394  | 0.0237484   | 0.0135767  | 0.0802544   | 7863    | 0.208487  | 0.136421   | 0.0152435 | 3.57E-19 | -0.308126   |
| 6   | rs10457474  | 126111725 | G    | 0.460906 | -0.0397818  | 0.0174447  | 0.0225811   | 4445    | 0.592595  | -0.161845  | 0.0190334 | 1.84E-17 | 0.298232    |
| 6   | rs9388985   | 132349858 | C    | 0.663705 | -0.029266   | 0.0174935  | 0.0943343   | 4923.59 | 0.817678  | -0.292207  | 0.0205791 | 9.26E-46 | 0.306111    |
| 6   | rs962189    | 134889044 | A    | 0.526211 | -0.101667   | 0.0188798  | 7.25E-08    | 3757.7  | 0.686605  | -0.334918  | 0.0214313 | 4.73E-55 | -0.360776   |
| 6   | rs2015898   | 134891089 | T    | 0.8996   | -0.15437    | 0.0222719  | 4.17E-12    | 7462.09 | 0.0541008 | -0.679864  | 0.0325699 | 9.22E-97 | -0.737685   |
| 6   | rs6899500   | 134905951 | T    | 0.868947 | -0.202209   | 0.0190667  | 2.81E-26    | 8014.89 | 0.926895  | -1.80418   | 0.0355224 | 0        | -0.813606   |
| 6   | rs1547247   | 135069698 | A    | 0.889605 | -0.271973   | 0.0170664  | 3.56E-57    | 11508.3 | 0.0668272 | -1.37424   | 0.0266115 | 0        | 0.103496    |
| 6   | rs13220662  | 135074410 | G    | 0.524434 | 0.122966    | 0.0139433  | 1.16E-18    | 6861.53 | 0.615201  | 0.482128   | 0.0159876 | #####    | 0.107949    |
| 6   | rs9376090   | 135090090 | C    | 0.915371 | -0.731743   | 0.0280794  | 1.04E-149   | 4829.91 | 0.0442741 | -1.45155   | 0.0431341 | #####    | -0.200019   |
| 6   | rs2210366   | 135094070 | A    | 0.562861 | 0.168876    | 0.0112523  | 6.50E-51    | 10574.8 | 0.464462  | 0.284267   | 0.0134195 | 1.36E-99 | 0.486698    |
| 6   | rs6930223   | 135103065 | G    | 0.685251 | 0.0727406   | 0.0107363  | 1.24E-11    | 13487.3 | 0.733271  | 1.11108    | 0.0194783 | 0        | 0.303941    |
| 6   | rs9376092   | 135106006 | A    | 0.795869 | -0.093267   | 0.0291146  | 0.00135792  | 2433.69 | 0.20116   | 0.525444   | 0.0320999 | 3.18E-60 | 0.462815    |
| 6   | rs9494145   | 135111414 | C    | 0.894713 | -0.459772   | 0.0223862  | 9.81E-94    | 6705.61 | 0.0743474 | -1.00279   | 0.0321306 | #####    | -0.37607    |
| 6   | rs1320959   | 135116248 | T    | 0.559751 | -0.166328   | 0.01072    | 2.72E-54    | 11640   | 0.637584  | -1.42838   | 0.0216814 | 0        | 0.500551    |
| 6   | rs6914717   | 135135620 | G    | 0.654376 | 0.168361    | 0.0112125  | 5.82E-51    | 11607.3 | 0.36277   | 0.366149   | 0.0136792 | #####    | 0.045355    |
| 6   | rs56316290  | 135164360 | A    | 0.845846 | -0.23141    | 0.0158908  | 4.86E-48    | 10006.6 | 0.148813  | -0.454584  | 0.0178614 | #####    | -0.206503   |
| 6   | rs7744765   | 135202445 | T    | 0.559751 | -0.147534   | 0.0120004  | 9.74E-35    | 9329.74 | 0.611294  | -0.284777  | 0.0129441 | #####    | 0.152031    |
| 6   | rs73548042  | 135555913 | G    | 0.642381 | 0.00252322  | 0.014101   | 0.857986    | 7365.98 | 0.470179  | 0.193984   | 0.0153893 | 1.98E-36 | 0.0202335   |
| 6   | rs1338704   | 144930983 | A    | 0.806308 | -0.0148448  | 0.012689   | 0.242042    | 13378.5 | 0.202662  | -0.0758737 | 0.0128368 | 3.41E-09 | -0.100516   |
| 6   | rs522959    | 145056776 | G    | 0.817414 | 0.0456491   | 0.0171286  | 0.00769697  | 7676.98 | 0.089647  | 0.906114   | 0.0277778 | #####    | 0.079027    |
| 6   | rs644113    | 145064235 | T    | 0.844291 | -0.0681966  | 0.0216734  | 0.00165204  | 5438.99 | 0.923895  | -0.570672  | 0.024662  | #####    | -0.0311795  |

|    |            |           |   |          |             |            |            |         |           |           |            |          |            |
|----|------------|-----------|---|----------|-------------|------------|------------|---------|-----------|-----------|------------|----------|------------|
| 6  | rs2328639  | 145187433 | G | 0.742781 | 0.0450463   | 0.0137213  | 0.00102728 | 9342.85 | 0.833122  | 0.396709  | 0.0179927  | #####    | -0.311658  |
| 6  | rs1078175  | 146525009 | C | 0.724567 | -0.00327234 | 0.014965   | 0.826909   | 7528.29 | 0.148257  | -0.353602 | 0.018834   | 1.22E-78 | 0          |
| 11 | rs4758492  | 2940947   | A | 0.936028 | 0.0439571   | 0.0181913  | 0.0156759  | 16973   | 0.0635619 | 0.170143  | 0.0207483  | 2.40E-16 | -0.455846  |
| 11 | rs7118896  | 3016306   | T | 0.906042 | 0.0644143   | 0.013316   | 1.32E-06   | 22264.9 | 0.865344  | 0.455407  | 0.0286306  | 5.73E-57 | 0.36857    |
| 11 | rs7103117  | 3016502   | C | 0.959351 | 0.0378082   | 0.0172247  | 0.0281639  | 29073.9 | 0.953584  | -0.135691 | 0.021438   | 2.46E-10 | 0.0555521  |
| 11 | rs366422   | 3032643   | T | 0.936473 | 0.0653253   | 0.0166407  | 8.65E-05   | 20407.2 | 0.0981826 | 0.525049  | 0.0326783  | 4.33E-58 | 0.0255076  |
| 11 | rs4910694  | 4966235   | T | 0.558418 | -0.0914718  | 0.0206715  | 9.64E-06   | 3174.21 | 0.47609   | -0.207317 | 0.0229551  | 1.70E-19 | 0.464604   |
| 11 | rs10734468 | 4984988   | A | 0.505553 | 0.0757771   | 0.0239263  | 0.00153967 | 2341.95 | 0.797741  | 0.206964  | 0.0266412  | 7.94E-15 | -0.00589   |
| 11 | rs12788454 | 5196555   | C | 0.995558 | 0.453908    | 0.100416   | 6.18E-06   | 7524.39 | 0.212121  | 1.22215   | 0.105659   | 6.06E-31 | -0.256023  |
| 11 | rs7937649  | 5201149   | G | 0.581075 | 0.0492648   | 0.0178803  | 0.00586465 | 4316.25 | 0.52829   | 0.348373  | 0.0198938  | 1.17E-68 | 0.205244   |
| 11 | rs10837621 | 5222383   | T | 0.977343 | -0.158396   | 0.039044   | 4.97E-05   | 9950.92 | 0.202671  | -0.216052 | 0.0398603  | 5.95E-08 | 0.0533678  |
| 11 | rs7936823  | 5228938   | G | 0.632608 | -0.194272   | 0.023872   | 4.02E-16   | 2474.85 | 0.682899  | -0.991338 | 0.0424975  | #####    | 0.327109   |
| 11 | rs3813727  | 5234682   | G | 0.477788 | 0.163505    | 0.0126484  | 3.17E-38   | 8262.14 | 0.2448    | 0.247035  | 0.0161047  | 4.18E-53 | 0.254601   |
| 11 | rs7948416  | 5235201   | A | 0.66215  | 0.00727835  | 0.0272107  | 0.789099   | 2032.01 | 0.831086  | 0.982808  | 0.0419519  | #####    | 0.421838   |
| 11 | rs7948668  | 5235417   | G | 0.462683 | 0.18609     | 0.0178731  | 2.19E-25   | 4128.76 | 0.463466  | 0.625388  | 0.0277823  | #####    | -0.351527  |
| 11 | rs3759074  | 5236548   | A | 0.966459 | -0.724192   | 0.0474629  | 1.46E-52   | 4375.25 | 0.130802  | -1.66224  | 0.08543    | 2.52E-84 | -0.517136  |
| 11 | rs3759073  | 5237035   | T | 0.625944 | -0.19975    | 0.0203782  | 1.10E-22   | 3364.99 | 0.649435  | -0.745225 | 0.0383724  | 5.14E-84 | 0.783202   |
| 11 | rs4910736  | 5237759   | C | 0.544869 | -0.191818   | 0.016325   | 7.07E-32   | 4953.36 | 0.532713  | -0.768958 | 0.0259178  | #####    | -0.324962  |
| 11 | rs12284340 | 5259051   | T | 0.994891 | -1.32063    | 0.115686   | 3.49E-30   | 4816.42 | 0.0887196 | 1.79305   | 0.184837   | 2.99E-22 | 0.828046   |
| 11 | rs10160820 | 5261227   | C | 0.990893 | -1.15789    | 0.0652289  | 1.69E-70   | 8447.88 | 0.124502  | -2.30107  | 0.0989202  | #####    | -0.444463  |
| 11 | rs7480910  | 5261976   | A | 0.377166 | -0.0977549  | 0.0125493  | 6.72E-15   | 9034.07 | 0.585505  | -1.03069  | 0.0214776  | 0        | 0.412759   |
| 11 | rs10768733 | 5265926   | C | 0.979343 | 0.486061    | 0.0413077  | 5.79E-32   | 9608.26 | 0.89101   | 2.49657   | 0.0603269  | 0        | 0.213572   |
| 11 | rs72872548 | 5267909   | A | 0.471124 | -0.234108   | 0.0155376  | 2.66E-51   | 5366.83 | 0.273658  | -1.14735  | 0.0265719  | 0        | 0.419452   |
| 11 | rs7479652  | 5271883   | T | 0.571968 | 0.111293    | 0.0233025  | 1.79E-06   | 2508.86 | 0.58156   | 0.340766  | 0.0358311  | 1.90E-21 | 0.474077   |
| 11 | rs4910548  | 5273171   | C | 0.964904 | 0.442563    | 0.0423506  | 1.47E-25   | 5430.82 | 0.745435  | 1.06344   | 0.0559687  | 1.69E-80 | 0.473507   |
| 11 | rs6578596  | 5274401   | G | 0.92781  | -0.323322   | 0.0431469  | 6.71E-14   | 2642.9  | 0.408149  | -1.29914  | 0.068574   | 4.85E-80 | 0.152093   |
| 11 | rs11036635 | 5287666   | A | 0.57952  | -0.28847    | 0.0221926  | 1.25E-38   | 2635.26 | 0.286359  | -0.69717  | 0.0335757  | 9.13E-96 | 0.645997   |
| 11 | rs7119142  | 5287848   | G | 0.545313 | -0.228156   | 0.0203478  | 3.53E-29   | 3152.41 | 0.483579  | -0.472809 | 0.0291119  | 2.58E-59 | 0.479398   |
| 11 | rs10768774 | 5289803   | G | 0.471346 | 0.231482    | 0.0210953  | 5.15E-28   | 2914.51 | 0.602947  | 0.901767  | 0.0295825  | #####    | 0.425836   |
| 11 | rs9633908  | 5299031   | C | 0.914038 | 0.172761    | 0.0277886  | 5.07E-10   | 5507.14 | 0.219947  | -0.74282  | 0.0348057  | #####    | -0.043525  |
| 11 | rs10837776 | 5303257   | C | 0.889382 | -0.214154   | 0.0179595  | 8.84E-33   | 10460.8 | 0.286925  | -0.418117 | 0.020611   | 1.71E-91 | 0.254155   |
| 11 | rs10742615 | 5303747   | G | 0.970458 | 0.457385    | 0.0456371  | 1.22E-23   | 5534.72 | 0.865744  | 1.04899   | 0.052312   | 1.91E-89 | -0.123186  |
| 11 | rs4910744  | 5312724   | G | 0.12861  | 0.103498    | 0.0180356  | 9.55E-09   | 9196.75 | 0.565883  | 0.200782  | 0.0191941  | 1.31E-25 | -0.176541  |
| 11 | rs77311317 | 5321683   | G | 0.992892 | -0.350054   | 0.0357406  | 1.19E-22   | 37223   | 0.0236479 | -0.391817 | 0.036095   | 1.88E-27 | 0.033946   |
| 11 | rs78428451 | 5332425   | C | 0.904043 | -0.237945   | 0.0229553  | 3.56E-25   | 7253.15 | 0.18664   | -0.485336 | 0.0266628  | 4.91E-74 | 0.389328   |
| 11 | rs2723377  | 5332482   | A | 0.487339 | 0.138026    | 0.0168126  | 2.22E-16   | 4697.43 | 0.61062   | 0.433716  | 0.0205618  | 9.17E-99 | 0.317687   |
| 11 | rs78930059 | 5333450   | T | 0.95291  | -0.301216   | 0.0304283  | 4.20E-23   | 8000.48 | 0.161309  | -0.562671 | 0.0341673  | 6.22E-61 | -0.295853  |
| 11 | rs4910769  | 5362483   | C | 0.670591 | -0.0481218  | 0.0176871  | 0.00651381 | 4861.95 | 0.332618  | -0.276466 | 0.0206832  | 9.47E-41 | -0.198901  |
| 11 | rs7113385  | 5366200   | A | 0.969347 | -0.17654    | 0.0241863  | 2.90E-13   | 19302.9 | 0.0776187 | -0.324873 | 0.0262416  | 3.35E-35 | 0.0552932  |
| 11 | rs7482183  | 5373020   | G | 0.587739 | 0.0352836   | 0.00669963 | 1.39E-07   | 30906.8 | 0.96764   | 0.0632664 | 0.00680108 | 1.37E-20 | -0.0813732 |
| 11 | rs1498473  | 5423906   | T | 0.903598 | 0.0746832   | 0.0168797  | 9.67E-06   | 13536.4 | 0.293803  | 0.151518  | 0.0186875  | 5.15E-16 | -0.0374129 |
| 11 | rs2647593  | 5466366   | G | 0.251888 | 0.0967472   | 0.0177146  | 4.72E-08   | 5660.34 | 0.660201  | 0.170472  | 0.0192571  | 8.56E-19 | 0.231838   |

|    |            |          |   |          |             |           |            |         |           |           |           |          |            |
|----|------------|----------|---|----------|-------------|-----------|------------|---------|-----------|-----------|-----------|----------|------------|
| 11 | rs2467218  | 5469630  | A | 0.910262 | -0.152365   | 0.0253793 | 1.93E-09   | 6359.14 | 0.266334  | -0.491482 | 0.0304881 | 1.83E-58 | -0.199436  |
| 11 | rs16931459 | 5472079  | T | 0.959574 | -0.085856   | 0.0341688 | 0.0119809  | 7422.92 | 0.102908  | -0.424247 | 0.0380254 | 6.62E-29 | 0.23376    |
| 11 | rs369934   | 5472279  | T | 0.223456 | 0.0781851   | 0.0158884 | 8.62E-07   | 7656.93 | 0.675162  | 0.313051  | 0.0190676 | 1.42E-60 | -0.0495363 |
| 11 | rs2880345  | 5672317  | G | 0.918481 | -0.104708   | 0.0228888 | 4.77E-06   | 8556.59 | 0.815365  | -0.118857 | 0.023366  | 3.64E-07 | 0.200534   |
| 11 | rs7124435  | 5680589  | G | 0.91315  | 0.103125    | 0.0257481 | 6.20E-05   | 6383.57 | 0.844945  | 0.165839  | 0.0263546 | 3.12E-10 | 0          |
| 2  | rs12477781 | 60030542 | G | 0.882052 | -0.0865727  | 0.0213153 | 4.88E-05   | 7101.91 | 0.084231  | -0.11572  | 0.021411  | 6.49E-08 | -0.017953  |
| 2  | rs34708166 | 60152076 | C | 0.883829 | -0.0412073  | 0.025703  | 0.108888   | 4958.13 | 0.118836  | -0.169939 | 0.025878  | 5.14E-11 | -0.0163183 |
| 2  | rs13406582 | 60323802 | C | 0.758996 | -0.0288875  | 0.0236645 | 0.222197   | 3283.7  | 0.317599  | -0.135233 | 0.0248076 | 5.00E-08 | 0.187419   |
| 2  | rs243017   | 60361337 | G | 0.717459 | -0.106442   | 0.0193713 | 3.91E-08   | 4393.56 | 0.730304  | -0.160437 | 0.0225693 | 1.17E-12 | 0.37173    |
| 2  | rs2419919  | 60401988 | G | 0.543314 | 0.159461    | 0.0129864 | 1.17E-34   | 7889.95 | 0.474403  | 0.523397  | 0.0299613 | 2.46E-68 | 0.879276   |
| 2  | rs12105503 | 60423607 | G | 0.561972 | 0.155775    | 0.0127142 | 1.64E-34   | 8305.48 | 0.441301  | 0.624104  | 0.0265925 | #####    | 0.392538   |
| 2  | rs12990774 | 60442427 | C | 0.706575 | 0.123223    | 0.0133787 | 3.25E-20   | 8981.89 | 0.334581  | 0.795017  | 0.0204131 | 0        | 0.65032    |
| 2  | rs12468946 | 60443342 | A | 0.510662 | -0.191904   | 0.0132372 | 1.26E-47   | 7474.24 | 0.541471  | -1.79068  | 0.029925  | 0        | 0.468719   |
| 2  | rs45611631 | 60450259 | G | 0.785873 | 0.133691    | 0.0182886 | 2.67E-13   | 5924.84 | 0.211651  | 0.696563  | 0.0257121 | #####    | 0.408484   |
| 2  | rs45600937 | 60451366 | A | 0.912039 | 0.192246    | 0.0363056 | 1.19E-07   | 3154.5  | 0.0849317 | 0.909316  | 0.0415553 | #####    | -0.0447339 |
| 2  | rs6545816  | 60487726 | C | 0.568858 | 0.0680313   | 0.0227313 | 0.00276393 | 2646.73 | 0.385799  | 2.06333   | 0.043644  | 0        | 0.430987   |
| 2  | rs1427407  | 60490908 | T | 0.775433 | -0.572665   | 0.0233413 | 6.35E-133  | 2945.13 | 0.765446  | -3.81224  | 0.0555773 | 0        | 0.378096   |
| 2  | rs7599488  | 60491212 | T | 0.655931 | -0.00373933 | 0.0213689 | 0.861088   | 3265.49 | 0.323576  | 2.16838   | 0.0475974 | 0        | 0.230543   |
| 2  | rs7557939  | 60494212 | G | 0.669924 | -0.352957   | 0.0187259 | 3.02E-79   | 3984.46 | 0.695954  | -1.30549  | 0.0332715 | 0        | 0.530463   |
| 2  | rs6706648  | 60494905 | T | 0.651044 | 0.342767    | 0.0210051 | 7.31E-60   | 3090.99 | 0.389653  | 4.16541   | 0.0535417 | 0        | -0.302688  |
| 2  | rs7560588  | 60500281 | A | 0.841404 | 0.0300287   | 0.0284966 | 0.291989   | 3104.49 | 0.133288  | 0.512929  | 0.034597  | 9.98E-50 | -0.272829  |
| 2  | rs6709302  | 60500494 | A | 0.685695 | 0.325244    | 0.02247   | 1.75E-47   | 2883.21 | 0.322408  | 0.841018  | 0.0349526 | #####    | 0.0985109  |
| 2  | rs6740203  | 60513356 | T | 0.568192 | 0.0452046   | 0.0167571 | 0.00698322 | 4876.93 | 0.442717  | 0.532546  | 0.0255696 | 2.45E-96 | 0.847083   |
| 2  | rs168565   | 60517196 | A | 0.563972 | -0.133911   | 0.020769  | 1.14E-10   | 3131.07 | 0.514167  | -0.614896 | 0.0337878 | 5.28E-74 | 0.2263     |
| 2  | rs7600607  | 60667890 | T | 0.760551 | 0.0218855   | 0.0205601 | 0.287119   | 4370.02 | 0.254883  | 0.176262  | 0.0221977 | 2.01E-15 | 0          |

Supplementary Table 6. Conditionally-independent identified signals from EUR population MAMA meta-analysis

| Chr | SNP         | bp        | refA | freq     | b           | se         | p           | n       | freq_gen  | bj         | bj_se      | pj       | LD_r        |
|-----|-------------|-----------|------|----------|-------------|------------|-------------|---------|-----------|------------|------------|----------|-------------|
| 19  | rs11085825  | 12896644  | T    | 0.627124 | 0.0566798   | 0.0104591  | 5.99E-08    | 20681.2 | 0.359851  | 0.707768   | 0.026994   | #####    | 0.593963    |
| 19  | rs12611068  | 12903500  | T    | 0.607322 | -0.00213562 | 0.0128359  | 0.867859    | 13483.5 | 0.591206  | 0.217335   | 0.0192367  | 1.34E-29 | -0.682607   |
| 19  | rs10419627  | 12925863  | G    | 0.585755 | 0.0379136   | 0.0101984  | 0.000201129 | 20978.5 | 0.598265  | 0.416977   | 0.0230002  | 1.87E-73 | 0.864079    |
| 19  | rs10412055  | 12964351  | T    | 0.636932 | 0.0569158   | 0.0113322  | 5.10E-07    | 17814.7 | 0.655692  | 0.494359   | 0.0244095  | 3.36E-91 | 0.276202    |
| 19  | rs111920893 | 12964515  | C    | 0.86333  | -0.0741178  | 0.0184031  | 5.64E-05    | 13241.8 | 0.136242  | -0.271144  | 0.0234464  | 6.24E-31 | 0           |
| 4   | rs349818    | 131958021 | A    | 0.733999 | -0.061344   | 0.0123724  | 7.12E-07    | 17701.7 | 0.72013   | -0.061344  | 0.0123806  | 7.24E-07 | 0           |
| 5   | rs62367635  | 87815363  | G    | 0.983679 | -0.230877   | 0.045241   | 3.34E-07    | 16096.8 | 0.0163231 | -1.12001   | 0.0715605  | 3.26E-55 | -0.0149827  |
| 5   | rs1534607   | 87935550  | C    | 0.961557 | -0.0425855  | 0.0283214  | 0.132671    | 17865.9 | 0.0304014 | -0.814139  | 0.0557439  | 2.61E-48 | -0.755636   |
| 5   | rs6452766   | 88046879  | T    | 0.942982 | -0.0765501  | 0.0243716  | 0.00168398  | 16579.2 | 0.949056  | -0.900553  | 0.0561885  | 8.23E-58 | 0           |
| 17  | rs3027218   | 8115807   | T    | 0.75519  | -0.0408994  | 0.0149435  | 0.00620151  | 12825.3 | 0.239291  | -0.181194  | 0.0165399  | 6.29E-28 | 0.217184    |
| 17  | rs4247363   | 8197054   | T    | 0.948587 | 0.0274768   | 0.0221461  | 0.214715    | 22147.4 | 0.0569957 | 0.497955   | 0.0264641  | 5.56E-79 | -0.258672   |
| 17  | rs7503353   | 8204661   | G    | 0.530673 | -0.0445217  | 0.0108869  | 4.32E-05    | 17930.4 | 0.521741  | -0.425941  | 0.0205841  | 4.03E-95 | 0.878774    |
| 17  | rs8078338   | 8225842   | G    | 0.497642 | 0.0694791   | 0.0102797  | 1.39E-11    | 20008.8 | 0.496792  | 1.09595    | 0.0280872  | 0        | -0.220915   |
| 17  | rs62063135  | 8244427   | A    | 0.943523 | -0.070587   | 0.0282045  | 0.0123255   | 12492.1 | 0.0494895 | -0.287078  | 0.0318715  | 2.11E-19 | -0.449176   |
| 17  | rs9891699   | 8253992   | C    | 0.801518 | -0.111173   | 0.0132578  | 5.05E-17    | 18876   | 0.796538  | -0.568337  | 0.0196856  | #####    | 0.428471    |
| 17  | rs1132554   | 8270449   | C    | 0.524593 | -0.0687995  | 0.0103278  | 2.71E-11    | 19871.4 | 0.527697  | -0.681233  | 0.0220235  | #####    | -0.513552   |
| 17  | rs7219784   | 8304275   | C    | 0.796097 | -0.0586372  | 0.0116001  | 4.31E-07    | 24228.4 | 0.208147  | -0.303961  | 0.015676   | 9.34E-84 | 0           |
| 6   | rs2325259   | 90140445  | C    | 0.640322 | -0.0686982  | 0.013222   | 2.04E-07    | 13131.5 | 0.3498    | -0.0686982 | 0.0132351  | 2.10E-07 | 0           |
| 6   | rs66853605  | 134411354 | A    | 0.8748   | 0.0454535   | 0.0151259  | 0.0026557   | 21132.9 | 0.134861  | 0.101601   | 0.0152364  | 2.59E-11 | -0.00659114 |
| 6   | rs9402632   | 134730675 | G    | 0.656975 | 0.0299308   | 0.010538   | 0.00450728  | 21161.5 | 0.652854  | 0.191867   | 0.0160762  | 7.79E-33 | -0.771546   |
| 6   | rs11759868  | 134747985 | T    | 0.688863 | 0.0376181   | 0.0111394  | 0.000732712 | 19908.8 | 0.3198    | 0.159669   | 0.01708    | 8.91E-21 | -0.104142   |
| 6   | rs9402657   | 134849369 | T    | 0.648619 | -0.0111546  | 0.00672779 | 0.0973213   | 51351.2 | 0.33675   | -0.106258  | 0.00791628 | 4.45E-41 | 0.379315    |
| 6   | rs1883225   | 134851207 | G    | 0.763368 | 0.0743619   | 0.011781   | 2.75E-10    | 21091.5 | 0.767379  | 0.307104   | 0.0143805  | #####    | 0.301543    |
| 6   | rs9399125   | 134876770 | T    | 0.749532 | -0.0835599  | 0.0114064  | 2.38E-13    | 21636.2 | 0.239177  | -0.566978  | 0.0176882  | #####    | -0.756942   |
| 6   | rs6899500   | 134905951 | T    | 0.67258  | -0.124399   | 0.0113341  | 5.01E-28    | 18607   | 0.680943  | -0.95806   | 0.0220471  | 0        | 0.747175    |
| 6   | rs2281038   | 134910375 | G    | 0.539279 | -0.0133456  | 0.0079926  | 0.0949691   | 33375.5 | 0.545429  | 0.147307   | 0.0137584  | 9.46E-27 | 0.738927    |
| 6   | rs2072827   | 134932465 | A    | 0.536766 | 0.0144502   | 0.00794202 | 0.0688418   | 33775.5 | 0.454899  | 0.110613   | 0.0127836  | 5.03E-18 | 0.661036    |
| 6   | rs1022491   | 134938228 | C    | 0.630001 | -0.0680037  | 0.0100111  | 1.10E-11    | 22631.3 | 0.640127  | -0.809615  | 0.0244076  | #####    | -0.88529    |
| 6   | rs4646870   | 134950190 | A    | 0.666933 | -0.0491836  | 0.009919   | 7.10E-07    | 24216.2 | 0.330826  | -0.472298  | 0.0204925  | #####    | 0.756658    |
| 6   | rs1547247   | 135069698 | A    | 0.695518 | -0.203241   | 0.0121538  | 9.01E-63    | 16656.3 | 0.300696  | -0.525129  | 0.0230638  | #####    | 0.632362    |
| 6   | rs13220662  | 135074410 | A    | 0.656499 | -0.130069   | 0.0110839  | 8.44E-32    | 18985.2 | 0.32781   | -0.288296  | 0.0209699  | 5.23E-43 | 0.396212    |
| 6   | rs55731938  | 135093712 | A    | 0.886541 | 0.178183    | 0.0159012  | 3.83E-29    | 20705   | 0.106361  | 0.346603   | 0.0236024  | 8.03E-49 | -0.19323    |
| 6   | rs7776054   | 135097778 | G    | 0.738786 | -0.393516   | 0.0133982  | 1.30E-189   | 14430.5 | 0.255061  | -0.364091  | 0.0233895  | 1.23E-54 | 0.58211     |
| 6   | rs7743042   | 135098696 | A    | 0.50802  | 0.0588475   | 0.00925293 | 2.02E-10    | 24717.2 | 0.504636  | 0.765746   | 0.0206354  | #####    | 0.911176    |
| 6   | rs6930223   | 135103065 | T    | 0.496735 | -0.0712028  | 0.00970142 | 2.15E-13    | 22462.9 | 0.493241  | -0.645067  | 0.0224986  | #####    | 0.134812    |
| 6   | rs7744765   | 135202445 | C    | 0.58907  | 0.110934    | 0.00855409 | 1.85E-38    | 29741.4 | 0.392854  | 0.344014   | 0.0136343  | #####    | 0.696678    |
| 6   | rs210944    | 135213880 | G    | 0.523153 | -0.0453436  | 0.00880796 | 2.63E-07    | 27347.4 | 0.503287  | -0.274415  | 0.0149174  | 1.42E-75 | -0.702395   |
| 6   | rs2179308   | 135217454 | G    | 0.560662 | 0.0297917   | 0.00831328 | 0.000338856 | 31107.7 | 0.568451  | -0.209212  | 0.0140112  | 2.05E-50 | 0.699583    |
| 6   | rs1013891   | 135217501 | A    | 0.715997 | 0.0814411   | 0.0085915  | 2.56E-21    | 35205.6 | 0.719183  | 0.374003   | 0.0131515  | #####    | 0.0972943   |

|    |             |           |   |          |             |            |             |         |           |            |           |          |             |
|----|-------------|-----------|---|----------|-------------|------------|-------------|---------|-----------|------------|-----------|----------|-------------|
| 6  | rs12196516  | 135229205 | T | 0.836378 | -0.0255457  | 0.0138256  | 0.064643    | 20249.7 | 0.168743  | -0.093413  | 0.0144832 | 1.12E-10 | -0.136336   |
| 6  | rs2050017   | 135263011 | C | 0.875159 | 0.034197    | 0.014649   | 0.0195734   | 22590.9 | 0.115941  | 0.124227   | 0.0155633 | 1.44E-15 | 0.278457    |
| 6  | rs2327612   | 135295481 | C | 0.963307 | -0.136388   | 0.0357996  | 0.000139095 | 11680.8 | 0.0405916 | -0.188443  | 0.0369288 | 3.35E-07 | -0.0858537  |
| 6  | rs9321502   | 135335114 | C | 0.606957 | -0.0246759  | 0.010678   | 0.0208381   | 19471.6 | 0.60652   | -0.0880328 | 0.0116346 | 3.83E-14 | -0.374518   |
| 6  | rs6570028   | 135754784 | C | 0.666755 | 0.00125843  | 0.00949717 | 0.894584    | 26434.9 | 0.335537  | -0.0683452 | 0.0101532 | 1.68E-11 | 0           |
| 11 | rs7122597   | 4708420   | A | 0.825993 | -0.0172557  | 0.0166156  | 0.299025    | 13350.6 | 0.178326  | -0.084302  | 0.0167476 | 4.81E-07 | -0.0511864  |
| 11 | rs2595972   | 4930136   | A | 0.550311 | -0.0521849  | 0.0105741  | 8.01E-07    | 19122.4 | 0.547962  | -0.140975  | 0.0138193 | 1.96E-24 | -0.648016   |
| 11 | rs10837027  | 4955796   | A | 0.621597 | -0.0285339  | 0.0111204  | 0.0102905   | 18207.2 | 0.371049  | -0.117384  | 0.0144785 | 5.17E-16 | -0.035552   |
| 11 | rs7479815   | 5193641   | G | 0.558315 | 0.113103    | 0.0138866  | 3.80E-16    | 11075   | 0.572053  | 0.2897     | 0.0178386 | 2.63E-59 | -0.48645    |
| 11 | rs72883123  | 5193799   | A | 0.742426 | 0.0370954   | 0.0149617  | 0.0131618   | 12370.4 | 0.247496  | 0.25941    | 0.0183468 | 2.18E-45 | -0.0401681  |
| 11 | rs6421047   | 5203430   | G | 0.830727 | 0.109895    | 0.0168556  | 7.04E-11    | 13218.5 | 0.82475   | 0.365153   | 0.0260655 | 1.37E-44 | -0.812048   |
| 11 | rs35207925  | 5206240   | T | 0.88807  | 0.107365    | 0.0181775  | 3.49E-09    | 16095.4 | 0.122726  | 0.590549   | 0.0289436 | 1.56E-92 | -0.066351   |
| 11 | rs7936823   | 5228938   | A | 0.556214 | 0.127854    | 0.0103187  | 2.94E-35    | 20003.8 | 0.460594  | 0.89043    | 0.0217026 | 0        | 0.882013    |
| 11 | rs4910736   | 5237759   | C | 0.477295 | -0.126673   | 0.0101562  | 1.05E-35    | 20431.6 | 0.501506  | -1.92861   | 0.026099  | 0        | -0.662925   |
| 11 | rs10128556  | 5242453   | T | 0.667138 | -0.274012   | 0.0125929  | 5.65E-105   | 14571   | 0.312298  | -1.31484   | 0.0232888 | 0        | 0.338726    |
| 11 | rs6578592   | 5247910   | C | 0.784822 | 0.191453    | 0.0142565  | 4.08E-41    | 15254.8 | 0.79183   | 1.03121    | 0.0269913 | 0        | 0.845587    |
| 11 | rs10768774  | 5289803   | G | 0.756366 | 0.196275    | 0.014855   | 7.41E-40    | 12854   | 0.763379  | 0.401439   | 0.0254871 | 6.80E-56 | 0.365632    |
| 11 | rs35423254  | 5294668   | T | 0.69044  | 0.056712    | 0.0132041  | 1.75E-05    | 14199   | 0.319582  | -0.471289  | 0.019426  | #####    | 0.791505    |
| 11 | rs3888708   | 5297150   | A | 0.591903 | 0.086349    | 0.0101023  | 1.26E-17    | 21417.2 | 0.424374  | 0.25007    | 0.0194621 | 8.70E-38 | -0.546936   |
| 11 | rs10837776  | 5303257   | C | 0.687766 | -0.159727   | 0.0105613  | 1.13E-51    | 21889.1 | 0.288867  | -0.288694  | 0.0148999 | 1.24E-83 | -0.0466513  |
| 11 | rs11036693  | 5305564   | C | 0.898085 | -0.120586   | 0.0227752  | 1.19E-07    | 11131.3 | 0.102661  | -0.246248  | 0.0240122 | 1.12E-24 | -0.105579   |
| 11 | rs11036849  | 5326935   | G | 0.896379 | -0.0981772  | 0.0157179  | 4.21E-10    | 23048.1 | 0.105272  | -0.181057  | 0.0160215 | 1.30E-29 | -0.0502002  |
| 11 | rs12291806  | 5423831   | C | 0.809383 | -0.0733998  | 0.011365   | 1.06E-10    | 26543.6 | 0.183968  | -0.177613  | 0.0153705 | 6.93E-31 | 0.584294    |
| 11 | rs1498473   | 5423906   | T | 0.614433 | 0.0608757   | 0.0112423  | 6.13E-08    | 17664.3 | 0.398001  | 0.183336   | 0.015659  | 1.16E-31 | -0.400899   |
| 11 | rs425610    | 5472140   | A | 0.859033 | 0.0770389   | 0.0152367  | 4.28E-07    | 18819.3 | 0.851082  | 0.454717   | 0.0217718 | 7.24E-97 | 0.237957    |
| 11 | rs416586    | 5472327   | G | 0.7385   | -0.0649468  | 0.00983529 | 4.02E-11    | 28315.8 | 0.251932  | -0.157293  | 0.011565  | 3.96E-42 | 0.301425    |
| 11 | rs12283559  | 5483919   | T | 0.67156  | 0.00613764  | 0.0105305  | 0.559997    | 21659.9 | 0.333275  | 0.147175   | 0.015565  | 3.21E-21 | -0.0276657  |
| 11 | rs7120093   | 5612370   | G | 0.833508 | -0.0479908  | 0.0120223  | 6.56E-05    | 26396.9 | 0.166973  | -0.0842709 | 0.012141  | 3.89E-12 | 0           |
| 16 | rs45521934  | 16010632  | C | 0.82791  | -0.0610823  | 0.0130035  | 2.64E-06    | 21968.7 | 0.170911  | -0.269951  | 0.0226823 | 1.16E-32 | 0.261674    |
| 16 | rs3784863   | 16017098  | G | 0.746113 | -0.00429418 | 0.0105841  | 0.684947    | 24965.7 | 0.747051  | 0.264338   | 0.0184455 | 1.41E-46 | 0.180785    |
| 16 | rs7198872   | 16029343  | T | 0.907943 | -0.0404141  | 0.0170115  | 0.0175162   | 21897   | 0.0907437 | -0.201392  | 0.0244268 | 1.66E-16 | -0.321006   |
| 16 | rs997691    | 16030857  | T | 0.517818 | -0.0387204  | 0.00991168 | 9.36E-05    | 21582.9 | 0.508441  | -0.418765  | 0.0226882 | 4.55E-76 | -0.40269    |
| 16 | rs246230    | 16039023  | T | 0.859133 | -0.0272164  | 0.0150698  | 0.0709151   | 19272.7 | 0.141038  | -0.166622  | 0.018609  | 3.43E-19 | 0.307376    |
| 16 | rs165975    | 16040137  | C | 0.761309 | -0.0720865  | 0.0131723  | 4.44E-08    | 16773   | 0.242242  | -0.20365   | 0.0178007 | 2.62E-30 | 0           |
| 2  | rs6545363   | 53721936  | C | 0.586771 | 0.0228257   | 0.0105966  | 0.0312354   | 19453.8 | 0.59401   | 0.102462   | 0.0127072 | 7.42E-16 | 0.469097    |
| 2  | rs111607747 | 53759561  | T | 0.741508 | -0.080857   | 0.0144953  | 2.43E-08    | 13123.9 | 0.245208  | -0.102374  | 0.0164543 | 4.92E-10 | 0.562327    |
| 2  | rs805430    | 53848279  | C | 0.505587 | -0.0284315  | 0.00937235 | 0.0024169   | 24118.4 | 0.499081  | -0.361068  | 0.023799  | 5.45E-52 | 0.920122    |
| 2  | rs1363062   | 54054625  | C | 0.497278 | 0.0319515   | 0.00928769 | 0.000581287 | 24555.2 | 0.503335  | 0.457022   | 0.0256114 | 3.19E-71 | 0.813588    |
| 2  | rs11125524  | 54152396  | C | 0.50747  | -0.0246287  | 0.00911475 | 0.0068909   | 25505.8 | 0.492548  | -0.143076  | 0.0153031 | 8.81E-21 | -0.00264835 |
| 2  | rs243017    | 60361337  | G | 0.675159 | -0.0974998  | 0.0133213  | 2.50E-13    | 13559   | 0.668515  | -0.938569  | 0.0286537 | #####    | 0.278616    |
| 2  | rs55722188  | 60362347  | T | 0.856612 | -0.0397375  | 0.0198194  | 0.0449657   | 10976.9 | 0.138979  | 0.629138   | 0.0297256 | 2.01E-99 | 0.573455    |
| 2  | rs10176918  | 60364341  | A | 0.673505 | 0.0123955   | 0.0144995  | 0.392612    | 11459.5 | 0.327993  | 0.74214    | 0.0291939 | #####    | -0.454744   |

|   |            |          |   |          |            |           |           |         |           |           |           |          |             |
|---|------------|----------|---|----------|------------|-----------|-----------|---------|-----------|-----------|-----------|----------|-------------|
| 2 | rs243038   | 60371621 | T | 0.680169 | 0.0828915  | 0.0135512 | 9.54E-10  | 13224.8 | 0.304215  | 0.479033  | 0.027805  | 1.63E-66 | 0.72551     |
| 2 | rs243035   | 60374241 | C | 0.533781 | 0.098443   | 0.0138034 | 9.91E-13  | 11122.8 | 0.452733  | 0.76549   | 0.0253151 | #####    | 0.315191    |
| 2 | rs243058   | 60396670 | T | 0.584092 | -0.102761  | 0.0137192 | 6.87E-14  | 11531.1 | 0.571964  | -1.31357  | 0.0255547 | 0        | 0.541329    |
| 2 | rs17027944 | 60409479 | A | 0.70655  | 0.133841   | 0.0126459 | 3.54E-26  | 15866.3 | 0.281663  | 0.877736  | 0.0199271 | 0        | -0.124575   |
| 2 | rs10180309 | 60425652 | A | 0.964992 | 0.0711188  | 0.0303938 | 0.0192884 | 16970.8 | 0.0385744 | 0.383309  | 0.0352628 | 1.60E-27 | -0.0264114  |
| 2 | rs56207419 | 60433679 | T | 0.989458 | -0.282598  | 0.0290949 | 2.65E-22  | 59903.1 | 0.0129003 | -0.282464 | 0.0294262 | 8.07E-22 | 0.0914271   |
| 2 | rs9789627  | 60462613 | A | 0.58964  | -0.0652434 | 0.0136848 | 1.86E-06  | 11669.3 | 0.574662  | 0.772233  | 0.0233371 | #####    | -0.598384   |
| 2 | rs7570641  | 60478097 | A | 0.735992 | 0.00696419 | 0.014893  | 0.64006   | 12292.8 | 0.259898  | 3.32714   | 0.0426546 | 0        | 0.463206    |
| 2 | rs7579014  | 60480759 | G | 0.630832 | -0.244699  | 0.0136349 | 5.10E-72  | 11914.9 | 0.616063  | -2.83522  | 0.0307392 | 0        | 0.413307    |
| 2 | rs13019832 | 60483436 | A | 0.58242  | 0.300865   | 0.013036  | 7.44E-118 | 12286.1 | 0.405023  | 3.74389   | 0.0366631 | 0        | 0.371461    |
| 2 | rs1427407  | 60490908 | T | 0.841846 | -0.465351  | 0.0155614 | 1.73E-196 | 15538   | 0.827292  | -2.65629  | 0.029095  | 0        | 0.468287    |
| 2 | rs6729815  | 60496537 | T | 0.534637 | -0.0751441 | 0.0123987 | 1.36E-09  | 13815.2 | 0.523501  | 1.63575   | 0.0242085 | 0        | 0.542037    |
| 2 | rs7560588  | 60500281 | A | 0.716149 | 0.0223749  | 0.014668  | 0.127153  | 12111.5 | 0.270793  | 0.673936  | 0.0281176 | #####    | -0.418461   |
| 2 | rs6709302  | 60500494 | A | 0.673792 | 0.262872   | 0.0137858 | 4.62E-81  | 12319.7 | 0.322454  | 0.836344  | 0.026425  | #####    | 0.0105314   |
| 2 | rs10184550 | 60502159 | G | 0.546633 | -0.0881294 | 0.012993  | 1.18E-11  | 12617.4 | 0.548034  | -0.608114 | 0.0171748 | #####    | 0.0745459   |
| 2 | rs2665668  | 60541843 | G | 0.630777 | -0.0738373 | 0.014164  | 1.86E-07  | 11311.9 | 0.621311  | -0.196507 | 0.017911  | 5.25E-28 | -0.545409   |
| 2 | rs3771270  | 60542320 | A | 0.848108 | -0.155963  | 0.0156881 | 2.75E-23  | 16611.3 | 0.154936  | -1.67387  | 0.0353073 | 0        | -0.940809   |
| 2 | rs971563   | 60547638 | T | 0.836635 | -0.159695  | 0.0160468 | 2.48E-23  | 14954.3 | 0.83289   | -1.36108  | 0.0372849 | #####    | 0.00633835  |
| 2 | rs4564760  | 61021440 | C | 0.815215 | -0.0336183 | 0.0171569 | 0.0500585 | 11944.3 | 0.178377  | -0.128319 | 0.0175991 | 3.07E-13 | -0.167955   |
| 2 | rs74657713 | 61652584 | G | 0.782959 | 0.0381923  | 0.0139401 | 0.0061487 | 16035.8 | 0.21096   | 0.0962779 | 0.0142196 | 1.28E-11 | -0.00956178 |
| 2 | rs13417156 | 62621184 | C | 0.56374  | 0.0225396  | 0.0106209 | 0.0338209 | 19092.1 | 0.408665  | 0.0530047 | 0.0106429 | 6.35E-07 | 0           |



**Supplementary Table 7. Conditionally-independent identified signals from THAI population MAMA meta-analysis**

| Chr | SNP        | bp        | refA | freq     | b           | se        | p           | n       | freq_gen0 | bj        | bj_se     | pj       | LD_r       |
|-----|------------|-----------|------|----------|-------------|-----------|-------------|---------|-----------|-----------|-----------|----------|------------|
| 4   | rs349818   | 131958021 | C    | 0.615085 | 0.147242    | 0.0285473 | 2.50E-07    | 1738.54 | 0.410507  | 0.147242  | 0.0287568 | 3.05E-07 | 0          |
| 17  | rs3027171  | 8152681   | A    | 0.785293 | 0.0601976   | 0.0347381 | 0.0831132   | 1670.92 | 0.192795  | 0.260411  | 0.0413372 | 2.98E-10 | -0.280038  |
| 17  | rs8078338  | 8225842   | G    | 0.741251 | 0.165536    | 0.0317477 | 1.85E-07    | 1734.56 | 0.324842  | 1.24606   | 0.0837881 | 5.04E-50 | 0.232159   |
| 17  | rs3826543  | 8229445   | C    | 0.54423  | 0.149696    | 0.0287655 | 1.95E-07    | 1632.33 | 0.362101  | 1.11905   | 0.0646043 | 3.23E-67 | -0.14454   |
| 17  | rs3027238  | 8231743   | T    | 0.974802 | 0.110866    | 0.0907904 | 0.22204     | 1680.67 | 0.968857  | 2.01706   | 0.110627  | 2.83E-74 | 0.0732719  |
| 17  | rs4792621  | 8234419   | G    | 0.643655 | -0.16201    | 0.0296177 | 4.50E-08    | 1662.83 | 0.726049  | -2.1047   | 0.0725126 | #####    | 0.369438   |
| 17  | rs11650557 | 8247500   | G    | 0.72716  | 0.019887    | 0.0308189 | 0.518743    | 1806.89 | 0.286961  | 1.92314   | 0.0731227 | #####    | -0.337231  |
| 17  | rs1132554  | 8270449   | T    | 0.711709 | 0.148427    | 0.0303184 | 9.80E-07    | 1781.79 | 0.346225  | 1.18982   | 0.0663556 | 6.76E-72 | 0.268989   |
| 17  | rs8071444  | 8273259   | G    | 0.574361 | 0.125627    | 0.0287194 | 1.22E-05    | 1669.92 | 0.374241  | 1.60214   | 0.0780211 | 1.06E-93 | 0.101927   |
| 17  | rs62063151 | 8286344   | T    | 0.904605 | -0.00996464 | 0.0489322 | 0.838633    | 1648.33 | 0.107577  | 2.13049   | 0.0854632 | #####    | -0.110788  |
| 17  | rs62063152 | 8292345   | C    | 0.535184 | 0.114266    | 0.0287643 | 7.11E-05    | 1638.98 | 0.649776  | 2.54951   | 0.0863419 | #####    | 0.200213   |
| 17  | rs3744650  | 8327131   | T    | 0.637805 | 0.0683259   | 0.0291533 | 0.0190948   | 1729.14 | 0.592505  | 0.256232  | 0.0337659 | 3.24E-14 | 0          |
| 6   | rs11154170 | 123454048 | T    | 0.899997 | -0.0095899  | 0.0465876 | 0.83691     | 1743.45 | 0.171553  | 1.65442   | 0.0587728 | #####    | 0.212175   |
| 6   | rs9490806  | 123542434 | A    | 0.882771 | 0.069165    | 0.0431491 | 0.10895     | 1765.03 | 0.221738  | 1.87405   | 0.0576735 | #####    | -0.0216783 |
| 6   | rs79200844 | 125213817 | G    | 0.926084 | -0.0754569  | 0.0526834 | 0.152066    | 1790.51 | 0.0666755 | -0.294671 | 0.053017  | 2.73E-08 | -0.0331972 |
| 6   | rs574385   | 127515359 | A    | 0.885486 | -0.0695684  | 0.0433211 | 0.108301    | 1787.06 | 0.226301  | -1.67449  | 0.0567356 | #####    | 0.195654   |
| 6   | rs4296905  | 128843764 | C    | 0.974407 | -0.130357   | 0.0939206 | 0.165153    | 1546.42 | 0.0671859 | -2.83912  | 0.11137   | #####    | -0.226528  |
| 6   | rs9321263  | 130977773 | C    | 0.894375 | 0.0972414   | 0.0426036 | 0.0224618   | 1980.9  | 0.771119  | 2.12889   | 0.0617903 | #####    | 0.235829   |
| 6   | rs4897555  | 131967326 | C    | 0.984635 | 0.223054    | 0.0978538 | 0.0226399   | 2345.38 | 0.960269  | 1.89897   | 0.106675  | 6.87E-71 | 0.243917   |
| 6   | rs1338935  | 132405056 | G    | 0.924672 | 0.0433574   | 0.0526066 | 0.409836    | 1766.12 | 0.779245  | 3.00455   | 0.0849235 | #####    | -0.272452  |
| 6   | rs6569914  | 133885833 | G    | 0.945649 | 0.00075509  | 0.0574862 | 0.98952     | 2005.01 | 0.0847861 | 2.11691   | 0.075763  | #####    | 0.233206   |
| 6   | rs229915   | 134005925 | T    | 0.913931 | 0.0818445   | 0.0527512 | 0.120777    | 1553.62 | 0.127013  | 1.90207   | 0.0674759 | #####    | 0.0388517  |
| 6   | rs12198373 | 134033170 | T    | 0.757845 | 0.0211032   | 0.0328327 | 0.520385    | 1721.18 | 0.295803  | 1.31967   | 0.0439376 | #####    | -0.132388  |
| 6   | rs9389163  | 134367312 | A    | 0.664037 | -0.0757662  | 0.0302239 | 0.0121819   | 1664.96 | 0.254817  | -0.787481 | 0.0348164 | #####    | 0.0707904  |
| 6   | rs9493946  | 134414965 | T    | 0.93313  | 0.134149    | 0.0557387 | 0.0160953   | 1751.01 | 0.112196  | 0.368846  | 0.056572  | 7.03E-11 | 0.0465998  |
| 6   | rs1040637  | 134502781 | A    | 0.854481 | 0.0261674   | 0.0410222 | 0.523549    | 1627.28 | 0.835577  | -1.80432  | 0.0592569 | #####    | 0.0934609  |
| 6   | rs9389217  | 134739168 | T    | 0.723857 | -0.0909585  | 0.0293658 | 0.00195204  | 1966.08 | 0.239704  | -0.557875 | 0.0316322 | 1.30E-69 | 0.0628408  |
| 6   | rs4896106  | 134815775 | C    | 0.786693 | 0.0998856   | 0.03745   | 0.00764921  | 1440.16 | 0.792821  | 0.429283  | 0.0479303 | 3.35E-19 | 0.327875   |
| 6   | rs36053180 | 134819511 | C    | 0.748061 | -0.124299   | 0.0312555 | 6.41E-05    | 1833.78 | 0.278907  | -1.26261  | 0.0454142 | #####    | 0.343691   |
| 6   | rs7744034  | 134822610 | A    | 0.720313 | 0.13261     | 0.0340873 | 0.000100113 | 1439.94 | 0.715153  | 0.863637  | 0.057293  | 2.40E-51 | 0.49146    |
| 6   | rs9402657  | 134849369 | T    | 0.549027 | -0.0545415  | 0.0311833 | 0.0802804   | 1411.7  | 0.417524  | -0.655343 | 0.0484442 | 1.07E-41 | -0.270426  |
| 6   | rs742103   | 134862095 | C    | 0.870292 | 0.215006    | 0.0409445 | 1.51E-07    | 1772.05 | 0.140538  | 1.78714   | 0.0652761 | #####    | -0.229424  |
| 6   | rs9389237  | 134882641 | C    | 0.809854 | -0.195844   | 0.0322888 | 1.32E-09    | 2084.36 | 0.219979  | -1.40964  | 0.0636817 | #####    | -0.867447  |
| 6   | rs6899500  | 134905951 | T    | 0.803261 | -0.2639     | 0.0336749 | 4.62E-15    | 1838.94 | 0.765637  | -3.65006  | 0.0789075 | 0        | 0.233978   |
| 6   | rs6917170  | 134908719 | G    | 0.815342 | 0.122569    | 0.0351339 | 0.000485499 | 1820.32 | 0.150211  | 1.30175   | 0.0539414 | #####    | 0.3208     |
| 6   | rs9321479  | 134912771 | A    | 0.66296  | -0.101632   | 0.0271751 | 0.000184088 | 2049.8  | 0.628794  | 1.56429   | 0.0645638 | #####    | 0.585995   |
| 6   | rs2072827  | 134932465 | A    | 0.533479 | 0.0113757   | 0.0284344 | 0.689105    | 1692.4  | 0.445632  | 0.915122  | 0.0523659 | 2.20E-68 | 0.516375   |
| 6   | rs1022491  | 134938228 | C    | 0.763986 | -0.173334   | 0.0301738 | 9.22E-09    | 2041.4  | 0.719715  | -3.62459  | 0.0815078 | 0        | -0.921689  |
| 6   | rs61738647 | 134961597 | C    | 0.760245 | -0.189419   | 0.0292052 | 8.83E-11    | 2148.32 | 0.279905  | -1.62164  | 0.0715593 | #####    | 0.519557   |

|    |            |           |   |          |            |           |             |         |           |           |           |          |            |
|----|------------|-----------|---|----------|------------|-----------|-------------|---------|-----------|-----------|-----------|----------|------------|
| 6  | rs2297339  | 135054853 | G | 0.550798 | -0.0724919 | 0.0267864 | 0.00680393  | 1911.03 | 0.55252   | -1.1509   | 0.0510812 | #####    | 0.382074   |
| 6  | rs13220662 | 135074410 | A | 0.765918 | -0.299213  | 0.0319799 | 8.26E-21    | 1769.81 | 0.274947  | -0.737634 | 0.0488176 | 1.39E-51 | 0.531783   |
| 6  | rs9389263  | 135079427 | G | 0.509466 | 0.198798   | 0.0239749 | 1.11E-16    | 2301.8  | 0.553444  | 1.28439   | 0.0351448 | #####    | 0.435115   |
| 6  | rs7776054  | 135097778 | G | 0.846982 | -0.819242  | 0.032793  | 9.54E-138   | 1819.11 | 0.211061  | -2.83582  | 0.0601609 | 0        | 0.407139   |
| 6  | rs6930223  | 135103065 | G | 0.560797 | 0.152209   | 0.0262666 | 6.84E-09    | 1970.44 | 0.585247  | 1.02293   | 0.0416146 | #####    | 0.250057   |
| 6  | rs9389272  | 135138699 | A | 0.839219 | -0.564774  | 0.0328745 | 3.77E-66    | 2040.05 | 0.203669  | -0.566006 | 0.0477156 | 1.86E-32 | 0.00835574 |
| 6  | rs1320960  | 135177063 | C | 0.536382 | -0.103619  | 0.0264483 | 8.94E-05    | 1942.4  | 0.508052  | -1.66421  | 0.0528005 | #####    | 0.370022   |
| 6  | rs6920829  | 135198362 | C | 0.916955 | -0.411615  | 0.0471128 | 2.40E-18    | 1938.51 | 0.123647  | 2.16362   | 0.0798693 | #####    | -0.312794  |
| 6  | rs9321493  | 135205630 | T | 0.526682 | 0.296686   | 0.0289869 | 1.38E-24    | 1521.27 | 0.416579  | 2.72656   | 0.0661131 | 0        | -0.805713  |
| 6  | rs1013891  | 135217501 | A | 0.547283 | 0.224908   | 0.0294142 | 2.07E-14    | 1530.4  | 0.625924  | 2.30656   | 0.0535613 | 0        | -0.0376063 |
| 6  | rs12212642 | 137367252 | T | 0.651068 | -0.0631011 | 0.0277052 | 0.0227512   | 1947.79 | 0.342529  | -0.596069 | 0.0303964 | 1.27E-85 | -0.116202  |
| 6  | rs17071950 | 142674685 | T | 0.977031 | -0.105895  | 0.0896143 | 0.237335    | 1888.28 | 0.0694481 | -1.78793  | 0.141778  | 1.84E-36 | 0.858764   |
| 6  | rs77952533 | 142684755 | T | 0.967428 | -0.0663201 | 0.0659357 | 0.314498    | 2484.59 | 0.0809134 | -1.68822  | 0.104574  | 1.26E-58 | 0.25631    |
| 6  | rs12194419 | 142827005 | A | 0.891752 | -0.0533297 | 0.0436899 | 0.222222    | 1846.81 | 0.129493  | -1.34457  | 0.0531595 | #####    | 0.275016   |
| 6  | rs6902635  | 142953134 | T | 0.887057 | -0.0166869 | 0.0453947 | 0.713175    | 1649.58 | 0.212381  | -1.85344  | 0.0610616 | #####    | 0.123217   |
| 6  | rs72990459 | 143255288 | T | 0.966647 | -0.0697004 | 0.0728967 | 0.338995    | 1986.86 | 0.0527983 | -1.96097  | 0.0817486 | #####    | 0.0818305  |
| 6  | rs9321898  | 143283377 | G | 0.856689 | 0.107184   | 0.0405177 | 0.00816021  | 1682.78 | 0.755676  | 1.60946   | 0.0510578 | #####    | -0.17507   |
| 6  | rs12206643 | 148437484 | T | 0.950993 | 0.217632   | 0.0645667 | 0.000749916 | 1741.56 | 0.105729  | 2.77552   | 0.0841053 | #####    | 0          |
| 11 | rs11603658 | 1452757   | T | 0.942401 | 0.161337   | 0.0675322 | 0.0168927   | 1370.26 | 0.163675  | 1.13813   | 0.0772937 | 4.47E-49 | 0.208298   |
| 11 | rs12365876 | 4393834   | C | 0.978962 | 0.0932113  | 0.108106  | 0.388564    | 1414.43 | 0.05      | 1.27686   | 0.116734  | 7.56E-28 | 0.092476   |
| 11 | rs7104808  | 4731619   | A | 0.74354  | 0.0899387  | 0.0343526 | 0.00884199  | 1506.74 | 0.284758  | 0.390279  | 0.0363882 | 7.73E-27 | 0.0204027  |
| 11 | rs11034685 | 4925115   | T | 0.689547 | -0.18217   | 0.0378749 | 1.51E-06    | 1086.28 | 0.311814  | -0.40197  | 0.0393927 | 1.90E-24 | 0.102619   |
| 11 | rs12801574 | 4926366   | A | 0.915067 | 0.237556   | 0.0635551 | 0.000185643 | 1071.29 | 0.118805  | 1.01894   | 0.0742951 | 8.29E-43 | 0.158207   |
| 11 | rs840711   | 4931228   | C | 0.722596 | -0.300322  | 0.0340078 | 1.04E-18    | 1391.26 | 0.774444  | -6.30711  | 0.102434  | 0        | 0.0592932  |
| 11 | rs16907558 | 4937472   | T | 0.986746 | -0.106411  | 0.131201  | 0.417335    | 1512.34 | 0.028135  | 2.75184   | 0.161023  | 1.77E-65 | -0.0490741 |
| 11 | rs12282202 | 4939128   | T | 0.754905 | -0.335133  | 0.035105  | 1.34E-21    | 1402.66 | 0.203297  | -6.45989  | 0.106858  | 0        | 0.0264314  |
| 11 | rs2596002  | 4940771   | T | 0.474456 | -0.143283  | 0.0294836 | 1.18E-06    | 1547.74 | 0.589874  | -3.12994  | 0.0878671 | #####    | -0.91335   |
| 11 | rs3850509  | 4959562   | T | 0.490697 | -0.140186  | 0.0294152 | 1.88E-06    | 1552.39 | 0.432762  | -3.07044  | 0.0875589 | #####    | 0.655515   |
| 11 | rs1368822  | 4965727   | T | 0.539504 | -0.193931  | 0.0302305 | 1.41E-10    | 1459.03 | 0.393383  | -0.659668 | 0.0422359 | 5.44E-55 | -0.027383  |
| 11 | rs7105088  | 4987473   | T | 0.887148 | 0.0274656  | 0.044276  | 0.535043    | 1734.91 | 0.169033  | -0.797765 | 0.0531787 | 7.17E-51 | -0.207719  |
| 11 | rs2445292  | 5000634   | A | 0.7042   | -0.22768   | 0.0333023 | 8.10E-12    | 1427.66 | 0.198634  | -0.893964 | 0.0579629 | 1.15E-53 | -0.175396  |
| 11 | rs1840638  | 5054075   | T | 0.879636 | 0.105075   | 0.043253  | 0.0151281   | 1713.52 | 0.16007   | 1.18462   | 0.0580109 | 1.10E-92 | -0.314206  |
| 11 | rs11035386 | 5058123   | G | 0.575483 | 0.0929048  | 0.027895  | 0.000866861 | 1780.44 | 0.356779  | 0.90129   | 0.0411144 | #####    | -0.391452  |
| 11 | rs7116353  | 5060712   | C | 0.861197 | 0.117398   | 0.0415086 | 0.00468001  | 1645.68 | 0.223473  | 0.985068  | 0.0589786 | 1.27E-62 | 0.225115   |
| 11 | rs6578548  | 5067264   | A | 0.747559 | -0.319099  | 0.0355269 | 2.66E-19    | 1349.36 | 0.842352  | -2.22957  | 0.0673801 | #####    | 0.0853908  |
| 11 | rs2499954  | 5139284   | A | 0.500038 | 0.05225    | 0.0310612 | 0.0925376   | 1409.36 | 0.454594  | 0.394456  | 0.03324   | 1.76E-32 | -0.031536  |
| 11 | rs7105270  | 5193391   | C | 0.725126 | 0.215758   | 0.0420488 | 2.88E-07    | 940.522 | 0.803055  | 0.571827  | 0.0452701 | 1.42E-36 | 0.265881   |
| 11 | rs7479815  | 5193641   | A | 0.775163 | -0.537026  | 0.0489524 | 5.31E-28    | 695.647 | 0.230305  | -0.735403 | 0.0586961 | 5.18E-36 | -0.0142387 |
| 11 | rs6578581  | 5193710   | G | 0.631507 | -0.357095  | 0.0420744 | 2.12E-17    | 755.234 | 0.381029  | -0.485499 | 0.046112  | 6.37E-26 | 0.302507   |
| 11 | rs12805013 | 5203070   | T | 0.965126 | 0.336443   | 0.0722574 | 3.22E-06    | 1916.27 | 0.081034  | 0.540887  | 0.0798879 | 1.28E-11 | 0.195454   |
| 11 | rs34220818 | 5215621   | T | 0.511009 | -0.166891  | 0.0300889 | 2.91E-08    | 1474.84 | 0.394561  | -0.300769 | 0.0319335 | 4.57E-21 | -0.011997  |
| 11 | rs7948668  | 5235417   | A | 0.638653 | -0.42085   | 0.0360811 | 1.95E-31    | 997.914 | 0.68261   | -5.77809  | 0.0911894 | 0        | -0.727882  |

|    |            |          |   |          |            |           |             |         |           |           |           |          |             |
|----|------------|----------|---|----------|------------|-----------|-------------|---------|-----------|-----------|-----------|----------|-------------|
| 11 | rs10128556 | 5242453  | T | 0.758386 | -0.648846  | 0.0400906 | 6.49E-59    | 894.82  | 0.195658  | -4.48394  | 0.0958717 | 0        | 0.800725    |
| 11 | rs12284340 | 5259051  | T | 0.8393   | -0.643689  | 0.0449655 | 1.76E-46    | 1044.24 | 0.1388    | -1.79055  | 0.0805423 | #####    | 0.109174    |
| 11 | rs3759067  | 5270962  | C | 0.89575  | 0.487531   | 0.0569511 | 1.12E-17    | 1051.54 | 0.86981   | 9.38647   | 0.12149   | 0        | 0.481171    |
| 11 | rs11036562 | 5272915  | C | 0.588742 | -0.304972  | 0.0322188 | 2.92E-21    | 1265.67 | 0.605679  | -2.61436  | 0.0756635 | #####    | 0.850396    |
| 11 | rs11036634 | 5287498  | C | 0.610706 | -0.298626  | 0.0310381 | 6.50E-22    | 1394.58 | 0.643852  | -3.84284  | 0.0741166 | 0        | -0.772604   |
| 11 | rs11036635 | 5287666  | A | 0.688565 | -0.411109  | 0.0322122 | 2.67E-37    | 1367.85 | 0.250603  | -5.79336  | 0.0845312 | 0        | 0.175654    |
| 11 | rs10742615 | 5303747  | G | 0.919033 | 0.430882   | 0.052393  | 1.97E-16    | 1599.76 | 0.87731   | 3.0531    | 0.0728405 | 0        | 0.0105345   |
| 11 | rs11036693 | 5305564  | C | 0.983002 | -0.0225933 | 0.132307  | 0.86441     | 1164.67 | 0.0348245 | -1.85013  | 0.145484  | 4.75E-37 | 0.0650431   |
| 11 | rs10837784 | 5308417  | C | 0.617267 | 0.113475   | 0.0307292 | 0.000221833 | 1513.15 | 0.647602  | 1.92156   | 0.0575249 | #####    | 0.444253    |
| 11 | rs4459335  | 5313482  | T | 0.701819 | -0.265646  | 0.0319492 | 9.20E-17    | 1525.32 | 0.256699  | -1.66473  | 0.056586  | #####    | 0.0343651   |
| 11 | rs11036766 | 5314713  | C | 0.486277 | -0.189733  | 0.0303447 | 4.04E-10    | 1441.65 | 0.439309  | -0.293137 | 0.034425  | 1.66E-17 | -0.0671013  |
| 11 | rs12283931 | 5320457  | G | 0.916737 | 0.072357   | 0.038298  | 0.0588499   | 3037.73 | 0.117466  | -0.682179 | 0.0482537 | 2.24E-45 | -0.0991041  |
| 11 | rs77311317 | 5321683  | G | 0.793465 | -0.376216  | 0.0365249 | 7.03E-25    | 1451.82 | 0.10477   | -0.509527 | 0.0508458 | 1.23E-23 | 0.563674    |
| 11 | rs3886221  | 5322707  | C | 0.692393 | -0.225445  | 0.0322283 | 2.65E-12    | 1490.72 | 0.256833  | -1.46156  | 0.0611695 | #####    | 0.118098    |
| 11 | rs11036870 | 5331576  | T | 0.793356 | 0.146689   | 0.0488907 | 0.00269673  | 860.602 | 0.289255  | 0.769092  | 0.0564407 | 2.78E-42 | 0.416563    |
| 11 | rs4269953  | 5336651  | C | 0.880827 | -0.463133  | 0.044279  | 1.33E-25    | 1545.47 | 0.108894  | -0.966001 | 0.0517484 | 9.14E-78 | 0.0206359   |
| 11 | rs6578608  | 5338961  | T | 0.46495  | -0.135136  | 0.0303053 | 8.23E-06    | 1470.91 | 0.370881  | -0.369248 | 0.0336252 | 4.70E-28 | 0.197521    |
| 11 | rs7481498  | 5402545  | A | 0.448635 | -0.056957  | 0.0279894 | 0.0418561   | 1753.34 | 0.449357  | -0.294465 | 0.0338527 | 3.37E-18 | 0.262394    |
| 11 | rs2736579  | 5429157  | A | 0.666278 | 0.156426   | 0.0300069 | 1.86E-07    | 1673.95 | 0.299893  | 1.83059   | 0.0663826 | #####    | -0.165308   |
| 11 | rs9665744  | 5429418  | A | 0.896581 | -0.399427  | 0.0429555 | 1.42E-20    | 1904.01 | 0.0618971 | -0.793344 | 0.0501834 | 2.70E-56 | 0.184546    |
| 11 | rs10742678 | 5441915  | G | 0.635325 | 0.161371   | 0.0294891 | 4.44E-08    | 1660.49 | 0.65872   | 2.23713   | 0.0663726 | #####    | 0.263192    |
| 11 | rs2002785  | 5450297  | G | 0.93646  | -0.119854  | 0.0648657 | 0.0646413   | 1357.15 | 0.167917  | -1.23141  | 0.0872635 | 3.23E-45 | -0.127254   |
| 11 | rs10838144 | 5459672  | G | 0.475811 | -0.185378  | 0.0292055 | 2.19E-10    | 1560.68 | 0.470667  | -0.63041  | 0.035553  | 2.39E-70 | 0.163831    |
| 11 | rs369934   | 5472279  | T | 0.724026 | 0.162743   | 0.0328633 | 7.34E-07    | 1553.8  | 0.712698  | 2.22095   | 0.078833  | #####    | -0.774898   |
| 11 | rs12577059 | 5488459  | C | 0.765458 | 0.159283   | 0.034865  | 4.91E-06    | 1539.84 | 0.250737  | 1.99084   | 0.0772246 | #####    | 0.122113    |
| 11 | rs379616   | 5491803  | G | 0.949999 | -0.0427488 | 0.065263  | 0.512453    | 1682.97 | 0.947079  | -1.83299  | 0.0988469 | 9.16E-77 | 0.0408639   |
| 11 | rs11037877 | 5505934  | T | 0.843837 | 0.131035   | 0.0424423 | 0.00201938  | 1425.4  | 0.1618    | 0.349642  | 0.051125  | 7.98E-12 | 0.140649    |
| 11 | rs1433567  | 5523282  | G | 0.556858 | -0.0696315 | 0.0296694 | 0.0189296   | 1562.46 | 0.591396  | -0.38486  | 0.0380038 | 4.20E-24 | -0.561931   |
| 11 | rs60009475 | 5551794  | G | 0.74354  | -0.0744343 | 0.0328839 | 0.0236019   | 1646.6  | 0.236539  | -0.511542 | 0.0410831 | 1.37E-35 | 0.0653622   |
| 11 | rs11038527 | 5647879  | T | 0.840067 | 0.127855   | 0.0425139 | 0.00263515  | 1393.64 | 0.132601  | 1.18116   | 0.0607871 | 4.22E-84 | -0.322899   |
| 11 | rs12787432 | 5660295  | G | 0.555358 | 0.129343   | 0.0318162 | 4.80E-05    | 1346.19 | 0.577706  | 0.395626  | 0.0351721 | 2.36E-29 | -0.195176   |
| 11 | rs2880345  | 5672317  | G | 0.788117 | -0.189877  | 0.0366408 | 2.19E-07    | 1492.41 | 0.831412  | -2.3919   | 0.0809496 | #####    | -0.894296   |
| 11 | rs3740996  | 5680051  | A | 0.824031 | -0.271113  | 0.0384758 | 1.84E-12    | 1537.01 | 0.148272  | -2.15459  | 0.0850764 | #####    | 0.335369    |
| 11 | rs12799329 | 5683076  | A | 0.507545 | -0.111747  | 0.0298596 | 0.000182252 | 1514.41 | 0.476159  | -0.426497 | 0.0348663 | 2.09E-34 | 0.393283    |
| 11 | rs7932268  | 5687278  | A | 0.770605 | 0.173808   | 0.0373006 | 3.17E-06    | 1363.23 | 0.8236    | 1.41605   | 0.0582458 | #####    | 0.20849     |
| 11 | rs10838546 | 5696983  | A | 0.771937 | -0.21092   | 0.0375547 | 1.95E-08    | 1340.34 | 0.287379  | -1.16874  | 0.0539365 | #####    | -0.544639   |
| 11 | rs10838548 | 5697865  | A | 0.51823  | -0.0532245 | 0.0364085 | 0.143777    | 1027.35 | 0.561479  | -0.612548 | 0.0485357 | 1.63E-36 | 0.0751554   |
| 11 | rs970725   | 5736330  | G | 0.906936 | -0.0888649 | 0.0486007 | 0.0674789   | 1705    | 0.157916  | -0.663693 | 0.0547981 | 9.17E-34 | -0.0781914  |
| 11 | rs11041339 | 7382315  | C | 0.681585 | -0.0783609 | 0.0303085 | 0.00972537  | 1701.67 | 0.214439  | -0.244384 | 0.031033  | 3.41E-15 | -0.035094   |
| 11 | rs11021890 | 11520149 | T | 0.972328 | 0.128665   | 0.0849515 | 0.129882    | 1751.65 | 0.0526386 | 0.657454  | 0.0915865 | 7.05E-13 | 0.0465687   |
| 11 | rs11021930 | 11558847 | G | 0.52584  | 0.0572042  | 0.0287593 | 0.0466935   | 1647.6  | 0.559068  | 0.224029  | 0.0295077 | 3.15E-14 | -0.00755786 |
| 11 | rs2403569  | 12058704 | C | 0.529739 | -0.0648361 | 0.0283289 | 0.0220975   | 1698.32 | 0.584003  | -0.233003 | 0.0285923 | 3.66E-16 | -0.00690184 |

|    |            |          |   |          |            |           |             |         |           |           |           |          |            |
|----|------------|----------|---|----------|------------|-----------|-------------|---------|-----------|-----------|-----------|----------|------------|
| 11 | rs2101888  | 14932569 | C | 0.679754 | 0.0423036  | 0.0297414 | 0.154915    | 1766.67 | 0.635816  | 0.582143  | 0.0418028 | 4.41E-44 | -0.682597  |
| 11 | rs10832323 | 14938680 | C | 0.86862  | 0.0155377  | 0.0416343 | 0.709003    | 1721.56 | 0.219721  | 2.93713   | 0.0898325 | #####    | 0.80011    |
| 11 | rs1114462  | 15096139 | T | 0.871524 | -0.0177229 | 0.0417686 | 0.671338    | 1743.28 | 0.19274   | -1.95658  | 0.0741244 | #####    | -0.0799174 |
| 11 | rs2271830  | 15240145 | A | 0.715939 | 0.00724767 | 0.0318663 | 0.820082    | 1649.16 | 0.69917   | -0.385495 | 0.0345898 | 7.60E-29 | 0.110519   |
| 11 | rs2271828  | 15240280 | A | 0.973786 | 0.0352075  | 0.0862031 | 0.682962    | 1795.26 | 0.058532  | 1.39869   | 0.0966599 | 1.87E-47 | 0.0886697  |
| 11 | rs10832401 | 15307933 | T | 0.826913 | -0.0539698 | 0.0353776 | 0.127126    | 1898.8  | 0.234396  | -0.345342 | 0.0377952 | 6.41E-20 | 0.104083   |
| 11 | rs10833345 | 20519165 | T | 0.748748 | -0.0736143 | 0.0315364 | 0.0195818   | 1814.81 | 0.323813  | -0.378753 | 0.0332802 | 5.22E-30 | 0          |
| 2  | rs7567375  | 50389150 | T | 0.554742 | -0.0482255 | 0.0271314 | 0.0754896   | 1869.89 | 0.371602  | -0.459827 | 0.0310789 | 1.57E-49 | 0.429094   |
| 2  | rs2139628  | 50452963 | T | 0.869238 | 0.0162192  | 0.0397024 | 0.682893    | 1900.65 | 0.765839  | 1.72779   | 0.0632812 | #####    | 0.256689   |
| 2  | rs985919   | 50459875 | C | 0.880064 | 0.0387681  | 0.0435639 | 0.373512    | 1699.43 | 0.76122   | 0.932911  | 0.0490922 | 1.60E-80 | -0.284728  |
| 2  | rs10211332 | 50478448 | T | 0.893155 | 0.0413567  | 0.0442571 | 0.350063    | 1821.16 | 0.177798  | 1.51253   | 0.0650626 | #####    | 0.115106   |
| 2  | rs243089   | 60341556 | C | 0.809105 | -0.145574  | 0.0317124 | 4.42E-06    | 2171.25 | 0.220243  | -0.213255 | 0.0336236 | 2.26E-10 | -0.0441041 |
| 2  | rs76110954 | 60432400 | T | 0.812541 | 0.141282   | 0.0386714 | 0.000258784 | 1481.93 | 0.134468  | 0.96223   | 0.0461927 | 2.28E-96 | 0.233752   |
| 2  | rs7599856  | 60447499 | T | 0.730956 | -0.377903  | 0.0365368 | 4.50E-25    | 1190.57 | 0.715624  | -3.54968  | 0.0819656 | 0        | -0.667955  |
| 2  | rs17331129 | 60452807 | C | 0.774516 | -0.38712   | 0.0379421 | 1.92E-24    | 1250.77 | 0.18255   | -4.59541  | 0.088245  | 0        | -0.429202  |
| 2  | rs12621957 | 60455312 | A | 0.661202 | -0.189618  | 0.0336775 | 1.80E-08    | 1309    | 0.680306  | -0.609389 | 0.0391771 | 1.48E-54 | -0.0192849 |
| 2  | rs9789627  | 60462613 | A | 0.895679 | -0.0293208 | 0.0533021 | 0.58226     | 1282.89 | 0.822908  | 4.54375   | 0.1047    | 0        | 0.0622184  |
| 2  | rs7599488  | 60491212 | C | 0.756824 | -0.259828  | 0.0354037 | 2.15E-13    | 1422.68 | 0.705331  | 2.07028   | 0.0784714 | #####    | -0.235119  |
| 2  | rs1896294  | 60491939 | T | 0.923614 | 0.762911   | 0.0532092 | 1.27E-46    | 1499.49 | 0.186461  | 3.02789   | 0.0963866 | #####    | 0.240583   |
| 2  | rs766432   | 60492835 | C | 0.779308 | -0.538561  | 0.0361888 | 4.31E-50    | 1290.72 | 0.798892  | -3.30791  | 0.086923  | 0        | 0.120738   |
| 2  | rs6709302  | 60500494 | A | 0.978985 | 1.12019    | 0.115531  | 3.14E-22    | 1146.5  | 0.0830034 | 2.15874   | 0.173595  | 1.68E-35 | 0.210175   |
| 2  | rs6724431  | 60509702 | T | 0.949977 | 0.151652   | 0.0642941 | 0.0183378   | 1728.21 | 0.131336  | -0.6468   | 0.0794763 | 4.01E-16 | 0          |

| Supplementary Table 8. Results of genetic correlation analysis |         |         |        |         |        |           |        |           |           |             |
|----------------------------------------------------------------|---------|---------|--------|---------|--------|-----------|--------|-----------|-----------|-------------|
| Trait 1                                                        | Trait 2 | rg      | se     | z-score | h2_obs | h2_obs_se | h2_int | h2_int_se | gcov_int  | gcov_int_se |
| HBF                                                            | BAS     | 0.1756  | 0.0678 | 2.5891  | 0.0626 | 0.0077    | 1.1314 | 0.0355    | -1.82E-02 | 0.0067      |
| HBF                                                            | EOS     | 0.0871  | 0.0627 | 1.3896  | 0.2098 | 0.0228    | 1.2508 | 0.0813    | 1.66E-02  | 0.0088      |
| HBF                                                            | HCT     | 0.0174  | 0.1199 | 0.1455  | 0.1494 | 0.0143    | 1.4483 | 0.103     | 8.05E-03  | 0.0098      |
| HBF                                                            | HGB     | 0.0105  | 0.0836 | 0.1255  | 0.1563 | 0.017     | 1.4482 | 0.1101    | 9.69E-03  | 0.01        |
| HBF                                                            | LYM     | 0.0427  | 0.0667 | 0.6402  | 0.2128 | 0.0174    | 1.3209 | 0.0695    | 1.78E-02  | 0.0082      |
| HBF                                                            | MCH     | -0.1053 | 0.1462 | -0.7207 | 0.2904 | 0.035     | 1.237  | 0.1306    | -6.66E-03 | 0.0108      |
| HBF                                                            | MON     | 0.0181  | 0.0563 | 0.321   | 0.1904 | 0.0233    | 1.6649 | 0.1801    | 2.11E-02  | 0.009       |
| HBF                                                            | MPV     | -0.0038 | 0.0351 | -0.1075 | 0.3137 | 0.0357    | 1.4269 | 0.1378    | -7.49E-04 | 0.0082      |
| HBF                                                            | NEU     | 0.068   | 0.0486 | 1.4007  | 0.1566 | 0.012     | 1.324  | 0.0574    | 5.93E-03  | 0.008       |
| HBF                                                            | PLT     | 0.0047  | 0.1317 | 0.0359  | 0.2941 | 0.0239    | 1.3828 | 0.0844    | 7.52E-03  | 0.0083      |
| HBF                                                            | RBC     | 0.0717  | 0.139  | 0.5156  | 0.2133 | 0.0177    | 1.5012 | 0.0994    | 1.73E-02  | 0.0113      |
| HBF                                                            | MCHC    | -0.0288 | 0.1567 | -0.1837 | 0.1097 | 0.0162    | 1.0771 | 0.0618    | 7.76E-05  | 0.0075      |
| HBF                                                            | RDW     | 0.0765  | 0.1247 | 0.6139  | 0.2333 | 0.0229    | 1.1406 | 0.0961    | -3.65E-03 | 0.0085      |
| HBF                                                            | MCV     | -0.136  | 0.138  | -0.9854 | 0.2892 | 0.0313    | 1.3474 | 0.1478    | -9.42E-03 | 0.0119      |
| HBF                                                            | WBC     | 0.0676  | 0.0589 | 1.148   | 0.1902 | 0.0134    | 1.3834 | 0.0607    | 1.47E-02  | 0.0085      |

**Supplementary Table 9. Finemapping posterior probabilities from FINEMAP (see Methods) for fixed-effects meta-analysis results.**

| locus         | SNP         | CHR | BP        | A1 | A2 | PIP        | BETA_MEAN  | BETA_SD   | DISTANCE_FRO | CREDIBLE_SET |
|---------------|-------------|-----|-----------|----|----|------------|------------|-----------|--------------|--------------|
| chr2q11.2     | rs11123805  | 2   | 100027002 | G  | A  | 1          | 0.512283   | 0.0164807 | 3115         | 1            |
| chr2q11.2     | rs11685341  | 2   | 100020295 | C  | T  | 1          | 0.512283   | 0.0164807 | 3592         | 2            |
| chr6q15_2     | rs62408211  | 6   | 90193089  | A  | T  | 1          | -3.18909   | 0.0400895 | 15250        | 5            |
| chr6q15_2     | rs2174281   | 6   | 90278153  | T  | C  | 1          | -3.18909   | 0.0400895 | 69814        | 4            |
| chr6q15_2     | rs7754251   | 6   | 90279406  | C  | G  | 1          | -3.18909   | 0.0400895 | 71067        | 3            |
| chr6q15_2     | rs9344994   | 6   | 90190824  | C  | T  | 1          | -3.18909   | 0.0400895 | 17515        | 6            |
| chr6q15_2     | rs17712288  | 6   | 90199438  | G  | A  | 1          | -3.18909   | 0.0400927 | 8901         | 7            |
| chr6q15_2     | rs9344999   | 6   | 90268017  | T  | G  | 0.994586   | -3.17021   | 0.235625  | 59678        | 2            |
| chr6q15_2     | rs12209546  | 6   | 90202875  | T  | C  | 0.990269   | -3.15758   | 0.314006  | 5464         | 1            |
| chr6q15_2     | rs4706358   | 6   | 90203525  | G  | A  | 0.00735928 | -0.0243823 | 0.284569  | 4814         | 0            |
| chr6q15_2     | rs55817481  | 6   | 90261380  | T  | C  | 0.00458176 | -0.0163677 | 0.241454  | 53041        | 0            |
| chr6q15_2     | rs10806424  | 6   | 90202582  | T  | G  | 0.00237208 | -0.0071349 | 0.146326  | 5757         | 0            |
| chr2p16.1-p15 | rs144993807 | 2   | 60931808  | C  | A  | 1          | -1.46171   | 5.96E-08  | 2237         | 0            |
| chr2p16.1-p15 | rs13019832  | 2   | 60483436  | G  | A  | 1          | -1.46171   | 5.96E-08  | 446135       | 0            |
| chr2p16.1-p15 | rs149298049 | 2   | 60627236  | C  | A  | 1          | -1.46171   | 5.96E-08  | 302335       | 0            |
| chr2p16.1-p15 | rs1427407   | 2   | 60490908  | G  | T  | 1          | -1.46171   | 5.96E-08  | 438663       | 0            |
| chr2p16.1-p15 | rs7593947   | 2   | 60477798  | A  | T  | 1          | -1.46171   | 5.96E-08  | 451773       | 0            |
| chr2p16.1-p15 | rs535400153 | 2   | 61058639  | A  | G  | 1          | -1.46171   | 5.96E-08  | 129068       | 0            |
| chr2p16.1-p15 | rs540268133 | 2   | 61233873  | G  | A  | 1          | -1.46171   | 5.96E-08  | 304302       | 0            |
| chr2p16.1-p15 | rs1123573   | 2   | 60480453  | A  | G  | 1          | -1.46171   | 5.96E-08  | 449118       | 0            |
| chr2p16.1-p15 | rs574054518 | 2   | 61070659  | A  | G  | 1          | -1.46171   | 5.96E-08  | 141088       | 0            |
| chr2p16.1-p15 | rs76673     | 2   | 60521943  | G  | T  | 1          | -1.46171   | 5.96E-08  | 407628       | 0            |
| chr17p13.1    | rs62063152  | 17  | 8292345   | C  | T  | 1          | 0.668732   | 0.0218527 | 2221         | 6            |
| chr17p13.1    | rs6416894   | 17  | 8294345   | C  | T  | 1          | 0.668732   | 0.0218527 | 4221         | 1            |
| chr17p13.1    | rs369784434 | 17  | 8257196   | C  | T  | 1          | 0.668732   | 0.0218527 | 32928        | 3            |
| chr17p13.1    | rs9889238   | 17  | 8278649   | A  | G  | 1          | 0.668732   | 0.0218527 | 11475        | 4            |
| chr17p13.1    | rs12951103  | 17  | 8269414   | G  | A  | 1          | 0.668732   | 0.0218527 | 20710        | 2            |
| chr17p13.1    | rs62063145  | 17  | 8280622   | A  | G  | 0.999996   | 0.668729   | 0.0218917 | 9502         | 7            |
| chr17p13.1    | rs6503098   | 17  | 8291001   | C  | T  | 0.859234   | 0.567468   | 0.229799  | 877          | 5            |
| chr17p13.1    | rs11652218  | 17  | 8280565   | T  | C  | 0.140766   | 0.101264   | 0.250196  | 9559         | 5            |

|                |             |    |           |   |   |            |            |            |        |    |
|----------------|-------------|----|-----------|---|---|------------|------------|------------|--------|----|
| chr5p13.1      | rs16868193  | 5  | 39152178  | C | T | 0.909954   | 0.286976   | 0.0916008  | 15661  | 1  |
| chr5p13.1      | rs1549690   | 5  | 39157692  | C | A | 0.865309   | 0.272986   | 0.108762   | 21175  | 2  |
| chr5p13.1      | rs7724197   | 5  | 39163801  | C | T | 0.132462   | 0.0414694  | 0.106292   | 27284  | 2  |
| chr5p13.1      | rs6882511   | 5  | 39154838  | C | T | 0.0699032  | 0.0219172  | 0.0800628  | 18321  | 1  |
| chr5p13.1      | rs12658684  | 5  | 39165431  | T | G | 0.020122   | 0.00623683 | 0.0435832  | 28914  | 0  |
| chr5p13.1      | rs7724020   | 5  | 39163750  | A | T | 0.00222437 | 0.00067954 | 0.0144122  | 27233  | 0  |
| chr11p15.4     | rs7119142   | 11 | 5287848   | A | G | 1          | 1.73E-06   | 9.54E-08   | 35479  | 5  |
| chr11p15.4     | rs142062445 | 11 | 5047195   | C | T | 1          | 1.73E-06   | 9.54E-08   | 276132 | 11 |
| chr11p15.4     | rs112176573 | 11 | 5276199   | G | A | 1          | 1.73E-06   | 9.54E-08   | 47128  | 4  |
| chr11p15.4     | rs7948416   | 11 | 5235201   | C | A | 1          | 1.73E-06   | 9.54E-08   | 88126  | 2  |
| chr11p15.4     | rs141236619 | 11 | 5519839   | A | C | 1          | 1.73E-06   | 9.54E-08   | 196512 | 9  |
| chr11p15.4     | rs2855039   | 11 | 5250441   | C | T | 1          | 1.73E-06   | 9.54E-08   | 72886  | 3  |
| chr11p15.4     | rs552229329 | 11 | 5347745   | A | G | 1          | 1.73E-06   | 9.54E-08   | 24418  | 12 |
| chr11p15.4     | rs2402324   | 11 | 5283512   | C | T | 1          | 1.73E-06   | 9.54E-08   | 39815  | 6  |
| chr11p15.4     | rs535093719 | 11 | 5475006   | A | G | 1          | 1.73E-06   | 9.54E-08   | 151679 | 8  |
| chr11p15.4     | rs840717    | 11 | 4933455   | T | C | 1          | 1.73E-06   | 9.54E-08   | 389872 | 13 |
| chr11p15.4     | rs968856    | 11 | 5239346   | C | T | 1          | 1.73E-06   | 9.54E-08   | 83981  | 1  |
| chr11p15.4     | rs111991670 | 11 | 5277817   | T | C | 1          | 1.73E-06   | 9.54E-08   | 45510  | 7  |
| chr11p15.4     | rs58194033  | 11 | 5820015   | C | T | 1          | 1.73E-06   | 9.54E-08   | 496688 | 10 |
| chr6q23.2-q23. | rs79393802  | 6  | 134886859 | C | A | 1          | 0.987833   | 0.00144838 | 144975 | 3  |
| chr6q23.2-q23. | rs1411919   | 6  | 135110923 | A | G | 1          | 0.987833   | 0.00144838 | 79089  | 6  |
| chr6q23.2-q23. | rs13209279  | 6  | 134941427 | G | A | 1          | 0.987833   | 0.00144838 | 90407  | 2  |
| chr6q23.2-q23. | rs7743042   | 6  | 135098696 | G | A | 1          | 0.987833   | 0.00144838 | 66862  | 5  |
| chr6q23.2-q23. | rs7772031   | 6  | 134938596 | A | G | 1          | 0.987833   | 0.00144838 | 93238  | 1  |
| chr6q23.2-q23. | rs7776054   | 6  | 135097778 | A | G | 1          | 0.987833   | 0.00144838 | 65944  | 4  |
| chr19p13.2-p13 | rs552598641 | 19 | 11357574  | T | G | 0.999998   | 0.097007   | 0.0101947  | 441199 | 1  |
| chr19p13.2-p13 | rs567246061 | 19 | 11392350  | G | A | 0.978578   | 0.0950326  | 0.0172898  | 406423 | 2  |
| chr19p13.2-p13 | rs141019468 | 19 | 11400067  | G | A | 0.0214222  | 0.00197448 | 0.013426   | 398706 | 0  |
| chr14q21.1     | rs112345505 | 14 | 38016989  | T | A | 0.916889   | 0.0280132  | 0.0102202  | 82     | 1  |
| chr14q21.1     | rs77112100  | 14 | 37933206  | T | C | 0.00344438 | 7.91E-05   | 0.00139097 | 83865  | 1  |
| chr14q21.1     | rs80039584  | 14 | 37889584  | G | A | 0.00172851 | 3.78E-05   | 0.00094126 | 127487 | 1  |
| chr14q21.1     | rs73260797  | 14 | 37845355  | A | T | 0.00122531 | -2.61E-05  | 0.00077311 | 171716 | 1  |
| chr5q14.3      | rs57811114  | 5  | 87801921  | C | T | 0.527962   | 0.0158492  | 0.0156133  | 284    | 1  |

|           |             |    |          |   |   |            |            |            |        |   |
|-----------|-------------|----|----------|---|---|------------|------------|------------|--------|---|
| chr5q14.3 | rs16902826  | 5  | 87801681 | A | G | 0.291066   | 0.00852506 | 0.0136965  | 524    | 1 |
| chr5q14.3 | rs62368090  | 5  | 88028282 | A | G | 0.023937   | 0.00062241 | 0.00408249 | 226077 | 1 |
| chr5q14.3 | rs62368085  | 5  | 88023168 | G | A | 0.0200162  | 0.00051543 | 0.00370602 | 220963 | 1 |
| chr5q14.3 | rs62369514  | 5  | 88010038 | G | A | 0.0105867  | 0.00026292 | 0.00261632 | 207833 | 1 |
| chr5q14.3 | rs62368144  | 5  | 88085541 | G | A | 0.0105005  | 0.00026065 | 0.00260457 | 283336 | 1 |
| chr5q14.3 | rs62368079  | 5  | 88012262 | G | A | 0.00826546 | 0.00020225 | 0.00228221 | 210057 | 1 |
| chr5q14.3 | rs563654442 | 5  | 88107908 | C | T | 0.00759678 | -0.0001849 | 0.00217805 | 305703 | 1 |
| chr5q14.3 | rs62369510  | 5  | 87995999 | G | C | 0.0075664  | 0.00018415 | 0.00217322 | 193794 | 1 |
| chr5q14.3 | rs62368613  | 5  | 87955467 | C | T | 0.00624994 | 0.00015031 | 0.0019544  | 153262 | 1 |
| chr5q14.3 | rs62369509  | 5  | 87995998 | G | T | 0.00548752 | 0.00013089 | 0.00181782 | 193793 | 1 |
| chr5q14.3 | rs62369461  | 5  | 87966191 | G | A | 0.00540206 | 0.00012872 | 0.00180198 | 163986 | 1 |
| chr5q14.3 | rs112330486 | 5  | 88024600 | C | T | 0.00429346 | 0.00010079 | 0.00158494 | 222395 | 1 |
| chr5q14.3 | rs75834175  | 5  | 87970453 | A | T | 0.00399025 | 9.32E-05   | 0.00152123 | 168248 | 1 |
| chr5q14.3 | rs62369512  | 5  | 88001752 | C | A | 0.00382522 | 8.91E-05   | 0.00148562 | 199547 | 1 |
| chr5q14.3 | rs62368089  | 5  | 88025746 | C | T | 0.00361182 | 8.38E-05   | 0.00143851 | 223541 | 1 |
| chr5q14.3 | rs62368083  | 5  | 88018041 | A | C | 0.00346342 | 8.01E-05   | 0.00140501 | 215836 | 1 |
| chr5q14.3 | rs62369465  | 5  | 87983229 | T | A | 0.00201445 | 4.49E-05   | 0.00103464 | 181024 | 1 |
| chr5q14.3 | rs62368602  | 5  | 87928984 | A | G | 0.0014751  | 3.21E-05   | 0.00086653 | 126779 | 1 |
| chr5q14.3 | rs62368143  | 5  | 88077257 | T | C | 0.00144894 | 3.15E-05   | 0.00085772 | 275052 | 1 |
| chr5q14.3 | rs62369466  | 5  | 87988141 | A | G | 0.00141315 | 3.06E-05   | 0.00084556 | 185936 | 1 |
| chr5q14.3 | rs62367645  | 5  | 87908719 | G | A | 0.001354   | 2.93E-05   | 0.00082515 | 106514 | 0 |
| chr5q14.3 | rs113251119 | 5  | 87967261 | C | T | 0.00121319 | 2.60E-05   | 0.0007749  | 165056 | 0 |
| chr5q14.3 | rs62368605  | 5  | 87936375 | C | T | 0.00114677 | 2.45E-05   | 0.00075029 | 134170 | 0 |
| chr5q14.3 | rs62368601  | 5  | 87928665 | G | A | 0.00112288 | 2.39E-05   | 0.00074129 | 126460 | 0 |
| chr6q15   | rs1796735   | 6  | 89138857 | C | T | 1          | 0.425528   | 0.208301   | 18763  | 1 |
| chr6q15   | rs9351205   | 6  | 89155908 | G | A | 1          | 0.425528   | 0.208301   | 1712   | 2 |
| chr6q15   | rs9451159   | 6  | 89133137 | G | T | 0.896583   | 0.379112   | 0.236306   | 24483  | 3 |
| chr6q15   | rs9342181   | 6  | 89159014 | G | A | 0.599985   | 0.346825   | 0.283363   | 1394   | 4 |
| chr6q15   | rs10944427  | 6  | 89071405 | T | C | 0.346588   | 0.0495047  | 0.0684068  | 86215  | 4 |
| chr6q15   | rs9451158   | 6  | 89132848 | G | C | 0.103417   | 0.046416   | 0.150807   | 24772  | 3 |
| chr6q15   | rs9451170   | 6  | 89169079 | T | C | 0.0489589  | 0.0284723  | 0.125521   | 11459  | 4 |
| chr6q15   | rs6907604   | 6  | 89063880 | G | A | 0.00312129 | 0.00040052 | 0.00719364 | 93740  | 0 |
| chr17q22  | rs147381196 | 17 | 58308282 | T | C | 0.872881   | -0.0257018 | 0.0113104  | 57     | 1 |



|            |             |    |          |   |   |            |            |            |        |    |
|------------|-------------|----|----------|---|---|------------|------------|------------|--------|----|
| chr17q22   | rs780518974 | 17 | 58771492 | C | T | 0.015517   | -0.0003717 | 0.00305448 | 463267 | 1  |
| chr17q22   | rs148402166 | 17 | 58190873 | G | T | 0.00497013 | -0.0001101 | 0.00161519 | 117352 | 1  |
| chr17q22   | rs199909371 | 17 | 58370967 | C | T | 0.00287763 | 6.11E-05   | 0.00118295 | 62742  | 1  |
| chr17q22   | rs761985722 | 17 | 58644414 | A | C | 0.00274999 | 5.82E-05   | 0.00115256 | 336189 | 1  |
| chr17q22   | rs575945971 | 17 | 58104327 | C | A | 0.00253891 | 5.34E-05   | 0.0011009  | 203898 | 1  |
| chr17q22   | rs751058558 | 17 | 58762514 | A | G | 0.00241074 | -5.05E-05  | 0.00106858 | 454289 | 1  |
| chr17q22   | rs536048333 | 17 | 58294758 | A | G | 0.00227389 | 4.74E-05   | 0.00103321 | 13467  | 1  |
| chr17q22   | rs557949455 | 17 | 58428500 | G | A | 0.00128755 | 2.55E-05   | 0.00074284 | 120275 | 1  |
| chr17q22   | rs539867779 | 17 | 58428488 | C | T | 0.00128755 | 2.55E-05   | 0.00074284 | 120263 | 1  |
| chr17q22   | rs189287733 | 17 | 58299584 | G | A | 0.00120256 | 2.37E-05   | 0.00071377 | 8641   | 1  |
| chr17q22   | rs144635826 | 17 | 58206373 | T | C | 0.00120256 | 2.37E-05   | 0.00071377 | 101852 | 1  |
| chr19p13.3 | rs350830    | 19 | 4071152  | G | A | 1          | 1.74632    | 0.0227894  | 23034  | 4  |
| chr19p13.3 | rs59394312  | 19 | 4070165  | C | G | 1          | 1.74632    | 0.0227894  | 22047  | 5  |
| chr19p13.3 | rs350832    | 19 | 4069428  | A | G | 1          | 1.74632    | 0.0227894  | 21310  | 1  |
| chr19p13.3 | rs7245642   | 19 | 4053015  | A | G | 1          | 1.74632    | 0.0227894  | 4897   | 2  |
| chr19p13.3 | rs7256295   | 19 | 4071816  | G | A | 1          | 1.74632    | 0.0227894  | 23698  | 7  |
| chr19p13.3 | rs895331    | 19 | 4060224  | A | C | 1          | 1.74632    | 0.0227894  | 12106  | 9  |
| chr19p13.3 | rs72976987  | 19 | 4052922  | C | T | 1          | 1.74632    | 0.0227894  | 4804   | 3  |
| chr19p13.3 | rs7247173   | 19 | 4053498  | T | C | 1          | 1.74632    | 0.0227894  | 5380   | 6  |
| chr19p13.3 | rs113232187 | 19 | 4072161  | A | G | 0.744014   | 1.29846    | 0.761886   | 24043  | 8  |
| chr19p13.3 | rs113872022 | 19 | 4073558  | A | T | 0.249049   | 0.435688   | 0.756637   | 25440  | 8  |
| chr19p13.3 | rs77828924  | 19 | 4077768  | C | T | 0.00693136 | 0.0121599  | 0.145562   | 29650  | 0  |
| chr19p13.2 | rs12151303  | 19 | 12895873 | G | A | 1          | -0.436789  | 0.0197123  | 10002  | 5  |
| chr19p13.2 | rs2900660   | 19 | 12912045 | A | C | 1          | -0.436789  | 0.0197123  | 6170   | 4  |
| chr19p13.2 | rs62109862  | 19 | 12900995 | G | A | 1          | -0.436789  | 0.0197123  | 4880   | 3  |
| chr19p13.2 | rs1799918   | 19 | 12891586 | G | C | 1          | -0.436789  | 0.0197123  | 14289  | 8  |
| chr19p13.2 | rs2974750   | 19 | 12933730 | A | C | 1          | -0.436789  | 0.0197123  | 27855  | 1  |
| chr19p13.2 | rs2967896   | 19 | 12920466 | T | C | 1          | -0.436789  | 0.0197123  | 14591  | 2  |
| chr19p13.2 | rs575712931 | 19 | 12951265 | C | T | 0.999998   | -0.436789  | 0.0197199  | 45390  | 10 |
| chr19p13.2 | rs74359544  | 19 | 12916406 | A | G | 0.999997   | -0.436788  | 0.0197279  | 10531  | 6  |
| chr19p13.2 | rs146767365 | 19 | 12943029 | T | A | 0.883142   | -0.38638   | 0.14173    | 37154  | 7  |
| chr19p13.2 | rs150975396 | 19 | 12970791 | G | A | 0.843665   | -0.368546  | 0.159678   | 64916  | 9  |
| chr19p13.2 | rs140337637 | 19 | 12966917 | T | C | 0.156335   | -0.0682429 | 0.158722   | 61042  | 9  |

|            |             |    |          |   |   |           |            |           |       |   |
|------------|-------------|----|----------|---|---|-----------|------------|-----------|-------|---|
| chr19p13.2 | rs116992783 | 19 | 12931513 | C | T | 0.0798197 | -0.0344723 | 0.117174  | 25638 | 7 |
| chr19p13.2 | rs114439833 | 19 | 12916484 | G | A | 0.0243956 | -0.0104786 | 0.0663353 | 10609 | 0 |
| chr19p13.2 | rs115581760 | 19 | 12916438 | C | T | 0.0117372 | -0.0050803 | 0.046665  | 10563 | 0 |

**Supplementary Table 10. Trait Relevance Score (TRS) and Transcription Factor Motif correlation on the Erythro**

| name       | rho        | p.value   | fdr       | log10fdr   | posorneg | order |
|------------|------------|-----------|-----------|------------|----------|-------|
| GATA1_588  | 0.62887425 | 0         | 0         | Inf        | TRUE     | 1     |
| GATA2_600  | 0.62624007 | 0         | 0         | Inf        | TRUE     | 2     |
| GATA3_593  | 0.62492925 | 0         | 0         | Inf        | TRUE     | 3     |
| GATA4_598  | 0.62183601 | 0         | 0         | Inf        | TRUE     | 4     |
| GATA1_590  | 0.6174432  | 0         | 0         | Inf        | TRUE     | 5     |
| GATA2_601  | 0.60974981 | 0         | 0         | Inf        | TRUE     | 6     |
| GATA6_599  | 0.60870813 | 0         | 0         | Inf        | TRUE     | 7     |
| GATA5_596  | 0.60736653 | 0         | 0         | Inf        | TRUE     | 8     |
| LMO2_1335  | 0.59844001 | 0         | 0         | Inf        | TRUE     | 9     |
| MECOM_250  | 0.57664803 | 2.70E-297 | 4.75E-294 | 293.322882 | TRUE     | 10    |
| PRDM16_303 | 0.56576673 | 7.98E-284 | 1.41E-280 | 279.85141  | TRUE     | 11    |
| MECOM_253  | 0.56235884 | 1.04E-279 | 1.84E-276 | 275.734822 | TRUE     | 12    |
| GATA5_597  | 0.54971644 | 7.56E-265 | 1.33E-261 | 260.874799 | TRUE     | 13    |
| KLF2_1564  | 0.53791092 | 1.55E-251 | 2.74E-248 | 247.562222 | TRUE     | 14    |
| RHOXF1_631 | 0.52703813 | 9.82E-240 | 1.73E-236 | 235.761242 | TRUE     | 15    |
| NFIX_1189  | 0.52572318 | 2.46E-238 | 4.33E-235 | 234.363016 | TRUE     | 16    |
| NFIA_1194  | 0.52173983 | 3.88E-234 | 6.84E-231 | 230.164801 | TRUE     | 17    |
| KLF7_279   | 0.520615   | 5.81E-233 | 1.02E-229 | 228.989397 | TRUE     | 18    |
| NFIB_1193  | 0.51468583 | 7.71E-227 | 1.36E-223 | 222.866168 | TRUE     | 19    |
| MECOM_251  | 0.51063693 | 9.99E-223 | 1.76E-219 | 218.753874 | TRUE     | 20    |
| NFIC_1192  | 0.50448643 | 1.38E-216 | 2.44E-213 | 212.612357 | TRUE     | 21    |
| KLF4_300   | 0.50150415 | 1.19E-213 | 2.09E-210 | 209.679437 | TRUE     | 22    |
| KLF1_267   | 0.50055761 | 9.97E-213 | 1.76E-209 | 208.754638 | TRUE     | 23    |
| KLF2_1565  | 0.50055761 | 9.97E-213 | 1.76E-209 | 208.754638 | TRUE     | 24    |

|              |            |           |           |            |      |    |
|--------------|------------|-----------|-----------|------------|------|----|
| PRRX1_681    | 0.48499118 | 6.27E-198 | 1.11E-194 | 193.956168 | TRUE | 25 |
| KLF5_263     | 0.4582452  | 3.17E-174 | 5.59E-171 | 170.25236  | TRUE | 26 |
| KLF2_1566    | 0.4582452  | 3.17E-174 | 5.59E-171 | 170.25236  | TRUE | 27 |
| GATA1_591    | 0.45361606 | 2.48E-170 | 4.37E-167 | 166.359917 | TRUE | 28 |
| FOXF2_534    | 0.42615965 | 1.91E-148 | 3.36E-145 | 144.473411 | TRUE | 29 |
| SP3_351      | 0.42400006 | 8.27E-147 | 1.46E-143 | 142.836206 | TRUE | 30 |
| KLF3_274     | 0.42257991 | 9.71E-146 | 1.71E-142 | 141.766081 | TRUE | 31 |
| KLF2_1568    | 0.42257991 | 9.71E-146 | 1.71E-142 | 141.766081 | TRUE | 32 |
| FOXG1_553    | 0.4081121  | 3.98E-135 | 7.03E-132 | 131.153343 | TRUE | 33 |
| FOXJ2_519    | 0.39572417 | 1.90E-126 | 3.35E-123 | 122.474348 | TRUE | 34 |
| FOXP1_523    | 0.39572417 | 1.90E-126 | 3.35E-123 | 122.474348 | TRUE | 35 |
| FOXP4_533    | 0.39572417 | 1.90E-126 | 3.35E-123 | 122.474348 | TRUE | 36 |
| FOXK2_536    | 0.39572417 | 1.90E-126 | 3.35E-123 | 122.474348 | TRUE | 37 |
| FOXJ3_577    | 0.39572417 | 1.90E-126 | 3.35E-123 | 122.474348 | TRUE | 38 |
| FOXD4_1380   | 0.37358339 | 7.80E-112 | 1.38E-108 | 107.861207 | TRUE | 39 |
| FOXD4L1_1410 | 0.37358339 | 7.80E-112 | 1.38E-108 | 107.861207 | TRUE | 40 |
| FOXJ1_1584   | 0.37358339 | 7.80E-112 | 1.38E-108 | 107.861207 | TRUE | 41 |
| GATA3_594    | 0.36912225 | 5.03E-109 | 8.87E-106 | 105.051854 | TRUE | 42 |
| SP6_389      | 0.36762301 | 4.32E-108 | 7.63E-105 | 104.117658 | TRUE | 43 |
| SP5_393      | 0.36762301 | 4.32E-108 | 7.63E-105 | 104.117658 | TRUE | 44 |
| OLIG1_125    | 0.36575328 | 6.22E-107 | 1.10E-103 | 102.959574 | TRUE | 45 |
| FOXN3_1371   | 0.36235543 | 7.57E-105 | 1.33E-101 | 100.874674 | TRUE | 46 |
| FOXN2_1613   | 0.36235543 | 7.57E-105 | 1.33E-101 | 100.874674 | TRUE | 47 |
| FOXL2_1622   | 0.36235543 | 7.57E-105 | 1.33E-101 | 100.874674 | TRUE | 48 |
| KLF16_296    | 0.36166478 | 1.99E-104 | 3.52E-101 | 100.453983 | TRUE | 49 |
| MYB_994      | 0.36122759 | 3.68E-104 | 6.48E-101 | 100.188223 | TRUE | 50 |
| FOXO4_566    | 0.35865515 | 1.32E-102 | 2.33E-99  | 98.6328808 | TRUE | 51 |

|             |            |           |          |            |      |    |
|-------------|------------|-----------|----------|------------|------|----|
| FOXK1_543   | 0.35606267 | 4.72E-101 | 8.32E-98 | 97.0799231 | TRUE | 52 |
| AP5Z1_586   | 0.35606267 | 4.72E-101 | 8.32E-98 | 97.0799231 | TRUE | 53 |
| BHLHE23_73  | 0.35139154 | 2.72E-98  | 4.81E-95 | 94.3182728 | TRUE | 54 |
| GATA2_602   | 0.34388849 | 5.94E-94  | 1.05E-90 | 89.9794413 | TRUE | 55 |
| FOXO3_525   | 0.34372565 | 7.36E-94  | 1.30E-90 | 89.8865903 | TRUE | 56 |
| RFX7_1171   | 0.33452603 | 1.05E-88  | 1.86E-85 | 84.7305665 | TRUE | 57 |
| OLIG3_114   | 0.33180866 | 3.25E-87  | 5.74E-84 | 83.2409916 | TRUE | 58 |
| BHLHE22_121 | 0.3309463  | 9.60E-87  | 1.69E-83 | 82.7714295 | TRUE | 59 |
| SP4_268     | 0.33012015 | 2.69E-86  | 4.75E-83 | 82.3230045 | TRUE | 60 |
| LHX8_761    | 0.32866516 | 1.65E-85  | 2.91E-82 | 81.5366261 | TRUE | 61 |
| FOXO1_537   | 0.3282815  | 2.65E-85  | 4.68E-82 | 81.3299855 | TRUE | 62 |
| FOXE3_573   | 0.3282815  | 2.65E-85  | 4.68E-82 | 81.3299855 | TRUE | 63 |
| FOXD1_587   | 0.3282815  | 2.65E-85  | 4.68E-82 | 81.3299855 | TRUE | 64 |
| SP1_380     | 0.32631234 | 3.02E-84  | 5.32E-81 | 80.2740759 | TRUE | 65 |
| ATOH7_119   | 0.32567821 | 6.57E-84  | 1.16E-80 | 79.9357084 | TRUE | 66 |
| BHLHA15_120 | 0.32478278 | 1.97E-83  | 3.47E-80 | 79.4592934 | TRUE | 67 |
| FOXP2_531   | 0.32390966 | 5.72E-83  | 1.01E-79 | 78.9963024 | TRUE | 68 |
| LHX6_654    | 0.32325412 | 1.27E-82  | 2.24E-79 | 78.6496969 | TRUE | 69 |
| SP8_321     | 0.32296807 | 1.80E-82  | 3.17E-79 | 78.4987231 | TRUE | 70 |
| SP7_340     | 0.32296807 | 1.80E-82  | 3.17E-79 | 78.4987231 | TRUE | 71 |
| SP9_397     | 0.32296807 | 1.80E-82  | 3.17E-79 | 78.4987231 | TRUE | 72 |
| EVX1_646    | 0.32236082 | 3.76E-82  | 6.63E-79 | 78.1787616 | TRUE | 73 |
| FOXP3_509   | 0.32086539 | 2.29E-81  | 4.04E-78 | 77.3939697 | TRUE | 74 |
| FOXI1_546   | 0.32086539 | 2.29E-81  | 4.04E-78 | 77.3939697 | TRUE | 75 |
| FOXL1_558   | 0.32086539 | 2.29E-81  | 4.04E-78 | 77.3939697 | TRUE | 76 |
| FOXD2_571   | 0.32086539 | 2.29E-81  | 4.04E-78 | 77.3939697 | TRUE | 77 |
| FOXD3_576   | 0.32086539 | 2.29E-81  | 4.04E-78 | 77.3939697 | TRUE | 78 |

|              |            |          |          |            |      |     |
|--------------|------------|----------|----------|------------|------|-----|
| FOXO6_583    | 0.32086539 | 2.29E-81 | 4.04E-78 | 77.3939697 | TRUE | 79  |
| FOXD4L3_1440 | 0.32086539 | 2.29E-81 | 4.04E-78 | 77.3939697 | TRUE | 80  |
| FOXD4L5_1469 | 0.32086539 | 2.29E-81 | 4.04E-78 | 77.3939697 | TRUE | 81  |
| FOXD4L6_1498 | 0.32086539 | 2.29E-81 | 4.04E-78 | 77.3939697 | TRUE | 82  |
| FOXD4L4_1651 | 0.32086539 | 2.29E-81 | 4.04E-78 | 77.3939697 | TRUE | 83  |
| FOXD4L2_1680 | 0.32086539 | 2.29E-81 | 4.04E-78 | 77.3939697 | TRUE | 84  |
| FOXJ2_516    | 0.31616801 | 6.25E-79 | 1.10E-75 | 74.9577863 | TRUE | 85  |
| FOXN3_1375   | 0.31616801 | 6.25E-79 | 1.10E-75 | 74.9577863 | TRUE | 86  |
| FOXN2_1617   | 0.31616801 | 6.25E-79 | 1.10E-75 | 74.9577863 | TRUE | 87  |
| FOXL2_1624   | 0.31616801 | 6.25E-79 | 1.10E-75 | 74.9577863 | TRUE | 88  |
| EVX2_808     | 0.3143446  | 5.37E-78 | 9.46E-75 | 74.0238954 | TRUE | 89  |
| FOXD4_1384   | 0.31415372 | 6.71E-78 | 1.18E-74 | 73.926509  | TRUE | 90  |
| FOXD4L1_1414 | 0.31415372 | 6.71E-78 | 1.18E-74 | 73.926509  | TRUE | 91  |
| FOXJ1_1587   | 0.31415372 | 6.71E-78 | 1.18E-74 | 73.926509  | TRUE | 92  |
| RFX3_1159    | 0.31370221 | 1.14E-77 | 2.01E-74 | 73.6964455 | TRUE | 93  |
| ZSCAN16_391  | 0.31284121 | 3.12E-77 | 5.51E-74 | 73.2588338 | TRUE | 94  |
| FOXJ3_578    | 0.31112023 | 2.32E-76 | 4.09E-73 | 72.388495  | TRUE | 95  |
| NEUROD2_107  | 0.31038974 | 5.40E-76 | 9.53E-73 | 72.0208206 | TRUE | 96  |
| RFX2_1162    | 0.30936788 | 1.76E-75 | 3.10E-72 | 71.5082446 | TRUE | 97  |
| OLIG2_137    | 0.30918896 | 2.16E-75 | 3.81E-72 | 71.4187042 | TRUE | 98  |
| KLF14_357    | 0.30718791 | 2.15E-74 | 3.79E-71 | 70.4215538 | TRUE | 99  |
| KLF11_1571   | 0.30718791 | 2.15E-74 | 3.79E-71 | 70.4215538 | TRUE | 100 |
| TWIST2_138   | 0.30620982 | 6.55E-74 | 1.16E-70 | 69.9369867 | TRUE | 101 |
| FOXD3_575    | 0.30546563 | 1.53E-73 | 2.69E-70 | 69.5695396 | TRUE | 102 |
| THRB_1066    | 0.30172475 | 1.03E-71 | 1.83E-68 | 67.738694  | TRUE | 103 |
| ZNF232_332   | 0.30103249 | 2.24E-71 | 3.96E-68 | 67.4028409 | TRUE | 104 |
| RFX1_1166    | 0.30058065 | 3.71E-71 | 6.54E-68 | 67.1841293 | TRUE | 105 |

|              |            |          |          |            |      |     |
|--------------|------------|----------|----------|------------|------|-----|
| FOXF2_535    | 0.2993806  | 1.41E-70 | 2.48E-67 | 66.6051489 | TRUE | 106 |
| RFX4_1164    | 0.29648083 | 3.44E-69 | 6.06E-66 | 65.217469  | TRUE | 107 |
| FOXD4_1402   | 0.29636814 | 3.89E-69 | 6.86E-66 | 65.1638686 | TRUE | 108 |
| FOXD4L1_1432 | 0.29636814 | 3.89E-69 | 6.86E-66 | 65.1638686 | TRUE | 109 |
| FOXD4L3_1461 | 0.29636814 | 3.89E-69 | 6.86E-66 | 65.1638686 | TRUE | 110 |
| FOXD4L5_1490 | 0.29636814 | 3.89E-69 | 6.86E-66 | 65.1638686 | TRUE | 111 |
| FOXD4L6_1519 | 0.29636814 | 3.89E-69 | 6.86E-66 | 65.1638686 | TRUE | 112 |
| FOXJ1_1606   | 0.29636814 | 3.89E-69 | 6.86E-66 | 65.1638686 | TRUE | 113 |
| FOXL2_1643   | 0.29636814 | 3.89E-69 | 6.86E-66 | 65.1638686 | TRUE | 114 |
| FOXD4L4_1672 | 0.29636814 | 3.89E-69 | 6.86E-66 | 65.1638686 | TRUE | 115 |
| FOXD4L2_1701 | 0.29636814 | 3.89E-69 | 6.86E-66 | 65.1638686 | TRUE | 116 |
| FOXS1_565    | 0.29612778 | 5.06E-69 | 8.92E-66 | 65.0496139 | TRUE | 117 |
| RFX1_1168    | 0.29258837 | 2.36E-67 | 4.17E-64 | 63.3798929 | TRUE | 118 |
| RFX8_1173    | 0.29127724 | 9.69E-67 | 1.71E-63 | 62.7673814 | TRUE | 119 |
| GATA3_595    | 0.2906353  | 1.93E-66 | 3.40E-63 | 62.4686701 | TRUE | 120 |
| FOXA1_532    | 0.29002668 | 3.69E-66 | 6.51E-63 | 62.1861871 | TRUE | 121 |
| FOXL2_1623   | 0.29002668 | 3.69E-66 | 6.51E-63 | 62.1861871 | TRUE | 122 |
| REST_249     | 0.28950237 | 6.46E-66 | 1.14E-62 | 61.9433892 | TRUE | 123 |
| RFX2_1161    | 0.28839867 | 2.09E-65 | 3.68E-62 | 61.4339789 | TRUE | 124 |
| NEUROD4_1350 | 0.28584917 | 3.07E-64 | 5.42E-61 | 60.2659842 | TRUE | 125 |
| NEUROD6_1350 | 0.28584917 | 3.07E-64 | 5.42E-61 | 60.2659842 | TRUE | 126 |
| ATOH1_1560   | 0.28584917 | 3.07E-64 | 5.42E-61 | 60.2659842 | TRUE | 127 |
| SRF_983      | 0.28169839 | 2.31E-62 | 4.07E-59 | 58.3903325 | TRUE | 128 |
| FOXD2_570    | 0.2816922  | 2.32E-62 | 4.10E-59 | 58.3875601 | TRUE | 129 |
| FOXL2_1632   | 0.28115222 | 4.05E-62 | 7.15E-59 | 58.1459136 | TRUE | 130 |
| SRY_1256     | 0.27883157 | 4.36E-61 | 7.70E-58 | 57.1135312 | TRUE | 131 |
| KLF13_337    | 0.27867135 | 5.14E-61 | 9.07E-58 | 57.0426221 | TRUE | 132 |

|              |            |          |          |            |      |     |
|--------------|------------|----------|----------|------------|------|-----|
| KLF10_1366   | 0.27867135 | 5.14E-61 | 9.07E-58 | 57.0426221 | TRUE | 133 |
| ZFY_244      | 0.27712481 | 2.47E-60 | 4.36E-57 | 56.3605892 | TRUE | 134 |
| SP1_379      | 0.27253269 | 2.47E-58 | 4.35E-55 | 54.361295  | TRUE | 135 |
| DLX1_745     | 0.27203922 | 4.02E-58 | 7.10E-55 | 54.1487436 | TRUE | 136 |
| SOX9_1228    | 0.27189724 | 4.63E-58 | 8.17E-55 | 54.0876709 | TRUE | 137 |
| NFIA_1195    | 0.27100694 | 1.12E-57 | 1.97E-54 | 53.7055491 | TRUE | 138 |
| PBX3_789     | 0.26813244 | 1.87E-56 | 3.30E-53 | 52.4816217 | TRUE | 139 |
| PBX4_1719    | 0.26813244 | 1.87E-56 | 3.30E-53 | 52.4816217 | TRUE | 140 |
| NEUROG3_70   | 0.26746517 | 3.58E-56 | 6.31E-53 | 52.1996473 | TRUE | 141 |
| ZFX_233      | 0.26624685 | 1.17E-55 | 2.06E-52 | 51.6868867 | TRUE | 142 |
| MYBL1_1003   | 0.26432353 | 7.42E-55 | 1.31E-51 | 50.882858  | TRUE | 143 |
| SMAD3_1197   | 0.263004   | 2.62E-54 | 4.62E-51 | 50.3350887 | TRUE | 144 |
| SMAD9_1758   | 0.263004   | 2.62E-54 | 4.62E-51 | 50.3350887 | TRUE | 145 |
| RFX5_1170    | 0.26290485 | 2.88E-54 | 5.08E-51 | 50.2940537 | TRUE | 146 |
| RFX2_1160    | 0.26243406 | 4.51E-54 | 7.95E-51 | 50.0994583 | TRUE | 147 |
| RFX3_1158    | 0.26085409 | 2.01E-53 | 3.55E-50 | 49.4492981 | TRUE | 148 |
| FOXD4_1383   | 0.26044866 | 2.95E-53 | 5.21E-50 | 49.2831816 | TRUE | 149 |
| FOXD4L1_1412 | 0.26044866 | 2.95E-53 | 5.21E-50 | 49.2831816 | TRUE | 150 |
| FOXD4L3_1443 | 0.26044866 | 2.95E-53 | 5.21E-50 | 49.2831816 | TRUE | 151 |
| FOXD4L5_1472 | 0.26044866 | 2.95E-53 | 5.21E-50 | 49.2831816 | TRUE | 152 |
| FOXD4L6_1501 | 0.26044866 | 2.95E-53 | 5.21E-50 | 49.2831816 | TRUE | 153 |
| FOXJ1_1586   | 0.26044866 | 2.95E-53 | 5.21E-50 | 49.2831816 | TRUE | 154 |
| FOXD4L4_1654 | 0.26044866 | 2.95E-53 | 5.21E-50 | 49.2831816 | TRUE | 155 |
| FOXD4L2_1683 | 0.26044866 | 2.95E-53 | 5.21E-50 | 49.2831816 | TRUE | 156 |
| FOXF1_521    | 0.26035916 | 3.21E-53 | 5.67E-50 | 49.2465501 | TRUE | 157 |
| FOXD4_1382   | 0.26035916 | 3.21E-53 | 5.67E-50 | 49.2465501 | TRUE | 158 |
| FOXD4L1_1413 | 0.26035916 | 3.21E-53 | 5.67E-50 | 49.2465501 | TRUE | 159 |



|              |            |          |          |            |      |     |
|--------------|------------|----------|----------|------------|------|-----|
| FOXD4L3_1442 | 0.26035916 | 3.21E-53 | 5.67E-50 | 49.2465501 | TRUE | 160 |
| FOXD4L5_1471 | 0.26035916 | 3.21E-53 | 5.67E-50 | 49.2465501 | TRUE | 161 |
| FOXD4L6_1500 | 0.26035916 | 3.21E-53 | 5.67E-50 | 49.2465501 | TRUE | 162 |
| FOXJ1_1588   | 0.26035916 | 3.21E-53 | 5.67E-50 | 49.2465501 | TRUE | 163 |
| FOXD4L4_1653 | 0.26035916 | 3.21E-53 | 5.67E-50 | 49.2465501 | TRUE | 164 |
| FOXD4L2_1682 | 0.26035916 | 3.21E-53 | 5.67E-50 | 49.2465501 | TRUE | 165 |
| FOXB1_550    | 0.2600603  | 4.26E-53 | 7.51E-50 | 49.124334  | TRUE | 166 |
| FOXD4_1387   | 0.2600603  | 4.26E-53 | 7.51E-50 | 49.124334  | TRUE | 167 |
| FOXD4L1_1418 | 0.2600603  | 4.26E-53 | 7.51E-50 | 49.124334  | TRUE | 168 |
| FOXD4L3_1446 | 0.2600603  | 4.26E-53 | 7.51E-50 | 49.124334  | TRUE | 169 |
| FOXD4L5_1475 | 0.2600603  | 4.26E-53 | 7.51E-50 | 49.124334  | TRUE | 170 |
| FOXD4L6_1504 | 0.2600603  | 4.26E-53 | 7.51E-50 | 49.124334  | TRUE | 171 |
| FOXJ1_1592   | 0.2600603  | 4.26E-53 | 7.51E-50 | 49.124334  | TRUE | 172 |
| FOXD4L4_1657 | 0.2600603  | 4.26E-53 | 7.51E-50 | 49.124334  | TRUE | 173 |
| FOXD4L2_1686 | 0.2600603  | 4.26E-53 | 7.51E-50 | 49.124334  | TRUE | 174 |
| FOXA3_549    | 0.2598475  | 5.20E-53 | 9.17E-50 | 49.0374113 | TRUE | 175 |
| NFYB_1333    | 0.25932547 | 8.49E-53 | 1.50E-49 | 48.824512  | TRUE | 176 |
| TLX1_660     | 0.25856635 | 1.73E-52 | 3.05E-49 | 48.5157955 | TRUE | 177 |
| SOX2_1251    | 0.25839835 | 2.02E-52 | 3.57E-49 | 48.44761   | TRUE | 178 |
| MYBL1_1002   | 0.25762599 | 4.16E-52 | 7.33E-49 | 48.1347876 | TRUE | 179 |
| MYBL2_991    | 0.25736639 | 5.29E-52 | 9.34E-49 | 48.0298844 | TRUE | 180 |
| SOX4_1217    | 0.25710366 | 6.76E-52 | 1.19E-48 | 47.9238365 | TRUE | 181 |
| MXI1_66      | 0.25708283 | 6.89E-52 | 1.21E-48 | 47.9154342 | TRUE | 182 |
| MYBL1_1000   | 0.25554458 | 2.86E-51 | 5.05E-48 | 47.297058  | TRUE | 183 |
| FOXD4_1381   | 0.25528231 | 3.64E-51 | 6.43E-48 | 47.1920462 | TRUE | 184 |
| FOXD4L1_1411 | 0.25528231 | 3.64E-51 | 6.43E-48 | 47.1920462 | TRUE | 185 |
| FOXD4L3_1441 | 0.25528231 | 3.64E-51 | 6.43E-48 | 47.1920462 | TRUE | 186 |

|              |            |          |          |            |      |     |
|--------------|------------|----------|----------|------------|------|-----|
| FOXD4L5_1470 | 0.25528231 | 3.64E-51 | 6.43E-48 | 47.1920462 | TRUE | 187 |
| FOXD4L6_1499 | 0.25528231 | 3.64E-51 | 6.43E-48 | 47.1920462 | TRUE | 188 |
| FOXJ1_1585   | 0.25528231 | 3.64E-51 | 6.43E-48 | 47.1920462 | TRUE | 189 |
| FOXD4L4_1652 | 0.25528231 | 3.64E-51 | 6.43E-48 | 47.1920462 | TRUE | 190 |
| FOXD4L2_1681 | 0.25528231 | 3.64E-51 | 6.43E-48 | 47.1920462 | TRUE | 191 |
| NKX26_825    | 0.25477376 | 5.82E-51 | 1.03E-47 | 46.9887688 | TRUE | 192 |
| NEUROG1_122  | 0.25469316 | 6.26E-51 | 1.11E-47 | 46.9565926 | TRUE | 193 |
| FOXO3_528    | 0.25370104 | 1.56E-50 | 2.74E-47 | 46.5614831 | TRUE | 194 |
| RFX5_1169    | 0.25364804 | 1.63E-50 | 2.88E-47 | 46.5404229 | TRUE | 195 |
| FOXL1_557    | 0.25315457 | 2.56E-50 | 4.52E-47 | 46.3445919 | TRUE | 196 |
| FOXL2_1633   | 0.25315457 | 2.56E-50 | 4.52E-47 | 46.3445919 | TRUE | 197 |
| OTX1_674     | 0.25199632 | 7.36E-50 | 1.30E-46 | 45.8866392 | TRUE | 198 |
| OVOL1_350    | 0.24997253 | 4.59E-49 | 8.09E-46 | 45.0921388 | TRUE | 199 |
| OTX2_786     | 0.24969097 | 5.91E-49 | 1.04E-45 | 44.9821772 | TRUE | 200 |
| FOXO4_567    | 0.24966557 | 6.04E-49 | 1.07E-45 | 44.9722637 | TRUE | 201 |
| FOXD4_1396   | 0.24957763 | 6.54E-49 | 1.15E-45 | 44.9379496 | TRUE | 202 |
| FOXD4L1_1426 | 0.24957763 | 6.54E-49 | 1.15E-45 | 44.9379496 | TRUE | 203 |
| FOXD4L3_1455 | 0.24957763 | 6.54E-49 | 1.15E-45 | 44.9379496 | TRUE | 204 |
| FOXD4L5_1484 | 0.24957763 | 6.54E-49 | 1.15E-45 | 44.9379496 | TRUE | 205 |
| FOXD4L6_1513 | 0.24957763 | 6.54E-49 | 1.15E-45 | 44.9379496 | TRUE | 206 |
| FOXJ1_1600   | 0.24957763 | 6.54E-49 | 1.15E-45 | 44.9379496 | TRUE | 207 |
| FOXL2_1637   | 0.24957763 | 6.54E-49 | 1.15E-45 | 44.9379496 | TRUE | 208 |
| FOXD4L4_1666 | 0.24957763 | 6.54E-49 | 1.15E-45 | 44.9379496 | TRUE | 209 |
| FOXD4L2_1695 | 0.24957763 | 6.54E-49 | 1.15E-45 | 44.9379496 | TRUE | 210 |
| NEUROG2_116  | 0.24911335 | 9.92E-49 | 1.75E-45 | 44.7570197 | TRUE | 211 |
| SP3_352      | 0.24883124 | 1.28E-48 | 2.25E-45 | 44.6472649 | TRUE | 212 |
| OTX1_675     | 0.24709863 | 5.99E-48 | 1.06E-44 | 43.9762624 | TRUE | 213 |

|              |            |          |          |            |      |     |
|--------------|------------|----------|----------|------------|------|-----|
| MEIS1_744    | 0.24700209 | 6.52E-48 | 1.15E-44 | 43.9390293 | TRUE | 214 |
| CRX_633      | 0.24637678 | 1.14E-47 | 2.00E-44 | 43.6982571 | TRUE | 215 |
| ZNF333_312   | 0.24605185 | 1.51E-47 | 2.67E-44 | 43.5734127 | TRUE | 216 |
| SP2_329      | 0.24564718 | 2.16E-47 | 3.82E-44 | 43.4181898 | TRUE | 217 |
| POU6F2_911   | 0.24445689 | 6.17E-47 | 1.09E-43 | 42.9632757 | TRUE | 218 |
| FOXC2_562    | 0.24115192 | 1.10E-45 | 1.94E-42 | 41.7130869 | TRUE | 219 |
| ISX_812      | 0.23983534 | 3.41E-45 | 6.02E-42 | 41.2203345 | TRUE | 220 |
| POU2F1_918   | 0.23920254 | 5.87E-45 | 1.04E-41 | 40.984565  | TRUE | 221 |
| NOTO_852     | 0.23912371 | 6.28E-45 | 1.11E-41 | 40.9552427 | TRUE | 222 |
| KLF8_262     | 0.23890909 | 7.55E-45 | 1.33E-41 | 40.8754666 | TRUE | 223 |
| KLF2_1570    | 0.23890909 | 7.55E-45 | 1.33E-41 | 40.8754666 | TRUE | 224 |
| FOXJ2_517    | 0.23791816 | 1.76E-44 | 3.10E-41 | 40.5081582 | TRUE | 225 |
| FOXN3_1376   | 0.23791816 | 1.76E-44 | 3.10E-41 | 40.5081582 | TRUE | 226 |
| FOXD4_1401   | 0.23791816 | 1.76E-44 | 3.10E-41 | 40.5081582 | TRUE | 227 |
| FOXD4L1_1431 | 0.23791816 | 1.76E-44 | 3.10E-41 | 40.5081582 | TRUE | 228 |
| FOXD4L3_1460 | 0.23791816 | 1.76E-44 | 3.10E-41 | 40.5081582 | TRUE | 229 |
| FOXD4L5_1489 | 0.23791816 | 1.76E-44 | 3.10E-41 | 40.5081582 | TRUE | 230 |
| FOXD4L6_1518 | 0.23791816 | 1.76E-44 | 3.10E-41 | 40.5081582 | TRUE | 231 |
| FOXJ1_1605   | 0.23791816 | 1.76E-44 | 3.10E-41 | 40.5081582 | TRUE | 232 |
| FOXN2_1618   | 0.23791816 | 1.76E-44 | 3.10E-41 | 40.5081582 | TRUE | 233 |
| FOXL2_1642   | 0.23791816 | 1.76E-44 | 3.10E-41 | 40.5081582 | TRUE | 234 |
| FOXD4L4_1671 | 0.23791816 | 1.76E-44 | 3.10E-41 | 40.5081582 | TRUE | 235 |
| FOXD4L2_1700 | 0.23791816 | 1.76E-44 | 3.10E-41 | 40.5081582 | TRUE | 236 |
| MYB_995      | 0.23717863 | 3.30E-44 | 5.82E-41 | 40.2351408 | TRUE | 237 |
| HNF1A_723    | 0.23681224 | 4.50E-44 | 7.94E-41 | 40.1002295 | TRUE | 238 |
| SMAD2_1199   | 0.23530462 | 1.61E-43 | 2.83E-40 | 39.5475175 | TRUE | 239 |
| SMAD4_1191   | 0.23511336 | 1.89E-43 | 3.33E-40 | 39.4776772 | TRUE | 240 |

|              |            |          |          |            |      |     |
|--------------|------------|----------|----------|------------|------|-----|
| FOXO6_582    | 0.23430787 | 3.71E-43 | 6.54E-40 | 39.1842417 | TRUE | 241 |
| FOXB2_585    | 0.23352393 | 7.14E-43 | 1.26E-39 | 38.8997254 | TRUE | 242 |
| NFYC_1326    | 0.23287573 | 1.23E-42 | 2.16E-39 | 38.6652675 | TRUE | 243 |
| NFYA_404     | 0.23277146 | 1.34E-42 | 2.36E-39 | 38.6276191 | TRUE | 244 |
| FOXL1_556    | 0.23273259 | 1.38E-42 | 2.43E-39 | 38.6135899 | TRUE | 245 |
| FOXD4_1399   | 0.23273259 | 1.38E-42 | 2.43E-39 | 38.6135899 | TRUE | 246 |
| FOXD4L1_1429 | 0.23273259 | 1.38E-42 | 2.43E-39 | 38.6135899 | TRUE | 247 |
| FOXD4L3_1458 | 0.23273259 | 1.38E-42 | 2.43E-39 | 38.6135899 | TRUE | 248 |
| FOXD4L5_1487 | 0.23273259 | 1.38E-42 | 2.43E-39 | 38.6135899 | TRUE | 249 |
| FOXD4L6_1516 | 0.23273259 | 1.38E-42 | 2.43E-39 | 38.6135899 | TRUE | 250 |
| FOXJ1_1603   | 0.23273259 | 1.38E-42 | 2.43E-39 | 38.6135899 | TRUE | 251 |
| FOXL2_1640   | 0.23273259 | 1.38E-42 | 2.43E-39 | 38.6135899 | TRUE | 252 |
| FOXD4L4_1669 | 0.23273259 | 1.38E-42 | 2.43E-39 | 38.6135899 | TRUE | 253 |
| FOXD4L2_1698 | 0.23273259 | 1.38E-42 | 2.43E-39 | 38.6135899 | TRUE | 254 |
| SOX10_1214   | 0.23222816 | 2.10E-42 | 3.70E-39 | 38.4317558 | TRUE | 255 |
| SIX2_802     | 0.23205816 | 2.42E-42 | 4.26E-39 | 38.3705744 | TRUE | 256 |
| SOX10_1209   | 0.23198962 | 2.56E-42 | 4.51E-39 | 38.345923  | TRUE | 257 |
| SIX6_837     | 0.23119756 | 4.92E-42 | 8.68E-39 | 38.0616079 | TRUE | 258 |
| YBX2_1367    | 0.22936705 | 2.21E-41 | 3.90E-38 | 37.4086306 | TRUE | 259 |
| CSDA_1369    | 0.22936705 | 2.21E-41 | 3.90E-38 | 37.4086306 | TRUE | 260 |
| GSC_719      | 0.22803365 | 6.56E-41 | 1.16E-37 | 36.9365766 | TRUE | 261 |
| MEOX1_615    | 0.22789147 | 7.36E-41 | 1.30E-37 | 36.8864178 | TRUE | 262 |
| HOXA4_1728   | 0.22761567 | 9.21E-41 | 1.62E-37 | 36.789225  | TRUE | 263 |
| NKX31_788    | 0.22621604 | 2.85E-40 | 5.04E-37 | 36.2979667 | TRUE | 264 |
| MEIS2_720    | 0.22611648 | 3.09E-40 | 5.46E-37 | 36.2631506 | TRUE | 265 |
| CUX1_412     | 0.22604307 | 3.28E-40 | 5.79E-37 | 36.237489  | TRUE | 266 |
| E2F1_443     | 0.22340742 | 2.70E-39 | 4.76E-36 | 35.3221822 | TRUE | 267 |

|              |            |          |          |            |      |     |
|--------------|------------|----------|----------|------------|------|-----|
| FOXD4_1400   | 0.22253284 | 5.40E-39 | 9.53E-36 | 35.0210566 | TRUE | 268 |
| FOXD4L1_1430 | 0.22253284 | 5.40E-39 | 9.53E-36 | 35.0210566 | TRUE | 269 |
| FOXD4L3_1459 | 0.22253284 | 5.40E-39 | 9.53E-36 | 35.0210566 | TRUE | 270 |
| FOXD4L5_1488 | 0.22253284 | 5.40E-39 | 9.53E-36 | 35.0210566 | TRUE | 271 |
| FOXD4L6_1517 | 0.22253284 | 5.40E-39 | 9.53E-36 | 35.0210566 | TRUE | 272 |
| FOXJ1_1604   | 0.22253284 | 5.40E-39 | 9.53E-36 | 35.0210566 | TRUE | 273 |
| FOXL2_1641   | 0.22253284 | 5.40E-39 | 9.53E-36 | 35.0210566 | TRUE | 274 |
| FOXD4L4_1670 | 0.22253284 | 5.40E-39 | 9.53E-36 | 35.0210566 | TRUE | 275 |
| FOXD4L2_1699 | 0.22253284 | 5.40E-39 | 9.53E-36 | 35.0210566 | TRUE | 276 |
| FOXJ2_518    | 0.22250896 | 5.50E-39 | 9.71E-36 | 35.0128503 | TRUE | 277 |
| FOXN3_1373   | 0.22250896 | 5.50E-39 | 9.71E-36 | 35.0128503 | TRUE | 278 |
| FOXD4_1394   | 0.22250896 | 5.50E-39 | 9.71E-36 | 35.0128503 | TRUE | 279 |
| FOXD4L1_1424 | 0.22250896 | 5.50E-39 | 9.71E-36 | 35.0128503 | TRUE | 280 |
| FOXD4L3_1453 | 0.22250896 | 5.50E-39 | 9.71E-36 | 35.0128503 | TRUE | 281 |
| FOXD4L5_1482 | 0.22250896 | 5.50E-39 | 9.71E-36 | 35.0128503 | TRUE | 282 |
| FOXD4L6_1511 | 0.22250896 | 5.50E-39 | 9.71E-36 | 35.0128503 | TRUE | 283 |
| FOXJ1_1598   | 0.22250896 | 5.50E-39 | 9.71E-36 | 35.0128503 | TRUE | 284 |
| FOXN2_1615   | 0.22250896 | 5.50E-39 | 9.71E-36 | 35.0128503 | TRUE | 285 |
| FOXL2_1635   | 0.22250896 | 5.50E-39 | 9.71E-36 | 35.0128503 | TRUE | 286 |
| FOXD4L4_1664 | 0.22250896 | 5.50E-39 | 9.71E-36 | 35.0128503 | TRUE | 287 |
| FOXD4L2_1693 | 0.22250896 | 5.50E-39 | 9.71E-36 | 35.0128503 | TRUE | 288 |
| FOXO1_538    | 0.22231034 | 6.44E-39 | 1.14E-35 | 34.9446504 | TRUE | 289 |
| SOX15_1231   | 0.22194419 | 8.60E-39 | 1.52E-35 | 34.8191022 | TRUE | 290 |
| VSX2_683     | 0.22193329 | 8.67E-39 | 1.53E-35 | 34.8153669 | TRUE | 291 |
| FOXL1_559    | 0.22172618 | 1.02E-38 | 1.80E-35 | 34.7444565 | TRUE | 292 |
| ESRRG_1112   | 0.2213141  | 1.41E-38 | 2.49E-35 | 34.6035801 | TRUE | 293 |
| SOX8_1201    | 0.22098    | 1.84E-38 | 3.24E-35 | 34.4895709 | TRUE | 294 |

|              |            |          |          |            |      |     |
|--------------|------------|----------|----------|------------|------|-----|
| TFCP2_611    | 0.22082669 | 2.07E-38 | 3.65E-35 | 34.4373189 | TRUE | 295 |
| HOXD1_705    | 0.220587   | 2.50E-38 | 4.41E-35 | 34.3557051 | TRUE | 296 |
| ESRRA_1092   | 0.22001689 | 3.90E-38 | 6.89E-35 | 34.1619734 | TRUE | 297 |
| TFCP2L1_1711 | 0.21990056 | 4.28E-38 | 7.54E-35 | 34.1225091 | TRUE | 298 |
| MYBL2_989    | 0.21986731 | 4.39E-38 | 7.74E-35 | 34.1112328 | TRUE | 299 |
| SOX7_1247    | 0.21937138 | 6.46E-38 | 1.14E-34 | 33.9432763 | TRUE | 300 |
| FOXC1_515    | 0.21537141 | 1.41E-36 | 2.49E-33 | 32.6036836 | TRUE | 301 |
| FOXA2_529    | 0.21507118 | 1.78E-36 | 3.13E-33 | 32.5042184 | TRUE | 302 |
| TBP_1314     | 0.21455188 | 2.64E-36 | 4.65E-33 | 32.3325258 | TRUE | 303 |
| NFIX_1190    | 0.21400208 | 4.00E-36 | 7.06E-33 | 32.1512424 | TRUE | 304 |
| E2F5_454     | 0.21353772 | 5.69E-36 | 1.00E-32 | 31.9985224 | TRUE | 305 |
| SMAD1_1198   | 0.21321534 | 7.26E-36 | 1.28E-32 | 31.8927093 | TRUE | 306 |
| SMAD5_1752   | 0.21321534 | 7.26E-36 | 1.28E-32 | 31.8927093 | TRUE | 307 |
| SMAD9_1757   | 0.21321534 | 7.26E-36 | 1.28E-32 | 31.8927093 | TRUE | 308 |
| LHX4_692     | 0.21138636 | 2.87E-35 | 5.06E-32 | 31.2956599 | TRUE | 309 |
| FOXC1_514    | 0.2110422  | 3.71E-35 | 6.55E-32 | 31.1839359 | TRUE | 310 |
| PPARA_1108   | 0.21035982 | 6.17E-35 | 1.09E-31 | 30.9629933 | TRUE | 311 |
| TCF23_97     | 0.20996589 | 8.27E-35 | 1.46E-31 | 30.8358015 | TRUE | 312 |
| KLF9_282     | 0.20820653 | 3.04E-34 | 5.36E-31 | 30.2708641 | TRUE | 313 |
| FOXJ3_579    | 0.20809559 | 3.30E-34 | 5.82E-31 | 30.2354116 | TRUE | 314 |
| FOXN3_1374   | 0.20809559 | 3.30E-34 | 5.82E-31 | 30.2354116 | TRUE | 315 |
| FOXD4_1395   | 0.20809559 | 3.30E-34 | 5.82E-31 | 30.2354116 | TRUE | 316 |
| FOXD4L1_1425 | 0.20809559 | 3.30E-34 | 5.82E-31 | 30.2354116 | TRUE | 317 |
| FOXD4L3_1454 | 0.20809559 | 3.30E-34 | 5.82E-31 | 30.2354116 | TRUE | 318 |
| FOXD4L5_1483 | 0.20809559 | 3.30E-34 | 5.82E-31 | 30.2354116 | TRUE | 319 |
| FOXD4L6_1512 | 0.20809559 | 3.30E-34 | 5.82E-31 | 30.2354116 | TRUE | 320 |
| FOXJ1_1599   | 0.20809559 | 3.30E-34 | 5.82E-31 | 30.2354116 | TRUE | 321 |

|              |            |          |          |            |      |     |
|--------------|------------|----------|----------|------------|------|-----|
| FOXN2_1616   | 0.20809559 | 3.30E-34 | 5.82E-31 | 30.2354116 | TRUE | 322 |
| FOXL2_1636   | 0.20809559 | 3.30E-34 | 5.82E-31 | 30.2354116 | TRUE | 323 |
| FOXD4L4_1665 | 0.20809559 | 3.30E-34 | 5.82E-31 | 30.2354116 | TRUE | 324 |
| FOXD4L2_1694 | 0.20809559 | 3.30E-34 | 5.82E-31 | 30.2354116 | TRUE | 325 |
| FOXD4_1390   | 0.20770441 | 4.39E-34 | 7.75E-31 | 30.1105711 | TRUE | 326 |
| FOXD4L1_1420 | 0.20770441 | 4.39E-34 | 7.75E-31 | 30.1105711 | TRUE | 327 |
| FOXD4L3_1451 | 0.20770441 | 4.39E-34 | 7.75E-31 | 30.1105711 | TRUE | 328 |
| FOXD4L5_1480 | 0.20770441 | 4.39E-34 | 7.75E-31 | 30.1105711 | TRUE | 329 |
| FOXD4L6_1509 | 0.20770441 | 4.39E-34 | 7.75E-31 | 30.1105711 | TRUE | 330 |
| FOXJ1_1593   | 0.20770441 | 4.39E-34 | 7.75E-31 | 30.1105711 | TRUE | 331 |
| FOXL2_1631   | 0.20770441 | 4.39E-34 | 7.75E-31 | 30.1105711 | TRUE | 332 |
| FOXD4L4_1662 | 0.20770441 | 4.39E-34 | 7.75E-31 | 30.1105711 | TRUE | 333 |
| FOXD4L2_1691 | 0.20770441 | 4.39E-34 | 7.75E-31 | 30.1105711 | TRUE | 334 |
| ARID2_24     | 0.20651493 | 1.05E-33 | 1.85E-30 | 29.7325139 | TRUE | 335 |
| FOXO4_568    | 0.20628906 | 1.24E-33 | 2.18E-30 | 29.6609895 | TRUE | 336 |
| HOXA4_1733   | 0.20612057 | 1.40E-33 | 2.47E-30 | 29.6076881 | TRUE | 337 |
| HNF1B_663    | 0.20528848 | 2.56E-33 | 4.52E-30 | 29.3451517 | TRUE | 338 |
| SOX3_1236    | 0.20359369 | 8.70E-33 | 1.53E-29 | 28.8139471 | TRUE | 339 |
| SIX4_629     | 0.20253747 | 1.85E-32 | 3.27E-29 | 28.485278  | TRUE | 340 |
| CEBPZ_1332   | 0.20232395 | 2.16E-32 | 3.81E-29 | 28.4190598 | TRUE | 341 |
| THRA_1041    | 0.20164883 | 3.49E-32 | 6.16E-29 | 28.2101775 | TRUE | 342 |
| DPRX_850     | 0.20149108 | 3.91E-32 | 6.89E-29 | 28.1614766 | TRUE | 343 |
| MYF5_1553    | 0.20045135 | 8.17E-32 | 1.44E-28 | 27.8415137 | TRUE | 344 |
| EMX2_798     | 0.20041573 | 8.37E-32 | 1.48E-28 | 27.8305854 | TRUE | 345 |
| ZBTB47_278   | 0.20033309 | 8.88E-32 | 1.57E-28 | 27.8052336 | TRUE | 346 |
| ZNF652_392   | 0.20033309 | 8.88E-32 | 1.57E-28 | 27.8052336 | TRUE | 347 |
| NR5A1_1055   | 0.19949399 | 1.60E-31 | 2.83E-28 | 27.5484635 | TRUE | 348 |

|              |            |          |          |            |      |     |
|--------------|------------|----------|----------|------------|------|-----|
| PAX4_897     | 0.19906829 | 2.16E-31 | 3.81E-28 | 27.4186386 | TRUE | 349 |
| SOX11_1249   | 0.19902925 | 2.22E-31 | 3.92E-28 | 27.4067464 | TRUE | 350 |
| MYBL2_990    | 0.19881446 | 2.58E-31 | 4.56E-28 | 27.3413697 | TRUE | 351 |
| POU3F4_936   | 0.19861136 | 2.98E-31 | 5.25E-28 | 27.2796189 | TRUE | 352 |
| POU5F1_1530  | 0.19861136 | 2.98E-31 | 5.25E-28 | 27.2796189 | TRUE | 353 |
| POU5F1_1534  | 0.19861136 | 2.98E-31 | 5.25E-28 | 27.2796189 | TRUE | 354 |
| POU5F1_1538  | 0.19861136 | 2.98E-31 | 5.25E-28 | 27.2796189 | TRUE | 355 |
| POU5F1_1542  | 0.19861136 | 2.98E-31 | 5.25E-28 | 27.2796189 | TRUE | 356 |
| POU5F1_1546  | 0.19861136 | 2.98E-31 | 5.25E-28 | 27.2796189 | TRUE | 357 |
| POU5F1_1741  | 0.19861136 | 2.98E-31 | 5.25E-28 | 27.2796189 | TRUE | 358 |
| MYBL2_992    | 0.19827695 | 3.76E-31 | 6.64E-28 | 27.1780909 | TRUE | 359 |
| EMX1_725     | 0.19790527 | 4.88E-31 | 8.60E-28 | 27.0654608 | TRUE | 360 |
| ESX1_700     | 0.19706065 | 8.77E-31 | 1.55E-27 | 26.8103563 | TRUE | 361 |
| ESRRG_1110   | 0.19655816 | 1.24E-30 | 2.19E-27 | 26.6591394 | TRUE | 362 |
| HESX1_772    | 0.19533319 | 2.89E-30 | 5.10E-27 | 26.2922249 | TRUE | 363 |
| SOX21_1220   | 0.19404265 | 7.00E-30 | 1.24E-26 | 25.9083107 | TRUE | 364 |
| FOXD4_1386   | 0.19387501 | 7.85E-30 | 1.38E-26 | 25.8586382 | TRUE | 365 |
| FOXD4L1_1416 | 0.19387501 | 7.85E-30 | 1.38E-26 | 25.8586382 | TRUE | 366 |
| FOXD4L3_1445 | 0.19387501 | 7.85E-30 | 1.38E-26 | 25.8586382 | TRUE | 367 |
| FOXD4L5_1474 | 0.19387501 | 7.85E-30 | 1.38E-26 | 25.8586382 | TRUE | 368 |
| FOXD4L6_1503 | 0.19387501 | 7.85E-30 | 1.38E-26 | 25.8586382 | TRUE | 369 |
| FOXJ1_1590   | 0.19387501 | 7.85E-30 | 1.38E-26 | 25.8586382 | TRUE | 370 |
| FOXD4L4_1656 | 0.19387501 | 7.85E-30 | 1.38E-26 | 25.8586382 | TRUE | 371 |
| FOXD4L2_1685 | 0.19387501 | 7.85E-30 | 1.38E-26 | 25.8586382 | TRUE | 372 |
| SOX2_1254    | 0.19360263 | 9.45E-30 | 1.67E-26 | 25.7780307 | TRUE | 373 |
| TGIF1_818    | 0.19225316 | 2.36E-29 | 4.16E-26 | 25.3804407 | TRUE | 374 |
| FOXO1_540    | 0.19216602 | 2.50E-29 | 4.42E-26 | 25.3548664 | TRUE | 375 |



|              |            |          |          |            |      |     |
|--------------|------------|----------|----------|------------|------|-----|
| FOXJ2_520    | 0.19136358 | 4.30E-29 | 7.59E-26 | 25.1199599 | TRUE | 376 |
| NKX24_702    | 0.19121288 | 4.76E-29 | 8.40E-26 | 25.0759596 | TRUE | 377 |
| RFX4_1165    | 0.19110769 | 5.11E-29 | 9.01E-26 | 25.045271  | TRUE | 378 |
| GSC2_621     | 0.1902202  | 9.26E-29 | 1.63E-25 | 24.787045  | TRUE | 379 |
| FOXL2_1626   | 0.18924074 | 1.78E-28 | 3.14E-25 | 24.503538  | TRUE | 380 |
| FOXC2_560    | 0.18893128 | 2.18E-28 | 3.85E-25 | 24.414287  | TRUE | 381 |
| SRY_1258     | 0.18890763 | 2.22E-28 | 3.91E-25 | 24.4074739 | TRUE | 382 |
| HNF1A_724    | 0.18866281 | 2.61E-28 | 4.60E-25 | 24.3369836 | TRUE | 383 |
| MEOX2_648    | 0.18779876 | 4.62E-28 | 8.15E-25 | 24.0889747 | TRUE | 384 |
| E2F2_437     | 0.18738005 | 6.09E-28 | 1.07E-24 | 23.9692234 | TRUE | 385 |
| FOXC1_511    | 0.18734372 | 6.23E-28 | 1.10E-24 | 23.9588474 | TRUE | 386 |
| FOXL2_1628   | 0.18734372 | 6.23E-28 | 1.10E-24 | 23.9588474 | TRUE | 387 |
| NKX23_684    | 0.18726288 | 6.57E-28 | 1.16E-24 | 23.9357632 | TRUE | 388 |
| SOX9_1225    | 0.18695276 | 8.06E-28 | 1.42E-24 | 23.8473118 | TRUE | 389 |
| FOXC2_561    | 0.18691308 | 8.27E-28 | 1.46E-24 | 23.8360058 | TRUE | 390 |
| FOXD4_1385   | 0.18691308 | 8.27E-28 | 1.46E-24 | 23.8360058 | TRUE | 391 |
| FOXD4L1_1415 | 0.18691308 | 8.27E-28 | 1.46E-24 | 23.8360058 | TRUE | 392 |
| FOXD4L3_1444 | 0.18691308 | 8.27E-28 | 1.46E-24 | 23.8360058 | TRUE | 393 |
| FOXD4L5_1473 | 0.18691308 | 8.27E-28 | 1.46E-24 | 23.8360058 | TRUE | 394 |
| FOXD4L6_1502 | 0.18691308 | 8.27E-28 | 1.46E-24 | 23.8360058 | TRUE | 395 |
| FOXJ1_1589   | 0.18691308 | 8.27E-28 | 1.46E-24 | 23.8360058 | TRUE | 396 |
| FOXD4L4_1655 | 0.18691308 | 8.27E-28 | 1.46E-24 | 23.8360058 | TRUE | 397 |
| FOXD4L2_1684 | 0.18691308 | 8.27E-28 | 1.46E-24 | 23.8360058 | TRUE | 398 |
| SOX18_1262   | 0.18626494 | 1.26E-27 | 2.23E-24 | 23.6516823 | TRUE | 399 |
| DLX5_636     | 0.18608164 | 1.43E-27 | 2.51E-24 | 23.5996779 | TRUE | 400 |
| ZNF32_336    | 0.18603356 | 1.47E-27 | 2.59E-24 | 23.5860452 | TRUE | 401 |
| POU5F1B_943  | 0.18580241 | 1.71E-27 | 3.02E-24 | 23.5205582 | TRUE | 402 |

|              |            |          |          |            |      |     |
|--------------|------------|----------|----------|------------|------|-----|
| POU5F1_1532  | 0.18580241 | 1.71E-27 | 3.02E-24 | 23.5205582 | TRUE | 403 |
| POU5F1_1536  | 0.18580241 | 1.71E-27 | 3.02E-24 | 23.5205582 | TRUE | 404 |
| POU5F1_1540  | 0.18580241 | 1.71E-27 | 3.02E-24 | 23.5205582 | TRUE | 405 |
| POU5F1_1544  | 0.18580241 | 1.71E-27 | 3.02E-24 | 23.5205582 | TRUE | 406 |
| POU5F1_1548  | 0.18580241 | 1.71E-27 | 3.02E-24 | 23.5205582 | TRUE | 407 |
| POU5F1_1743  | 0.18580241 | 1.71E-27 | 3.02E-24 | 23.5205582 | TRUE | 408 |
| SOX5_1235    | 0.18577197 | 1.74E-27 | 3.08E-24 | 23.5119418 | TRUE | 409 |
| SOX6_1759    | 0.18577197 | 1.74E-27 | 3.08E-24 | 23.5119418 | TRUE | 410 |
| RFX1_1167    | 0.18491899 | 3.04E-27 | 5.36E-24 | 23.2710685 | TRUE | 411 |
| E2F1_446     | 0.18325445 | 8.89E-27 | 1.57E-23 | 22.8043867 | TRUE | 412 |
| EGR4_299     | 0.18322949 | 9.04E-27 | 1.59E-23 | 22.7974224 | TRUE | 413 |
| ESRRA_1090   | 0.18298835 | 1.06E-26 | 1.86E-23 | 22.7301932 | TRUE | 414 |
| NR2F2_1100   | 0.18267618 | 1.29E-26 | 2.27E-23 | 22.6433002 | TRUE | 415 |
| POU3F2_928   | 0.18258503 | 1.37E-26 | 2.41E-23 | 22.6179571 | TRUE | 416 |
| E2F2_441     | 0.18184939 | 2.19E-26 | 3.86E-23 | 22.413913  | TRUE | 417 |
| E2F1_445     | 0.18064478 | 4.70E-26 | 8.29E-23 | 22.0816561 | TRUE | 418 |
| SRY_1257     | 0.18012773 | 6.51E-26 | 1.15E-22 | 21.9397574 | TRUE | 419 |
| HMBOX1_746   | 0.17964547 | 8.82E-26 | 1.56E-22 | 21.807788  | TRUE | 420 |
| FOXL2_1627   | 0.17954777 | 9.38E-26 | 1.66E-22 | 21.7810971 | TRUE | 421 |
| VSX1_630     | 0.17938111 | 1.04E-25 | 1.84E-22 | 21.7356031 | TRUE | 422 |
| HESX1_771    | 0.17916709 | 1.19E-25 | 2.10E-22 | 21.6772476 | TRUE | 423 |
| SPZ1_1338    | 0.17814884 | 2.25E-25 | 3.98E-22 | 21.4006034 | TRUE | 424 |
| HOXA9_627    | 0.17755434 | 3.26E-25 | 5.76E-22 | 21.2398502 | TRUE | 425 |
| HOXB2_806    | 0.17735161 | 3.70E-25 | 6.53E-22 | 21.1851588 | TRUE | 426 |
| VENTX_749    | 0.17664226 | 5.74E-25 | 1.01E-21 | 20.994316  | TRUE | 427 |
| TEF_195      | 0.176526   | 6.17E-25 | 1.09E-21 | 20.9631115 | TRUE | 428 |
| TFCP2L1_1710 | 0.17364358 | 3.61E-24 | 6.36E-21 | 20.196378  | TRUE | 429 |

|              |            |          |          |            |      |     |
|--------------|------------|----------|----------|------------|------|-----|
| MYBL1_1001   | 0.1734371  | 4.09E-24 | 7.21E-21 | 20.1419609 | TRUE | 430 |
| RFX6_1172    | 0.17329639 | 4.45E-24 | 7.85E-21 | 20.1049153 | TRUE | 431 |
| CUX2_409     | 0.1722116  | 8.57E-24 | 1.51E-20 | 19.8203647 | TRUE | 432 |
| PDX1_734     | 0.17076775 | 2.04E-23 | 3.59E-20 | 19.4445164 | TRUE | 433 |
| TLX1_659     | 0.16976169 | 3.71E-23 | 6.54E-20 | 19.1845772 | TRUE | 434 |
| TLX3_774     | 0.16976169 | 3.71E-23 | 6.54E-20 | 19.1845772 | TRUE | 435 |
| CDC5L_988    | 0.16974327 | 3.75E-23 | 6.61E-20 | 19.1798332 | TRUE | 436 |
| NR4A1_1040   | 0.16914275 | 5.35E-23 | 9.43E-20 | 19.0254531 | TRUE | 437 |
| POU5F1_1529  | 0.16912458 | 5.40E-23 | 9.53E-20 | 19.0207916 | TRUE | 438 |
| POU5F1_1533  | 0.16912458 | 5.40E-23 | 9.53E-20 | 19.0207916 | TRUE | 439 |
| POU5F1_1537  | 0.16912458 | 5.40E-23 | 9.53E-20 | 19.0207916 | TRUE | 440 |
| POU5F1_1541  | 0.16912458 | 5.40E-23 | 9.53E-20 | 19.0207916 | TRUE | 441 |
| POU5F1_1545  | 0.16912458 | 5.40E-23 | 9.53E-20 | 19.0207916 | TRUE | 442 |
| POU5F1_1740  | 0.16912458 | 5.40E-23 | 9.53E-20 | 19.0207916 | TRUE | 443 |
| RFX2_1163    | 0.16873341 | 6.81E-23 | 1.20E-19 | 18.9205468 | TRUE | 444 |
| SRF_982      | 0.16869385 | 6.97E-23 | 1.23E-19 | 18.9104233 | TRUE | 445 |
| ESRRB_1038   | 0.16850493 | 7.79E-23 | 1.37E-19 | 18.8621066 | TRUE | 446 |
| MEOX2_650    | 0.16845361 | 8.03E-23 | 1.42E-19 | 18.8489904 | TRUE | 447 |
| NEUROD4_1354 | 0.16834474 | 8.56E-23 | 1.51E-19 | 18.8211823 | TRUE | 448 |
| NEUROD6_1358 | 0.16834474 | 8.56E-23 | 1.51E-19 | 18.8211823 | TRUE | 449 |
| ATOH1_1561   | 0.16834474 | 8.56E-23 | 1.51E-19 | 18.8211823 | TRUE | 450 |
| TEAD3_1317   | 0.1672318  | 1.64E-22 | 2.90E-19 | 18.5379712 | TRUE | 451 |
| ZKSCAN1_270  | 0.16577981 | 3.82E-22 | 6.74E-19 | 18.1714106 | TRUE | 452 |
| ALX3_754     | 0.16500037 | 5.99E-22 | 1.06E-18 | 17.9760053 | TRUE | 453 |
| NFYA_403     | 0.16467234 | 7.24E-22 | 1.28E-18 | 17.8940538 | TRUE | 454 |
| TP73_1123    | 0.16411293 | 9.97E-22 | 1.76E-18 | 17.7546839 | TRUE | 455 |
| HOXA7_693    | 0.16366929 | 1.29E-21 | 2.27E-18 | 17.6445058 | TRUE | 456 |

|              |            |          |          |            |      |     |
|--------------|------------|----------|----------|------------|------|-----|
| HOXA4_1737   | 0.16366929 | 1.29E-21 | 2.27E-18 | 17.6445058 | TRUE | 457 |
| PDX1_735     | 0.16334044 | 1.55E-21 | 2.74E-18 | 17.5630347 | TRUE | 458 |
| HOXA4_1736   | 0.16334044 | 1.55E-21 | 2.74E-18 | 17.5630347 | TRUE | 459 |
| PAX5_1133    | 0.16277348 | 2.14E-21 | 3.78E-18 | 17.4229701 | TRUE | 460 |
| NEUROD4_135  | 0.1616835  | 3.97E-21 | 7.00E-18 | 17.1551121 | TRUE | 461 |
| NEUROD6_135  | 0.1616835  | 3.97E-21 | 7.00E-18 | 17.1551121 | TRUE | 462 |
| NKX21_728    | 0.16151084 | 4.37E-21 | 7.71E-18 | 17.1128506 | TRUE | 463 |
| E2F3_449     | 0.16078447 | 6.58E-21 | 1.16E-17 | 16.9355754 | TRUE | 464 |
| POU2F3_913   | 0.16049941 | 7.71E-21 | 1.36E-17 | 16.8662299 | TRUE | 465 |
| E2F7_456     | 0.16047177 | 7.83E-21 | 1.38E-17 | 16.8595124 | TRUE | 466 |
| VENTX_748    | 0.16027461 | 8.75E-21 | 1.54E-17 | 16.8116341 | TRUE | 467 |
| E2F3_452     | 0.15988693 | 1.09E-20 | 1.92E-17 | 16.7176622 | TRUE | 468 |
| HOXA1_637    | 0.15932145 | 1.49E-20 | 2.62E-17 | 16.5810165 | TRUE | 469 |
| RARG_1085    | 0.15923828 | 1.56E-20 | 2.75E-17 | 16.5609591 | TRUE | 470 |
| FOXC1_513    | 0.15918367 | 1.61E-20 | 2.83E-17 | 16.5477967 | TRUE | 471 |
| FOXD4_1391   | 0.15918367 | 1.61E-20 | 2.83E-17 | 16.5477967 | TRUE | 472 |
| FOXD4L1_1421 | 0.15918367 | 1.61E-20 | 2.83E-17 | 16.5477967 | TRUE | 473 |
| FOXD4L3_1449 | 0.15918367 | 1.61E-20 | 2.83E-17 | 16.5477967 | TRUE | 474 |
| FOXD4L5_1478 | 0.15918367 | 1.61E-20 | 2.83E-17 | 16.5477967 | TRUE | 475 |
| FOXD4L6_1507 | 0.15918367 | 1.61E-20 | 2.83E-17 | 16.5477967 | TRUE | 476 |
| FOXJ1_1595   | 0.15918367 | 1.61E-20 | 2.83E-17 | 16.5477967 | TRUE | 477 |
| FOXL2_1629   | 0.15918367 | 1.61E-20 | 2.83E-17 | 16.5477967 | TRUE | 478 |
| FOXD4L4_1660 | 0.15918367 | 1.61E-20 | 2.83E-17 | 16.5477967 | TRUE | 479 |
| FOXD4L2_1689 | 0.15918367 | 1.61E-20 | 2.83E-17 | 16.5477967 | TRUE | 480 |
| TEAD4_1321   | 0.15908918 | 1.69E-20 | 2.99E-17 | 16.5250336 | TRUE | 481 |
| NR5A2_1036   | 0.15782128 | 3.41E-20 | 6.01E-17 | 16.2209172 | TRUE | 482 |
| ESR1_1016    | 0.15771244 | 3.62E-20 | 6.38E-17 | 16.1949284 | TRUE | 483 |

|            |            |          |          |            |      |     |
|------------|------------|----------|----------|------------|------|-----|
| DRGX_787   | 0.15705179 | 5.20E-20 | 9.17E-17 | 16.0375704 | TRUE | 484 |
| NR1H4_1005 | 0.15678303 | 6.02E-20 | 1.06E-16 | 15.9737491 | TRUE | 485 |
| SREBF2_134 | 0.15570997 | 1.08E-19 | 1.91E-16 | 15.7200565 | TRUE | 486 |
| FOXN3_1377 | 0.1552895  | 1.36E-19 | 2.39E-16 | 15.6211356 | TRUE | 487 |
| FOXN2_1619 | 0.1552895  | 1.36E-19 | 2.39E-16 | 15.6211356 | TRUE | 488 |
| E2F4_458   | 0.15520413 | 1.42E-19 | 2.51E-16 | 15.6010856 | TRUE | 489 |
| E2F1_442   | 0.15488123 | 1.69E-19 | 2.98E-16 | 15.5253486 | TRUE | 490 |
| ALX1_827   | 0.15427837 | 2.34E-19 | 4.13E-16 | 15.3843811 | TRUE | 491 |
| CEBPA_225  | 0.15422584 | 2.41E-19 | 4.24E-16 | 15.3721241 | TRUE | 492 |
| LHX9_742   | 0.15254327 | 5.91E-19 | 1.04E-15 | 14.9818024 | TRUE | 493 |
| DLX2_677   | 0.1520357  | 7.74E-19 | 1.36E-15 | 14.8649156 | TRUE | 494 |
| TGIF1_819  | 0.15125447 | 1.17E-18 | 2.06E-15 | 14.6857894 | TRUE | 495 |
| ESR2_1057  | 0.14955804 | 2.84E-18 | 5.01E-15 | 14.3000668 | TRUE | 496 |
| LBX2_823   | 0.14935737 | 3.15E-18 | 5.56E-15 | 14.2547349 | TRUE | 497 |
| POU1F1_907 | 0.14914937 | 3.51E-18 | 6.20E-15 | 14.2078115 | TRUE | 498 |
| ZSCAN4_373 | 0.14671187 | 1.23E-17 | 2.17E-14 | 13.662894  | TRUE | 499 |
| LBX1_733   | 0.14622697 | 1.58E-17 | 2.78E-14 | 13.5555823 | TRUE | 500 |
| CGBP_422   | 0.14570785 | 2.05E-17 | 3.62E-14 | 13.441098  | TRUE | 501 |
| EGR3_368   | 0.1436453  | 5.80E-17 | 1.02E-13 | 12.9903248 | TRUE | 502 |
| ZBTB49_334 | 0.14329487 | 6.90E-17 | 1.22E-13 | 12.9143852 | TRUE | 503 |
| ALX3_753   | 0.14325154 | 7.05E-17 | 1.24E-13 | 12.9050097 | TRUE | 504 |
| ESRRG_1111 | 0.14292101 | 8.32E-17 | 1.47E-13 | 12.8335781 | TRUE | 505 |
| TFAP2C_8   | 0.14227247 | 1.15E-16 | 2.02E-13 | 12.6939073 | TRUE | 506 |
| ALX1_826   | 0.14223281 | 1.17E-16 | 2.06E-13 | 12.6853862 | TRUE | 507 |
| ZFP42_1572 | 0.1419364  | 1.35E-16 | 2.39E-13 | 12.6217821 | TRUE | 508 |
| ALX4_620   | 0.14132742 | 1.83E-16 | 3.22E-13 | 12.4915304 | TRUE | 509 |
| PRRX1_680  | 0.14053969 | 2.69E-16 | 4.74E-13 | 12.3238879 | TRUE | 510 |

|              |            |          |          |            |      |     |
|--------------|------------|----------|----------|------------|------|-----|
| HNF4G_1082   | 0.14029006 | 3.04E-16 | 5.36E-13 | 12.2709613 | TRUE | 511 |
| CUX1_415     | 0.13966199 | 4.12E-16 | 7.27E-13 | 12.1382149 | TRUE | 512 |
| MSX2_691     | 0.1396167  | 4.22E-16 | 7.44E-13 | 12.1286666 | TRUE | 513 |
| ZNF589_320   | 0.13949787 | 4.47E-16 | 7.88E-13 | 12.103628  | TRUE | 514 |
| FOXN3_1372   | 0.13934235 | 4.82E-16 | 8.49E-13 | 12.0708897 | TRUE | 515 |
| FOXD4_1388   | 0.13934235 | 4.82E-16 | 8.49E-13 | 12.0708897 | TRUE | 516 |
| FOXD4L1_1417 | 0.13934235 | 4.82E-16 | 8.49E-13 | 12.0708897 | TRUE | 517 |
| FOXD4L3_1447 | 0.13934235 | 4.82E-16 | 8.49E-13 | 12.0708897 | TRUE | 518 |
| FOXD4L5_1476 | 0.13934235 | 4.82E-16 | 8.49E-13 | 12.0708897 | TRUE | 519 |
| FOXD4L6_1505 | 0.13934235 | 4.82E-16 | 8.49E-13 | 12.0708897 | TRUE | 520 |
| FOXJ1_1591   | 0.13934235 | 4.82E-16 | 8.49E-13 | 12.0708897 | TRUE | 521 |
| FOXN2_1614   | 0.13934235 | 4.82E-16 | 8.49E-13 | 12.0708897 | TRUE | 522 |
| FOXL2_1625   | 0.13934235 | 4.82E-16 | 8.49E-13 | 12.0708897 | TRUE | 523 |
| FOXD4L4_1658 | 0.13934235 | 4.82E-16 | 8.49E-13 | 12.0708897 | TRUE | 524 |
| FOXD4L2_1687 | 0.13934235 | 4.82E-16 | 8.49E-13 | 12.0708897 | TRUE | 525 |
| E2F3_450     | 0.13859038 | 6.92E-16 | 1.22E-12 | 11.9131174 | TRUE | 526 |
| ARID5B_20    | 0.13857627 | 6.97E-16 | 1.23E-12 | 11.9101646 | TRUE | 527 |
| POU2F1_916   | 0.13731319 | 1.28E-15 | 2.25E-12 | 11.6471236 | TRUE | 528 |
| TFAP4_45     | 0.13619669 | 2.17E-15 | 3.83E-12 | 11.4166295 | TRUE | 529 |
| FOXG1_554    | 0.1358716  | 2.53E-15 | 4.47E-12 | 11.3498751 | TRUE | 530 |
| FOXD4_1397   | 0.1358716  | 2.53E-15 | 4.47E-12 | 11.3498751 | TRUE | 531 |
| FOXD4L1_1427 | 0.1358716  | 2.53E-15 | 4.47E-12 | 11.3498751 | TRUE | 532 |
| FOXD4L3_1456 | 0.1358716  | 2.53E-15 | 4.47E-12 | 11.3498751 | TRUE | 533 |
| FOXD4L5_1485 | 0.1358716  | 2.53E-15 | 4.47E-12 | 11.3498751 | TRUE | 534 |
| FOXD4L6_1514 | 0.1358716  | 2.53E-15 | 4.47E-12 | 11.3498751 | TRUE | 535 |
| FOXJ1_1601   | 0.1358716  | 2.53E-15 | 4.47E-12 | 11.3498751 | TRUE | 536 |
| FOXL2_1638   | 0.1358716  | 2.53E-15 | 4.47E-12 | 11.3498751 | TRUE | 537 |

|              |            |          |          |            |      |     |
|--------------|------------|----------|----------|------------|------|-----|
| FOXD4L4_1667 | 0.1358716  | 2.53E-15 | 4.47E-12 | 11.3498751 | TRUE | 538 |
| FOXD4L2_1696 | 0.1358716  | 2.53E-15 | 4.47E-12 | 11.3498751 | TRUE | 539 |
| LBX2_824     | 0.13582714 | 2.59E-15 | 4.56E-12 | 11.3407571 | TRUE | 540 |
| TERF2_996    | 0.13541695 | 3.14E-15 | 5.54E-12 | 11.2567842 | TRUE | 541 |
| SIX3_732     | 0.13512384 | 3.60E-15 | 6.35E-12 | 11.1969357 | TRUE | 542 |
| POU2F1_922   | 0.1344425  | 4.96E-15 | 8.74E-12 | 11.0583213 | TRUE | 543 |
| ARX_613      | 0.13414347 | 5.70E-15 | 1.01E-11 | 10.9977088 | TRUE | 544 |
| NKX28_727    | 0.13232178 | 1.32E-14 | 2.34E-11 | 10.6313877 | TRUE | 545 |
| LHX2_653     | 0.13169709 | 1.76E-14 | 3.11E-11 | 10.5069272 | TRUE | 546 |
| MYF6_55      | 0.13139813 | 2.02E-14 | 3.57E-11 | 10.4475745 | TRUE | 547 |
| MYF5_1552    | 0.13139813 | 2.02E-14 | 3.57E-11 | 10.4475745 | TRUE | 548 |
| LHX6_655     | 0.1310684  | 2.35E-14 | 4.15E-11 | 10.3822667 | TRUE | 549 |
| FOXC1_512    | 0.13045125 | 3.11E-14 | 5.49E-11 | 10.2604773 | TRUE | 550 |
| FOXD4_1398   | 0.13045125 | 3.11E-14 | 5.49E-11 | 10.2604773 | TRUE | 551 |
| FOXD4L1_1428 | 0.13045125 | 3.11E-14 | 5.49E-11 | 10.2604773 | TRUE | 552 |
| FOXD4L3_1457 | 0.13045125 | 3.11E-14 | 5.49E-11 | 10.2604773 | TRUE | 553 |
| FOXD4L5_1486 | 0.13045125 | 3.11E-14 | 5.49E-11 | 10.2604773 | TRUE | 554 |
| FOXD4L6_1515 | 0.13045125 | 3.11E-14 | 5.49E-11 | 10.2604773 | TRUE | 555 |
| FOXJ1_1602   | 0.13045125 | 3.11E-14 | 5.49E-11 | 10.2604773 | TRUE | 556 |
| FOXL2_1639   | 0.13045125 | 3.11E-14 | 5.49E-11 | 10.2604773 | TRUE | 557 |
| FOXD4L4_1668 | 0.13045125 | 3.11E-14 | 5.49E-11 | 10.2604773 | TRUE | 558 |
| FOXD4L2_1697 | 0.13045125 | 3.11E-14 | 5.49E-11 | 10.2604773 | TRUE | 559 |
| GSX1_794     | 0.12963009 | 4.51E-14 | 7.96E-11 | 10.0993206 | TRUE | 560 |
| SNAI3_381    | 0.12912332 | 5.66E-14 | 9.99E-11 | 10.0003735 | TRUE | 561 |
| PPARG_1054   | 0.12879585 | 6.56E-14 | 1.16E-10 | 9.93664127 | TRUE | 562 |
| YY1_258      | 0.12863596 | 7.05E-14 | 1.24E-10 | 9.90558228 | TRUE | 563 |
| FOXA2_530    | 0.12861416 | 7.11E-14 | 1.26E-10 | 9.90135081 | TRUE | 564 |

|              |            |          |          |            |      |     |
|--------------|------------|----------|----------|------------|------|-----|
| PROX1_1138   | 0.12860189 | 7.15E-14 | 1.26E-10 | 9.8989686  | TRUE | 565 |
| SOX8_1203    | 0.12856082 | 7.29E-14 | 1.29E-10 | 9.89099933 | TRUE | 566 |
| TCF21_64     | 0.12854324 | 7.34E-14 | 1.30E-10 | 9.88758967 | TRUE | 567 |
| TCF24_127    | 0.12854324 | 7.34E-14 | 1.30E-10 | 9.88758967 | TRUE | 568 |
| HLX_730      | 0.12837559 | 7.91E-14 | 1.40E-10 | 9.85508774 | TRUE | 569 |
| HOXC5_805    | 0.12837559 | 7.91E-14 | 1.40E-10 | 9.85508774 | TRUE | 570 |
| HESX1_770    | 0.12765332 | 1.09E-13 | 1.93E-10 | 9.71555    | TRUE | 571 |
| BPTF_1340    | 0.12747593 | 1.18E-13 | 2.08E-10 | 9.6813981  | TRUE | 572 |
| CGBP_423     | 0.12704098 | 1.43E-13 | 2.52E-10 | 9.59786586 | TRUE | 573 |
| CXXC1_428    | 0.12704098 | 1.43E-13 | 2.52E-10 | 9.59786586 | TRUE | 574 |
| CDX2_784     | 0.12560019 | 2.69E-13 | 4.75E-10 | 9.32319364 | TRUE | 575 |
| SMAD9_1753   | 0.12543233 | 2.90E-13 | 5.11E-10 | 9.29139534 | TRUE | 576 |
| FOXB1_552    | 0.12450857 | 4.33E-13 | 7.64E-10 | 9.11716815 | TRUE | 577 |
| POU2F2_905   | 0.12409511 | 5.17E-13 | 9.13E-10 | 9.03960138 | TRUE | 578 |
| FOXI1_548    | 0.12335258 | 7.12E-13 | 1.26E-09 | 8.90094584 | TRUE | 579 |
| FOXD4_1407   | 0.12335258 | 7.12E-13 | 1.26E-09 | 8.90094584 | TRUE | 580 |
| FOXD4L1_1437 | 0.12335258 | 7.12E-13 | 1.26E-09 | 8.90094584 | TRUE | 581 |
| FOXD4L3_1466 | 0.12335258 | 7.12E-13 | 1.26E-09 | 8.90094584 | TRUE | 582 |
| FOXD4L5_1495 | 0.12335258 | 7.12E-13 | 1.26E-09 | 8.90094584 | TRUE | 583 |
| FOXD4L6_1524 | 0.12335258 | 7.12E-13 | 1.26E-09 | 8.90094584 | TRUE | 584 |
| FOXJ1_1610   | 0.12335258 | 7.12E-13 | 1.26E-09 | 8.90094584 | TRUE | 585 |
| FOXL2_1648   | 0.12335258 | 7.12E-13 | 1.26E-09 | 8.90094584 | TRUE | 586 |
| FOXD4L4_1677 | 0.12335258 | 7.12E-13 | 1.26E-09 | 8.90094584 | TRUE | 587 |
| FOXD4L2_1706 | 0.12335258 | 7.12E-13 | 1.26E-09 | 8.90094584 | TRUE | 588 |
| SOX4_1218    | 0.1233239  | 7.21E-13 | 1.27E-09 | 8.89560773 | TRUE | 589 |
| ZNF35_338    | 0.12314899 | 7.77E-13 | 1.37E-09 | 8.86307394 | TRUE | 590 |
| REST_247     | 0.12283831 | 8.87E-13 | 1.57E-09 | 8.80540058 | TRUE | 591 |



|              |            |          |          |            |      |     |
|--------------|------------|----------|----------|------------|------|-----|
| FOXG1_555    | 0.12260659 | 9.80E-13 | 1.73E-09 | 8.76247901 | TRUE | 592 |
| MSX1_767     | 0.12246596 | 1.04E-12 | 1.83E-09 | 8.73646895 | TRUE | 593 |
| CTCF_265     | 0.12219952 | 1.16E-12 | 2.05E-09 | 8.68727208 | TRUE | 594 |
| EN2_775      | 0.12208649 | 1.22E-12 | 2.16E-09 | 8.66643394 | TRUE | 595 |
| GRHL1_606    | 0.12171129 | 1.43E-12 | 2.53E-09 | 8.59740063 | TRUE | 596 |
| SMAD5_1750   | 0.12161025 | 1.50E-12 | 2.64E-09 | 8.57884503 | TRUE | 597 |
| SMAD9_1754   | 0.12161025 | 1.50E-12 | 2.64E-09 | 8.57884503 | TRUE | 598 |
| RXRA_1105    | 0.12038355 | 2.50E-12 | 4.42E-09 | 8.35479851 | TRUE | 599 |
| POU5F1_941   | 0.12032447 | 2.57E-12 | 4.53E-09 | 8.34406408 | TRUE | 600 |
| ISL1_617     | 0.11973794 | 3.28E-12 | 5.78E-09 | 8.23778876 | TRUE | 601 |
| DMRT1_431    | 0.11954863 | 3.55E-12 | 6.26E-09 | 8.20359661 | TRUE | 602 |
| RUNX3_1174   | 0.11921633 | 4.07E-12 | 7.18E-09 | 8.14370689 | TRUE | 603 |
| BARHL2_738   | 0.11901279 | 4.43E-12 | 7.81E-09 | 8.10710527 | TRUE | 604 |
| HAND1_58     | 0.11864951 | 5.15E-12 | 9.08E-09 | 8.04193305 | TRUE | 605 |
| HAND2_99     | 0.11864951 | 5.15E-12 | 9.08E-09 | 8.04193305 | TRUE | 606 |
| NR2F1_1095   | 0.11828498 | 5.98E-12 | 1.06E-08 | 7.97673512 | TRUE | 607 |
| VAX2_678     | 0.11802955 | 6.64E-12 | 1.17E-08 | 7.93116862 | TRUE | 608 |
| VAX1_747     | 0.11802955 | 6.64E-12 | 1.17E-08 | 7.93116862 | TRUE | 609 |
| FOXI1_545    | 0.11797667 | 6.79E-12 | 1.20E-08 | 7.92174605 | TRUE | 610 |
| ENSG00000234 | 0.11732123 | 8.88E-12 | 1.57E-08 | 7.80531799 | TRUE | 611 |
| TBP_1311     | 0.11710952 | 9.68E-12 | 1.71E-08 | 7.7678489  | TRUE | 612 |
| MAFB_219     | 0.1170684  | 9.84E-12 | 1.74E-08 | 7.76057868 | TRUE | 613 |
| TGIF2LX_752  | 0.11579736 | 1.65E-11 | 2.90E-08 | 7.53710575 | TRUE | 614 |
| TGIF2LY_814  | 0.11579736 | 1.65E-11 | 2.90E-08 | 7.53710575 | TRUE | 615 |
| LHX2_651     | 0.11577645 | 1.66E-11 | 2.93E-08 | 7.53344943 | TRUE | 616 |
| SOX7_1246    | 0.11577228 | 1.66E-11 | 2.93E-08 | 7.5327195  | TRUE | 617 |
| LHX2_652     | 0.11574248 | 1.68E-11 | 2.97E-08 | 7.52751058 | TRUE | 618 |

|              |            |          |          |            |      |     |
|--------------|------------|----------|----------|------------|------|-----|
| TFCP2L1_1709 | 0.11554854 | 1.82E-11 | 3.21E-08 | 7.4936396  | TRUE | 619 |
| MEIS1_743    | 0.11461386 | 2.64E-11 | 4.66E-08 | 7.33118852 | TRUE | 620 |
| TFAP2B_2     | 0.11453788 | 2.73E-11 | 4.81E-08 | 7.31803965 | TRUE | 621 |
| CTCF_L288    | 0.11422868 | 3.08E-11 | 5.44E-08 | 7.26462198 | TRUE | 622 |
| PROP1_809    | 0.11395472 | 3.44E-11 | 6.06E-08 | 7.21741028 | TRUE | 623 |
| WT1_378      | 0.11377096 | 3.70E-11 | 6.52E-08 | 7.18580453 | TRUE | 624 |
| YBX1_406     | 0.1136553  | 3.87E-11 | 6.82E-08 | 7.16593767 | TRUE | 625 |
| YBX2_1368    | 0.1136553  | 3.87E-11 | 6.82E-08 | 7.16593767 | TRUE | 626 |
| CSDA_1370    | 0.1136553  | 3.87E-11 | 6.82E-08 | 7.16593767 | TRUE | 627 |
| RARA_1046    | 0.1126622  | 5.72E-11 | 1.01E-07 | 6.99617295 | TRUE | 628 |
| MTF1_388     | 0.11264521 | 5.76E-11 | 1.02E-07 | 6.99328258 | TRUE | 629 |
| GMEB2_1185   | 0.11253624 | 6.01E-11 | 1.06E-07 | 6.97474713 | TRUE | 630 |
| TGIF2_682    | 0.11237643 | 6.40E-11 | 1.13E-07 | 6.94759408 | TRUE | 631 |
| RHOXF1_632   | 0.11229737 | 6.60E-11 | 1.16E-07 | 6.93417692 | TRUE | 632 |
| LHX6_656     | 0.11180958 | 7.98E-11 | 1.41E-07 | 6.85159277 | TRUE | 633 |
| POU1F1_908   | 0.11109824 | 1.05E-10 | 1.85E-07 | 6.73179505 | TRUE | 634 |
| EN1_763      | 0.11076539 | 1.20E-10 | 2.11E-07 | 6.67599703 | TRUE | 635 |
| TBP_1312     | 0.10939666 | 2.02E-10 | 3.56E-07 | 6.44827335 | TRUE | 636 |
| DMBX1_845    | 0.1091351  | 2.23E-10 | 3.93E-07 | 6.40507221 | TRUE | 637 |
| SMAD5_1751   | 0.10911452 | 2.25E-10 | 3.97E-07 | 6.40167834 | TRUE | 638 |
| SMAD9_1755   | 0.10911452 | 2.25E-10 | 3.97E-07 | 6.40167834 | TRUE | 639 |
| ZKSCAN4_387  | 0.1090853  | 2.27E-10 | 4.01E-07 | 6.39685951 | TRUE | 640 |
| ZKSCAN3_390  | 0.1090853  | 2.27E-10 | 4.01E-07 | 6.39685951 | TRUE | 641 |
| AIRE_1187    | 0.10888066 | 2.46E-10 | 4.33E-07 | 6.36314374 | TRUE | 642 |
| ZBED1_1345   | 0.10790689 | 3.55E-10 | 6.26E-07 | 6.20356512 | TRUE | 643 |
| HOXB5_686    | 0.10785599 | 3.62E-10 | 6.38E-07 | 6.1952635  | TRUE | 644 |
| GRHL1_607    | 0.10656185 | 5.86E-10 | 1.03E-06 | 5.98544978 | TRUE | 645 |

|              |            |          |          |            |      |     |
|--------------|------------|----------|----------|------------|------|-----|
| SOX12_1250   | 0.10575422 | 7.90E-10 | 1.39E-06 | 5.85576592 | TRUE | 646 |
| FOXI1_547    | 0.10548486 | 8.73E-10 | 1.54E-06 | 5.8127274  | TRUE | 647 |
| FOXD4_1405   | 0.10548486 | 8.73E-10 | 1.54E-06 | 5.8127274  | TRUE | 648 |
| FOXD4L1_1435 | 0.10548486 | 8.73E-10 | 1.54E-06 | 5.8127274  | TRUE | 649 |
| FOXD4L3_1464 | 0.10548486 | 8.73E-10 | 1.54E-06 | 5.8127274  | TRUE | 650 |
| FOXD4L5_1493 | 0.10548486 | 8.73E-10 | 1.54E-06 | 5.8127274  | TRUE | 651 |
| FOXD4L6_1522 | 0.10548486 | 8.73E-10 | 1.54E-06 | 5.8127274  | TRUE | 652 |
| FOXJ1_1608   | 0.10548486 | 8.73E-10 | 1.54E-06 | 5.8127274  | TRUE | 653 |
| FOXL2_1646   | 0.10548486 | 8.73E-10 | 1.54E-06 | 5.8127274  | TRUE | 654 |
| FOXD4L4_1675 | 0.10548486 | 8.73E-10 | 1.54E-06 | 5.8127274  | TRUE | 655 |
| FOXD4L2_1704 | 0.10548486 | 8.73E-10 | 1.54E-06 | 5.8127274  | TRUE | 656 |
| GBX2_791     | 0.10534932 | 9.17E-10 | 1.62E-06 | 5.79111162 | TRUE | 657 |
| MECP2_987    | 0.10504912 | 1.02E-09 | 1.81E-06 | 5.7433322  | TRUE | 658 |
| IRX4_669     | 0.10478652 | 1.13E-09 | 1.99E-06 | 5.70164605 | TRUE | 659 |
| IRX6_757     | 0.10478652 | 1.13E-09 | 1.99E-06 | 5.70164605 | TRUE | 660 |
| RUNX2_1181   | 0.10474575 | 1.14E-09 | 2.02E-06 | 5.69518417 | TRUE | 661 |
| TFCP2_610    | 0.10442739 | 1.28E-09 | 2.27E-06 | 5.6448012  | TRUE | 662 |
| HOXC12_698   | 0.10397725 | 1.51E-09 | 2.67E-06 | 5.57381855 | TRUE | 663 |
| NHLH2_115    | 0.10292481 | 2.21E-09 | 3.90E-06 | 5.40902368 | TRUE | 664 |
| SMARCC2_997  | 0.10267175 | 2.42E-09 | 4.27E-06 | 5.36964202 | TRUE | 665 |
| GLI3_271     | 0.10246418 | 2.61E-09 | 4.60E-06 | 5.33740929 | TRUE | 666 |
| POU2F1_914   | 0.10239007 | 2.68E-09 | 4.72E-06 | 5.32591668 | TRUE | 667 |
| GBX1_778     | 0.10181731 | 3.28E-09 | 5.79E-06 | 5.23736711 | TRUE | 668 |
| E2F1_448     | 0.10142059 | 3.78E-09 | 6.66E-06 | 5.17631609 | TRUE | 669 |
| OSR1_304     | 0.1012101  | 4.07E-09 | 7.18E-06 | 5.14401827 | TRUE | 670 |
| FOXD4_1403   | 0.10104349 | 4.32E-09 | 7.61E-06 | 5.11849854 | TRUE | 671 |
| FOXD4L1_1433 | 0.10104349 | 4.32E-09 | 7.61E-06 | 5.11849854 | TRUE | 672 |

|              |            |          |          |            |      |     |
|--------------|------------|----------|----------|------------|------|-----|
| FOXD4L3_1462 | 0.10104349 | 4.32E-09 | 7.61E-06 | 5.11849854 | TRUE | 673 |
| FOXD4L5_1491 | 0.10104349 | 4.32E-09 | 7.61E-06 | 5.11849854 | TRUE | 674 |
| FOXD4L6_1520 | 0.10104349 | 4.32E-09 | 7.61E-06 | 5.11849854 | TRUE | 675 |
| FOXL2_1644   | 0.10104349 | 4.32E-09 | 7.61E-06 | 5.11849854 | TRUE | 676 |
| FOXD4L4_1673 | 0.10104349 | 4.32E-09 | 7.61E-06 | 5.11849854 | TRUE | 677 |
| FOXD4L2_1702 | 0.10104349 | 4.32E-09 | 7.61E-06 | 5.11849854 | TRUE | 678 |
| HOMEZ_853    | 0.10037206 | 5.46E-09 | 9.64E-06 | 5.01607116 | TRUE | 679 |
| SRY_1259     | 0.10024841 | 5.70E-09 | 1.01E-05 | 4.99727974 | TRUE | 680 |
| NR4A2_1075   | 0.09986369 | 6.52E-09 | 1.15E-05 | 4.93895933 | TRUE | 681 |
| POU3F3_938   | 0.09975571 | 6.77E-09 | 1.20E-05 | 4.92262911 | TRUE | 682 |
| HES1_59      | 0.09941702 | 7.62E-09 | 1.34E-05 | 4.87151812 | TRUE | 683 |
| YY1_260      | 0.099349   | 7.80E-09 | 1.38E-05 | 4.86127295 | TRUE | 684 |
| ZFP42_1575   | 0.099349   | 7.80E-09 | 1.38E-05 | 4.86127295 | TRUE | 685 |
| PAX4_900     | 0.09907625 | 8.58E-09 | 1.51E-05 | 4.82026318 | TRUE | 686 |
| TP63_1122    | 0.09903316 | 8.70E-09 | 1.54E-05 | 4.8137947  | TRUE | 687 |
| NR3C1_1032   | 0.09886155 | 9.24E-09 | 1.63E-05 | 4.78805848 | TRUE | 688 |
| HLTF_1328    | 0.09845251 | 1.06E-08 | 1.88E-05 | 4.72688777 | TRUE | 689 |
| PRRX1_679    | 0.0982453  | 1.14E-08 | 2.01E-05 | 4.6959944  | TRUE | 690 |
| LHX9_741     | 0.0982453  | 1.14E-08 | 2.01E-05 | 4.6959944  | TRUE | 691 |
| PRRX2_790    | 0.0982453  | 1.14E-08 | 2.01E-05 | 4.6959944  | TRUE | 692 |
| SHOX2_793    | 0.0982453  | 1.14E-08 | 2.01E-05 | 4.6959944  | TRUE | 693 |
| RAX2_807     | 0.0982453  | 1.14E-08 | 2.01E-05 | 4.6959944  | TRUE | 694 |
| ISX_811      | 0.0982453  | 1.14E-08 | 2.01E-05 | 4.6959944  | TRUE | 695 |
| SHOX_841     | 0.0982453  | 1.14E-08 | 2.01E-05 | 4.6959944  | TRUE | 696 |
| YY1_261      | 0.09767947 | 1.39E-08 | 2.44E-05 | 4.61195251 | TRUE | 697 |
| ZFP42_1573   | 0.09767947 | 1.39E-08 | 2.44E-05 | 4.61195251 | TRUE | 698 |
| HNF4A_1021   | 0.09740234 | 1.52E-08 | 2.69E-05 | 4.57096296 | TRUE | 699 |

|             |            |          |            |            |      |     |
|-------------|------------|----------|------------|------------|------|-----|
| HNF4A_1022  | 0.09698045 | 1.76E-08 | 3.10E-05   | 4.50877583 | TRUE | 700 |
| MAX_28      | 0.09679641 | 1.87E-08 | 3.30E-05   | 4.48172982 | TRUE | 701 |
| MSX1_768    | 0.09652349 | 2.05E-08 | 3.62E-05   | 4.44171341 | TRUE | 702 |
| MLL_425     | 0.09651817 | 2.05E-08 | 3.62E-05   | 4.44093369 | TRUE | 703 |
| MECOM_252   | 0.09635118 | 2.17E-08 | 3.83E-05   | 4.4165045  | TRUE | 704 |
| OTP_804     | 0.09616911 | 2.31E-08 | 4.07E-05   | 4.3899154  | TRUE | 705 |
| T_1301      | 0.09581932 | 2.60E-08 | 4.58E-05   | 4.3389683  | TRUE | 706 |
| NR2F1_1094  | 0.09574469 | 2.66E-08 | 4.70E-05   | 4.32812204 | TRUE | 707 |
| ASCL2_124   | 0.09546959 | 2.92E-08 | 5.15E-05   | 4.28820854 | TRUE | 708 |
| HOXA4_1725  | 0.09536691 | 3.02E-08 | 5.33E-05   | 4.27333918 | TRUE | 709 |
| SOX14_1243  | 0.09455983 | 3.95E-08 | 6.97E-05   | 4.15700167 | TRUE | 710 |
| ETS1_481    | 0.09455586 | 3.95E-08 | 6.98E-05   | 4.15643208 | TRUE | 711 |
| MBD2_986    | 0.09419022 | 4.46E-08 | 7.87E-05   | 4.10404084 | TRUE | 712 |
| E2F6_457    | 0.09381039 | 5.05E-08 | 8.92E-05   | 4.04982367 | TRUE | 713 |
| RORA_1009   | 0.09341997 | 5.74E-08 | 0.00010132 | 3.99431381 | TRUE | 714 |
| RORB_1748   | 0.09341997 | 5.74E-08 | 0.00010132 | 3.99431381 | TRUE | 715 |
| KLF6_243    | 0.09317197 | 6.23E-08 | 0.00010986 | 3.95916806 | TRUE | 716 |
| KLF2_1569   | 0.09317197 | 6.23E-08 | 0.00010986 | 3.95916806 | TRUE | 717 |
| TP53_1127   | 0.09307571 | 6.43E-08 | 0.00011336 | 3.94555007 | TRUE | 718 |
| NFATC2_1143 | 0.0928468  | 6.92E-08 | 0.00012212 | 3.91322112 | TRUE | 719 |
| SOX10_1210  | 0.09277902 | 7.08E-08 | 0.00012483 | 3.90366403 | TRUE | 720 |
| TET1_427    | 0.09276803 | 7.10E-08 | 0.00012528 | 3.90211409 | TRUE | 721 |
| TP53_1128   | 0.09210862 | 8.79E-08 | 0.00015506 | 3.80948833 | TRUE | 722 |
| NR3C1_1033  | 0.0915423  | 1.05E-07 | 0.00018602 | 3.73044322 | TRUE | 723 |
| HMG20B_1206 | 0.09153077 | 1.06E-07 | 0.00018671 | 3.72883909 | TRUE | 724 |
| MAFK_216    | 0.09107037 | 1.23E-07 | 0.00021631 | 3.66492898 | TRUE | 725 |
| FOXI2_572   | 0.09065349 | 1.40E-07 | 0.00024699 | 3.60732672 | TRUE | 726 |

|              |            |          |            |            |      |     |
|--------------|------------|----------|------------|------------|------|-----|
| FOXD4_1389   | 0.09065349 | 1.40E-07 | 0.00024699 | 3.60732672 | TRUE | 727 |
| FOXD4L1_1419 | 0.09065349 | 1.40E-07 | 0.00024699 | 3.60732672 | TRUE | 728 |
| FOXD4L3_1448 | 0.09065349 | 1.40E-07 | 0.00024699 | 3.60732672 | TRUE | 729 |
| FOXD4L5_1477 | 0.09065349 | 1.40E-07 | 0.00024699 | 3.60732672 | TRUE | 730 |
| FOXD4L6_1506 | 0.09065349 | 1.40E-07 | 0.00024699 | 3.60732672 | TRUE | 731 |
| FOXJ1_1594   | 0.09065349 | 1.40E-07 | 0.00024699 | 3.60732672 | TRUE | 732 |
| FOXD4L4_1659 | 0.09065349 | 1.40E-07 | 0.00024699 | 3.60732672 | TRUE | 733 |
| FOXD4L2_1688 | 0.09065349 | 1.40E-07 | 0.00024699 | 3.60732672 | TRUE | 734 |
| SIX1_704     | 0.08979405 | 1.84E-07 | 0.00032406 | 3.48936827 | TRUE | 735 |
| OTX2_785     | 0.08948311 | 2.03E-07 | 0.00035731 | 3.44695542 | TRUE | 736 |
| NR2F6_1077   | 0.08846837 | 2.78E-07 | 0.00049032 | 3.30951772 | TRUE | 737 |
| POU2F3_912   | 0.08794674 | 3.27E-07 | 0.00057617 | 3.23944862 | TRUE | 738 |
| NRL_170      | 0.08768617 | 3.54E-07 | 0.00062432 | 3.20459403 | TRUE | 739 |
| E2F1_447     | 0.0870763  | 4.27E-07 | 0.00075266 | 3.12340026 | TRUE | 740 |
| TFAP2A_12    | 0.08707345 | 4.27E-07 | 0.00075332 | 3.12302268 | TRUE | 741 |
| SP2_330      | 0.08636436 | 5.30E-07 | 0.00093476 | 3.02929961 | TRUE | 742 |
| FOXK1_544    | 0.08573068 | 6.42E-07 | 0.00113199 | 2.94615691 | TRUE | 743 |
| FOXD4_1392   | 0.08573068 | 6.42E-07 | 0.00113199 | 2.94615691 | TRUE | 744 |
| FOXD4L1_1422 | 0.08573068 | 6.42E-07 | 0.00113199 | 2.94615691 | TRUE | 745 |
| FOXD4L3_1450 | 0.08573068 | 6.42E-07 | 0.00113199 | 2.94615691 | TRUE | 746 |
| FOXD4L5_1479 | 0.08573068 | 6.42E-07 | 0.00113199 | 2.94615691 | TRUE | 747 |
| FOXD4L6_1508 | 0.08573068 | 6.42E-07 | 0.00113199 | 2.94615691 | TRUE | 748 |
| FOXJ1_1596   | 0.08573068 | 6.42E-07 | 0.00113199 | 2.94615691 | TRUE | 749 |
| FOXL2_1630   | 0.08573068 | 6.42E-07 | 0.00113199 | 2.94615691 | TRUE | 750 |
| FOXD4L4_1661 | 0.08573068 | 6.42E-07 | 0.00113199 | 2.94615691 | TRUE | 751 |
| FOXD4L2_1690 | 0.08573068 | 6.42E-07 | 0.00113199 | 2.94615691 | TRUE | 752 |
| ZBTB6_385    | 0.08555405 | 6.77E-07 | 0.00119375 | 2.92308557 | TRUE | 753 |

|            |            |          |            |            |      |     |
|------------|------------|----------|------------|------------|------|-----|
| TEAD1_1319 | 0.08505992 | 7.85E-07 | 0.00138426 | 2.85878216 | TRUE | 754 |
| MIXL1_838  | 0.08442683 | 9.48E-07 | 0.00167144 | 2.77690844 | TRUE | 755 |
| E2F4_459   | 0.08391856 | 1.10E-06 | 0.00194269 | 2.71159619 | TRUE | 756 |
| THRB_1067  | 0.08341256 | 1.28E-06 | 0.00225452 | 2.64694545 | TRUE | 757 |
| VENTX_750  | 0.08297026 | 1.45E-06 | 0.00256605 | 2.59073404 | TRUE | 758 |
| TFDP2_434  | 0.08246227 | 1.69E-06 | 0.00297493 | 2.52652295 | TRUE | 759 |
| TFDP3_435  | 0.08246227 | 1.69E-06 | 0.00297493 | 2.52652295 | TRUE | 760 |
| TFDP1_436  | 0.08246227 | 1.69E-06 | 0.00297493 | 2.52652295 | TRUE | 761 |
| NKX22_703  | 0.0822893  | 1.77E-06 | 0.00312793 | 2.50474329 | TRUE | 762 |
| BARHL2_740 | 0.08215885 | 1.84E-06 | 0.00324828 | 2.48834612 | TRUE | 763 |
| MYF6_54    | 0.08140096 | 2.29E-06 | 0.00404049 | 2.39356635 | TRUE | 764 |
| MYF5_1557  | 0.08140096 | 2.29E-06 | 0.00404049 | 2.39356635 | TRUE | 765 |
| LHX5_628   | 0.0813585  | 2.32E-06 | 0.00408996 | 2.38828088 | TRUE | 766 |
| LHX1_718   | 0.0813585  | 2.32E-06 | 0.00408996 | 2.38828088 | TRUE | 767 |
| TBPL2_1315 | 0.08116523 | 2.45E-06 | 0.0043226  | 2.36425515 | TRUE | 768 |
| SP2_331    | 0.08085446 | 2.68E-06 | 0.00472351 | 2.32573553 | TRUE | 769 |
| RXRA_1104  | 0.0791594  | 4.32E-06 | 0.00761959 | 2.11806823 | TRUE | 770 |
| FOXO3_526  | 0.07903181 | 4.48E-06 | 0.0078958  | 2.10260366 | TRUE | 771 |
| EMX2_799   | 0.0790009  | 4.51E-06 | 0.00796415 | 2.09886058 | TRUE | 772 |
| HINFP_347  | 0.0789941  | 4.52E-06 | 0.00797926 | 2.09803724 | TRUE | 773 |
| RXRG_1058  | 0.07898834 | 4.53E-06 | 0.00799209 | 2.09733953 | TRUE | 774 |
| MAFK_217   | 0.07898033 | 4.54E-06 | 0.00800995 | 2.09637022 | TRUE | 775 |
| ZNF143_328 | 0.07876033 | 4.83E-06 | 0.00851577 | 2.06977609 | TRUE | 776 |
| GATA1_589  | 0.07861195 | 5.03E-06 | 0.00887405 | 2.05187791 | TRUE | 777 |
| HSFY2_947  | 0.07859751 | 5.05E-06 | 0.00890967 | 2.05013843 | TRUE | 778 |
| HSFY1_949  | 0.07859751 | 5.05E-06 | 0.00890967 | 2.05013843 | TRUE | 779 |
| E2F2_440   | 0.07856796 | 5.09E-06 | 0.00898301 | 2.04657818 | TRUE | 780 |

|             |            |          |            |            |      |     |
|-------------|------------|----------|------------|------------|------|-----|
| HOXA4_1724  | 0.07825183 | 5.56E-06 | 0.00980458 | 2.00857081 | TRUE | 781 |
| GMEB2_1184  | 0.07801563 | 5.93E-06 | 0.01046484 | 1.9802673  | TRUE | 782 |
| TP73_1125   | 0.0770078  | 7.82E-06 | 0.01379132 | 1.86039421 | TRUE | 783 |
| DMRTC2_1582 | 0.07655892 | 8.83E-06 | 0.01557863 | 1.80747085 | TRUE | 784 |
| MAFF_212    | 0.07632734 | 9.40E-06 | 0.01658517 | 1.78028006 | TRUE | 785 |
| HINFP_348   | 0.07537259 | 1.21E-05 | 0.02142961 | 1.66898573 | TRUE | 786 |
| SOX21_1221  | 0.07485299 | 1.39E-05 | 0.02460579 | 1.60896267 | TRUE | 787 |
| RORC_1062   | 0.07448853 | 1.54E-05 | 0.02709631 | 1.56708987 | TRUE | 788 |
| RORB_1746   | 0.07448853 | 1.54E-05 | 0.02709631 | 1.56708987 | TRUE | 789 |
| NR4A2_1076  | 0.0736293  | 1.92E-05 | 0.03395294 | 1.4691226  | TRUE | 790 |
| NR2E1_1029  | 0.07316809 | 2.17E-05 | 0.03828523 | 1.41696874 | TRUE | 791 |
| BCL6_277    | 0.07312581 | 2.19E-05 | 0.03870763 | 1.41220336 | TRUE | 792 |
| STAT5A_1270 | 0.07302334 | 2.25E-05 | 0.03975    | 1.40066284 | TRUE | 793 |
| POU4F2_923  | 0.07264764 | 2.48E-05 | 0.04380467 | 1.35847959 | TRUE | 794 |
| POU3F2_930  | 0.07264715 | 2.48E-05 | 0.04381024 | 1.35842435 | TRUE | 795 |
| CREBZF_227  | 0.07232496 | 2.70E-05 | 0.04759826 | 1.32240894 | TRUE | 796 |
| ZIC3_309    | 0.0720833  | 2.87E-05 | 0.05064166 | 1.29549203 | TRUE | 797 |
| DNMT1_426   | 0.07078129 | 4.00E-05 | 0.07048644 | 1.1518944  | TRUE | 798 |
| ZBTB4_354   | 0.07049202 | 4.30E-05 | 0.07580238 | 1.12031714 | TRUE | 799 |
| EOMES_1299  | 0.07039114 | 4.41E-05 | 0.07774398 | 1.10933324 | TRUE | 800 |
| FOS_199     | 0.06957441 | 5.40E-05 | 0.09529445 | 1.02093238 | TRUE | 801 |
| EGR2_286    | 0.06948883 | 5.52E-05 | 0.09733642 | 1.01172463 | TRUE | 802 |
| ZFH3_736    | 0.06932557 | 5.75E-05 | 0.10134759 | 0.99418659 | TRUE | 803 |
| PAX7_891    | 0.06915966 | 5.99E-05 | 0.10558406 | 0.97640165 | TRUE | 804 |
| TGIF1_821   | 0.06904472 | 6.16E-05 | 0.10861652 | 0.9641041  | TRUE | 805 |
| SIM1_56     | 0.06865753 | 6.77E-05 | 0.11944962 | 0.92281524 | TRUE | 806 |
| NPAS1_77    | 0.06865753 | 6.77E-05 | 0.11944962 | 0.92281524 | TRUE | 807 |



|              |            |            |            |            |      |     |
|--------------|------------|------------|------------|------------|------|-----|
| NPAS3_90     | 0.06865753 | 6.77E-05   | 0.11944962 | 0.92281524 | TRUE | 808 |
| SIM2_93      | 0.06865753 | 6.77E-05   | 0.11944962 | 0.92281524 | TRUE | 809 |
| SIM2_139     | 0.06865753 | 6.77E-05   | 0.11944962 | 0.92281524 | TRUE | 810 |
| NR4A2_1074   | 0.06831757 | 7.36E-05   | 0.12979649 | 0.88673706 | TRUE | 811 |
| C11orf9_1004 | 0.06821248 | 7.55E-05   | 0.13316276 | 0.87561721 | TRUE | 812 |
| TCF7L1_1241  | 0.06818475 | 7.60E-05   | 0.13406455 | 0.87268606 | TRUE | 813 |
| TP73_1124    | 0.06706395 | 9.96E-05   | 0.17574939 | 0.75510616 | TRUE | 814 |
| RARG_1088    | 0.06653362 | 0.00011309 | 0.19948636 | 0.70008678 | TRUE | 815 |
| HOXC5_847    | 0.06646141 | 0.00011505 | 0.20294306 | 0.69262579 | TRUE | 816 |
| NKX63_779    | 0.06594555 | 0.00013001 | 0.22932973 | 0.63953963 | TRUE | 817 |
| NOBOX_647    | 0.06576852 | 0.00013555 | 0.23910653 | 0.62140856 | TRUE | 818 |
| HOXA4_1729   | 0.06558391 | 0.00014156 | 0.24971944 | 0.60254764 | TRUE | 819 |
| NANOGP1_152  | 0.06542259 | 0.00014703 | 0.25935488 | 0.58610558 | TRUE | 820 |
| ZIC4_358     | 0.06532797 | 0.00015032 | 0.26516823 | 0.57647851 | TRUE | 821 |
| SOX30_1205   | 0.06525406 | 0.00015294 | 0.2697945  | 0.56896691 | TRUE | 822 |
| ARID5A_22    | 0.06483629 | 0.0001686  | 0.29740226 | 0.52665574 | TRUE | 823 |
| EGR1_285     | 0.06448319 | 0.00018299 | 0.32278679 | 0.49108424 | TRUE | 824 |
| HOXB3_688    | 0.06425952 | 0.00019269 | 0.33990497 | 0.46864248 | TRUE | 825 |
| POU3F2_931   | 0.0639917  | 0.00020495 | 0.36152396 | 0.44186291 | TRUE | 826 |
| TFAP4_44     | 0.06366113 | 0.00022108 | 0.38998966 | 0.40894691 | TRUE | 827 |
| NFATC3_1139  | 0.06346896 | 0.000231   | 0.40749001 | 0.38988304 | TRUE | 828 |
| CIC_1207     | 0.06321588 | 0.00024471 | 0.43166369 | 0.36485448 | TRUE | 829 |
| OSR2_322     | 0.06317565 | 0.00024695 | 0.43562759 | 0.36088462 | TRUE | 830 |
| POU6F1_835   | 0.06301848 | 0.00025592 | 0.45144502 | 0.34539513 | TRUE | 831 |
| TAL1_95      | 0.06253299 | 0.00028558 | 0.50376905 | 0.29776851 | TRUE | 832 |
| LYL1_1350    | 0.06253299 | 0.00028558 | 0.50376905 | 0.29776851 | TRUE | 833 |
| TAL2_1361    | 0.06253299 | 0.00028558 | 0.50376905 | 0.29776851 | TRUE | 834 |

|              |            |            |            |            |      |     |
|--------------|------------|------------|------------|------------|------|-----|
| THAP1_1323   | 0.0621566  | 0.00031076 | 0.54818843 | 0.26107013 | TRUE | 835 |
| ISL2_758     | 0.06209949 | 0.00031476 | 0.5552397  | 0.25551949 | TRUE | 836 |
| FOXB1_551    | 0.06182886 | 0.00033437 | 0.5898239  | 0.22927763 | TRUE | 837 |
| FOXD4_1404   | 0.06182886 | 0.00033437 | 0.5898239  | 0.22927763 | TRUE | 838 |
| FOXD4L1_1434 | 0.06182886 | 0.00033437 | 0.5898239  | 0.22927763 | TRUE | 839 |
| FOXD4L3_1463 | 0.06182886 | 0.00033437 | 0.5898239  | 0.22927763 | TRUE | 840 |
| FOXD4L5_1492 | 0.06182886 | 0.00033437 | 0.5898239  | 0.22927763 | TRUE | 841 |
| FOXD4L6_1521 | 0.06182886 | 0.00033437 | 0.5898239  | 0.22927763 | TRUE | 842 |
| FOXJ1_1607   | 0.06182886 | 0.00033437 | 0.5898239  | 0.22927763 | TRUE | 843 |
| FOXL2_1645   | 0.06182886 | 0.00033437 | 0.5898239  | 0.22927763 | TRUE | 844 |
| FOXD4L4_1674 | 0.06182886 | 0.00033437 | 0.5898239  | 0.22927763 | TRUE | 845 |
| FOXD4L2_1703 | 0.06182886 | 0.00033437 | 0.5898239  | 0.22927763 | TRUE | 846 |
| ZFH3_737     | 0.06146057 | 0.00036289 | 0.64013315 | 0.19372968 | TRUE | 847 |
| NFE2L1_145   | 0.06126396 | 0.00037903 | 0.66860595 | 0.17482976 | TRUE | 848 |
| NFE2L3_1562  | 0.06126396 | 0.00037903 | 0.66860595 | 0.17482976 | TRUE | 849 |
| POU1F1_906   | 0.06088702 | 0.00041187 | 0.72653113 | 0.13874577 | TRUE | 850 |
| SREBF1_41    | 0.06062878 | 0.00043587 | 0.76888262 | 0.11413996 | TRUE | 851 |
| NR3C1_1031   | 0.06062279 | 0.00043645 | 0.76989156 | 0.11357044 | TRUE | 852 |
| FOXM1_522    | 0.05901005 | 0.00061871 | 1          | 0          | TRUE | 853 |
| POU4F2_924   | 0.05856399 | 0.00068041 | 1          | 0          | TRUE | 854 |
| ESRRA_1091   | 0.05844709 | 0.0006975  | 1          | 0          | TRUE | 855 |
| NKX1_2_869   | 0.05760788 | 0.00083238 | 1          | 0          | TRUE | 856 |
| HOXD12_796   | 0.05757607 | 0.00083794 | 1          | 0          | TRUE | 857 |
| SRF_981      | 0.05716012 | 0.00091388 | 1          | 0          | TRUE | 858 |
| IRX1_800     | 0.05674968 | 0.00099502 | 1          | 0          | TRUE | 859 |
| IRX3_822     | 0.05674968 | 0.00099502 | 1          | 0          | TRUE | 860 |
| SIX5_817     | 0.05661581 | 0.00102289 | 1          | 0          | TRUE | 861 |

|              |            |            |   |   |      |     |
|--------------|------------|------------|---|---|------|-----|
| HOXD13_713   | 0.05629897 | 0.00109176 | 1 | 0 | TRUE | 862 |
| ARNT_88      | 0.05629888 | 0.00109178 | 1 | 0 | TRUE | 863 |
| POU6F2_910   | 0.05515429 | 0.00137789 | 1 | 0 | TRUE | 864 |
| POU5F1B_942  | 0.05514618 | 0.00138014 | 1 | 0 | TRUE | 865 |
| POU2F2_904   | 0.05499727 | 0.00142213 | 1 | 0 | TRUE | 866 |
| POU3F1_933   | 0.05411654 | 0.00169549 | 1 | 0 | TRUE | 867 |
| ZNF691_319   | 0.0535427  | 0.00189876 | 1 | 0 | TRUE | 868 |
| MYBL2_993    | 0.05328023 | 0.001999   | 1 | 0 | TRUE | 869 |
| ZBTB4_355    | 0.05309761 | 0.00207158 | 1 | 0 | TRUE | 870 |
| SOX6_1760    | 0.05288843 | 0.00215768 | 1 | 0 | TRUE | 871 |
| NR2F2_1103   | 0.05234874 | 0.00239519 | 1 | 0 | TRUE | 872 |
| TFAP2E_11    | 0.05223213 | 0.00244955 | 1 | 0 | TRUE | 873 |
| RARG_1087    | 0.05148548 | 0.00282523 | 1 | 0 | TRUE | 874 |
| NR1H3_1006   | 0.05079731 | 0.00321731 | 1 | 0 | TRUE | 875 |
| NR1H2_1045   | 0.05079731 | 0.00321731 | 1 | 0 | TRUE | 876 |
| ESR2_1056    | 0.05076438 | 0.00323725 | 1 | 0 | TRUE | 877 |
| EGR4_298     | 0.05054479 | 0.00337318 | 1 | 0 | TRUE | 878 |
| POU3F1_934   | 0.05040796 | 0.00346049 | 1 | 0 | TRUE | 879 |
| FOXE1_564    | 0.05021158 | 0.00358938 | 1 | 0 | TRUE | 880 |
| FOXD4_1393   | 0.05021158 | 0.00358938 | 1 | 0 | TRUE | 881 |
| FOXD4L1_1423 | 0.05021158 | 0.00358938 | 1 | 0 | TRUE | 882 |
| FOXD4L3_1452 | 0.05021158 | 0.00358938 | 1 | 0 | TRUE | 883 |
| FOXD4L5_1481 | 0.05021158 | 0.00358938 | 1 | 0 | TRUE | 884 |
| FOXD4L6_1510 | 0.05021158 | 0.00358938 | 1 | 0 | TRUE | 885 |
| FOXJ1_1597   | 0.05021158 | 0.00358938 | 1 | 0 | TRUE | 886 |
| FOXL2_1634   | 0.05021158 | 0.00358938 | 1 | 0 | TRUE | 887 |
| FOXD4L4_1663 | 0.05021158 | 0.00358938 | 1 | 0 | TRUE | 888 |

|              |            |            |   |   |      |     |
|--------------|------------|------------|---|---|------|-----|
| FOXD4L2_1692 | 0.05021158 | 0.00358938 | 1 | 0 | TRUE | 889 |
| NR2F2_1102   | 0.04977273 | 0.00389335 | 1 | 0 | TRUE | 890 |
| SOX17_1242   | 0.04929334 | 0.00425195 | 1 | 0 | TRUE | 891 |
| FOXP1_524    | 0.0488124  | 0.00464154 | 1 | 0 | TRUE | 892 |
| TBP_1313     | 0.04860117 | 0.00482264 | 1 | 0 | TRUE | 893 |
| EMX1_726     | 0.0479494  | 0.00542245 | 1 | 0 | TRUE | 894 |
| HOXB4_832    | 0.04747704 | 0.00589836 | 1 | 0 | TRUE | 895 |
| E2F2_438     | 0.04718308 | 0.00621322 | 1 | 0 | TRUE | 896 |
| NKX11_882    | 0.04706512 | 0.00634375 | 1 | 0 | TRUE | 897 |
| HINFP_349    | 0.04674614 | 0.00670919 | 1 | 0 | TRUE | 898 |
| ATF2_158     | 0.04647492 | 0.00703468 | 1 | 0 | TRUE | 899 |
| BARHL1_701   | 0.0464393  | 0.00707846 | 1 | 0 | TRUE | 900 |
| AHR_52       | 0.04552697 | 0.00828654 | 1 | 0 | TRUE | 901 |
| ZNF423_264   | 0.04510761 | 0.00890128 | 1 | 0 | TRUE | 902 |
| POU3F2_927   | 0.04471473 | 0.00951383 | 1 | 0 | TRUE | 903 |
| THAP1_1324   | 0.04421691 | 0.0103438  | 1 | 0 | TRUE | 904 |
| E2F2_439     | 0.04409163 | 0.01056256 | 1 | 0 | TRUE | 905 |
| FOXQ1_542    | 0.04400171 | 0.01072211 | 1 | 0 | TRUE | 906 |
| VTN_665      | 0.04391877 | 0.01087116 | 1 | 0 | TRUE | 907 |
| HSF2_945     | 0.04370411 | 0.01126551 | 1 | 0 | TRUE | 908 |
| TFAP2A_13    | 0.04348299 | 0.01168494 | 1 | 0 | TRUE | 909 |
| MYF5_1556    | 0.04329919 | 0.01204408 | 1 | 0 | TRUE | 910 |
| SMAD3_1196   | 0.04325554 | 0.01213079 | 1 | 0 | TRUE | 911 |
| SMAD9_1756   | 0.04325554 | 0.01213079 | 1 | 0 | TRUE | 912 |
| ZNF143_326   | 0.04312696 | 0.01238944 | 1 | 0 | TRUE | 913 |
| BRCA1_461    | 0.0428944  | 0.01286967 | 1 | 0 | TRUE | 914 |
| REST_248     | 0.04280294 | 0.01306301 | 1 | 0 | TRUE | 915 |

|             |            |            |   |   |      |     |
|-------------|------------|------------|---|---|------|-----|
| ARID5B_19   | 0.0427873  | 0.01309631 | 1 | 0 | TRUE | 916 |
| PROP1_810   | 0.04273678 | 0.01320446 | 1 | 0 | TRUE | 917 |
| YY2_398     | 0.04253757 | 0.01363855 | 1 | 0 | TRUE | 918 |
| ZIC1_306    | 0.04078956 | 0.01802054 | 1 | 0 | TRUE | 919 |
| SOX15_1234  | 0.04059899 | 0.0185658  | 1 | 0 | TRUE | 920 |
| MAFF_213    | 0.03975399 | 0.02116098 | 1 | 0 | TRUE | 921 |
| PPARG_1051  | 0.03947845 | 0.02207293 | 1 | 0 | TRUE | 922 |
| PPARA_1109  | 0.03933028 | 0.02257733 | 1 | 0 | TRUE | 923 |
| POU2F1_917  | 0.03830613 | 0.02634527 | 1 | 0 | TRUE | 924 |
| LHX6_657    | 0.03824851 | 0.02657252 | 1 | 0 | TRUE | 925 |
| TAL1_94     | 0.03802187 | 0.02748288 | 1 | 0 | TRUE | 926 |
| LYL1_1349   | 0.03802187 | 0.02748288 | 1 | 0 | TRUE | 927 |
| TAL2_1360   | 0.03802187 | 0.02748288 | 1 | 0 | TRUE | 928 |
| NRF1_1331   | 0.03800899 | 0.02753539 | 1 | 0 | TRUE | 929 |
| E2F4_460    | 0.03777748 | 0.02849452 | 1 | 0 | TRUE | 930 |
| POU3F3_940  | 0.03732382 | 0.03045765 | 1 | 0 | TRUE | 931 |
| PKNOX1_760  | 0.03730206 | 0.03055466 | 1 | 0 | TRUE | 932 |
| ZBTB1_294   | 0.03636958 | 0.03496861 | 1 | 0 | TRUE | 933 |
| LMX1A_762   | 0.03633611 | 0.03513663 | 1 | 0 | TRUE | 934 |
| UNCX_777    | 0.03633611 | 0.03513663 | 1 | 0 | TRUE | 935 |
| CBFB_1327   | 0.03600768 | 0.03682266 | 1 | 0 | TRUE | 936 |
| TFCP2_608   | 0.03495613 | 0.04269119 | 1 | 0 | TRUE | 937 |
| SPDEF_476   | 0.03475906 | 0.04387471 | 1 | 0 | TRUE | 938 |
| NFE2L2_159  | 0.03397708 | 0.04884746 | 1 | 0 | TRUE | 939 |
| NFE2L3_1563 | 0.03397708 | 0.04884746 | 1 | 0 | TRUE | 940 |
| NKX62_1721  | 0.03263908 | 0.05845043 | 1 | 0 | TRUE | 941 |
| PHOX2A_782  | 0.03210474 | 0.06270054 | 1 | 0 | TRUE | 942 |

|              |            |            |   |   |      |     |
|--------------|------------|------------|---|---|------|-----|
| BARX1_716    | 0.03122033 | 0.0702944  | 1 | 0 | TRUE | 943 |
| TLX2_672     | 0.0301593  | 0.08038321 | 1 | 0 | TRUE | 944 |
| IRX2_801     | 0.03012868 | 0.08069095 | 1 | 0 | TRUE | 945 |
| FOXD3_574    | 0.03008834 | 0.08109793 | 1 | 0 | TRUE | 946 |
| ETV5_507     | 0.02971357 | 0.08495833 | 1 | 0 | TRUE | 947 |
| PITX3_661    | 0.02931138 | 0.08926502 | 1 | 0 | TRUE | 948 |
| UBP1_612     | 0.02905877 | 0.09205865 | 1 | 0 | TRUE | 949 |
| TFCP2L1_1712 | 0.02905877 | 0.09205865 | 1 | 0 | TRUE | 950 |
| NKX25_833    | 0.02872868 | 0.09581454 | 1 | 0 | TRUE | 951 |
| PHOX2B_666   | 0.0285332  | 0.09809605 | 1 | 0 | TRUE | 952 |
| ZFP161_1579  | 0.02844059 | 0.09919192 | 1 | 0 | TRUE | 953 |
| ESRRA_1093   | 0.02833701 | 0.10042911 | 1 | 0 | TRUE | 954 |
| NR1D1_1044   | 0.0282523  | 0.10145007 | 1 | 0 | TRUE | 955 |
| NR1D2_1550   | 0.0282523  | 0.10145007 | 1 | 0 | TRUE | 956 |
| GMEB1_1188   | 0.02800241 | 0.10451007 | 1 | 0 | TRUE | 957 |
| PPARA_1107   | 0.02782085 | 0.10677887 | 1 | 0 | TRUE | 958 |
| HOXA4_1727   | 0.02761373 | 0.10941458 | 1 | 0 | TRUE | 959 |
| POU6F1_836   | 0.02760173 | 0.10956886 | 1 | 0 | TRUE | 960 |
| CREB3L1_189  | 0.02724282 | 0.11426286 | 1 | 0 | TRUE | 961 |
| NFATC1_1153  | 0.0269888  | 0.11767948 | 1 | 0 | TRUE | 962 |
| MEOX2_649    | 0.0269446  | 0.11828212 | 1 | 0 | TRUE | 963 |
| HOXA4_1734   | 0.02640815 | 0.12579044 | 1 | 0 | TRUE | 964 |
| ANHX_862     | 0.02636892 | 0.12635376 | 1 | 0 | TRUE | 965 |
| TBX19_1297   | 0.02523007 | 0.14357741 | 1 | 0 | TRUE | 966 |
| E2F1_444     | 0.02514524 | 0.14492923 | 1 | 0 | TRUE | 967 |
| PAX2_896     | 0.02472338 | 0.15179622 | 1 | 0 | TRUE | 968 |
| HSFY2_948    | 0.02458423 | 0.15411479 | 1 | 0 | TRUE | 969 |

|              |            |            |   |   |      |     |
|--------------|------------|------------|---|---|------|-----|
| CUX1_414     | 0.02332344 | 0.17636311 | 1 | 0 | TRUE | 970 |
| TCF7_1208    | 0.02318451 | 0.17895408 | 1 | 0 | TRUE | 971 |
| THRB_1068    | 0.02273617 | 0.18750828 | 1 | 0 | TRUE | 972 |
| RUNX3_1176   | 0.02239254 | 0.19426641 | 1 | 0 | TRUE | 973 |
| MSX2_690     | 0.02215292 | 0.19908345 | 1 | 0 | TRUE | 974 |
| BSX_844      | 0.02215292 | 0.19908345 | 1 | 0 | TRUE | 975 |
| GMEB2_1186   | 0.02199778 | 0.20224832 | 1 | 0 | TRUE | 976 |
| RXRB_1113    | 0.02191954 | 0.20385845 | 1 | 0 | TRUE | 977 |
| KDM2B_424    | 0.02162534 | 0.20999578 | 1 | 0 | TRUE | 978 |
| PITX1_623    | 0.02162114 | 0.21008424 | 1 | 0 | TRUE | 979 |
| RARA_1047    | 0.02142905 | 0.21416425 | 1 | 0 | TRUE | 980 |
| E2F3_451     | 0.02126723 | 0.2176454  | 1 | 0 | TRUE | 981 |
| NR2F6_1078   | 0.01989286 | 0.2488579  | 1 | 0 | TRUE | 982 |
| HOXA5_642    | 0.01973951 | 0.25252535 | 1 | 0 | TRUE | 983 |
| DMRTC2_1583  | 0.01939114 | 0.26099642 | 1 | 0 | TRUE | 984 |
| ETV1_463     | 0.01934903 | 0.26203341 | 1 | 0 | TRUE | 985 |
| NPAS4_112    | 0.01885929 | 0.27430417 | 1 | 0 | TRUE | 986 |
| TCF3_40      | 0.0184051  | 0.28602958 | 1 | 0 | TRUE | 987 |
| GCM1_604     | 0.01752187 | 0.30978823 | 1 | 0 | TRUE | 988 |
| ONECUT2_411  | 0.01730458 | 0.31582755 | 1 | 0 | TRUE | 989 |
| TBX21_1285   | 0.01699052 | 0.32469191 | 1 | 0 | TRUE | 990 |
| TFAP4_46     | 0.01669206 | 0.33326467 | 1 | 0 | TRUE | 991 |
| HOXD3_706    | 0.01567381 | 0.36359912 | 1 | 0 | TRUE | 992 |
| FOXC2_563    | 0.01521292 | 0.37787954 | 1 | 0 | TRUE | 993 |
| FOXD4_1406   | 0.01521292 | 0.37787954 | 1 | 0 | TRUE | 994 |
| FOXD4L1_1436 | 0.01521292 | 0.37787954 | 1 | 0 | TRUE | 995 |
| FOXD4L3_1465 | 0.01521292 | 0.37787954 | 1 | 0 | TRUE | 996 |

|              |            |            |   |   |      |      |
|--------------|------------|------------|---|---|------|------|
| FOXD4L5_1494 | 0.01521292 | 0.37787954 | 1 | 0 | TRUE | 997  |
| FOXD4L6_1523 | 0.01521292 | 0.37787954 | 1 | 0 | TRUE | 998  |
| FOXJ1_1609   | 0.01521292 | 0.37787954 | 1 | 0 | TRUE | 999  |
| FOXL2_1647   | 0.01521292 | 0.37787954 | 1 | 0 | TRUE | 1000 |
| FOXD4L4_1676 | 0.01521292 | 0.37787954 | 1 | 0 | TRUE | 1001 |
| FOXD4L2_1705 | 0.01521292 | 0.37787954 | 1 | 0 | TRUE | 1002 |
| ETV4_504     | 0.01516931 | 0.37924849 | 1 | 0 | TRUE | 1003 |
| FOXJ3_580    | 0.01508507 | 0.38190129 | 1 | 0 | TRUE | 1004 |
| FOXN3_1378   | 0.01508507 | 0.38190129 | 1 | 0 | TRUE | 1005 |
| FOXD4_1408   | 0.01508507 | 0.38190129 | 1 | 0 | TRUE | 1006 |
| FOXD4L1_1438 | 0.01508507 | 0.38190129 | 1 | 0 | TRUE | 1007 |
| FOXD4L3_1467 | 0.01508507 | 0.38190129 | 1 | 0 | TRUE | 1008 |
| FOXD4L5_1496 | 0.01508507 | 0.38190129 | 1 | 0 | TRUE | 1009 |
| FOXD4L6_1525 | 0.01508507 | 0.38190129 | 1 | 0 | TRUE | 1010 |
| FOXJ1_1611   | 0.01508507 | 0.38190129 | 1 | 0 | TRUE | 1011 |
| FOXN2_1620   | 0.01508507 | 0.38190129 | 1 | 0 | TRUE | 1012 |
| FOXL2_1649   | 0.01508507 | 0.38190129 | 1 | 0 | TRUE | 1013 |
| FOXD4L4_1678 | 0.01508507 | 0.38190129 | 1 | 0 | TRUE | 1014 |
| FOXD4L2_1707 | 0.01508507 | 0.38190129 | 1 | 0 | TRUE | 1015 |
| NR4A3_1037   | 0.01455867 | 0.39873499 | 1 | 0 | TRUE | 1016 |
| MEIS2_721    | 0.01449984 | 0.40064375 | 1 | 0 | TRUE | 1017 |
| TFAP2A_15    | 0.01408257 | 0.41433832 | 1 | 0 | TRUE | 1018 |
| HOXD11_709   | 0.01399741 | 0.41716664 | 1 | 0 | TRUE | 1019 |
| NKX32_667    | 0.01338619 | 0.43779971 | 1 | 0 | TRUE | 1020 |
| ZHX1_780     | 0.01294812 | 0.45294167 | 1 | 0 | TRUE | 1021 |
| DUXA_849     | 0.01277887 | 0.45887003 | 1 | 0 | TRUE | 1022 |
| ZNF274_346   | 0.01271157 | 0.46123957 | 1 | 0 | TRUE | 1023 |



|             |            |            |   |   |      |      |
|-------------|------------|------------|---|---|------|------|
| CUX1_413    | 0.01256438 | 0.46644502 | 1 | 0 | TRUE | 1024 |
| ZFP42_1576  | 0.01244528 | 0.4706812  | 1 | 0 | TRUE | 1025 |
| UNCX_776    | 0.01184151 | 0.49247845 | 1 | 0 | TRUE | 1026 |
| NR2C1_1039  | 0.01180439 | 0.49383603 | 1 | 0 | TRUE | 1027 |
| SOX4_1219   | 0.01176489 | 0.49528287 | 1 | 0 | TRUE | 1028 |
| HNF4A_1023  | 0.01129998 | 0.51247982 | 1 | 0 | TRUE | 1029 |
| BACH1_187   | 0.01112648 | 0.51897646 | 1 | 0 | TRUE | 1030 |
| HMX1_854    | 0.01111886 | 0.51926257 | 1 | 0 | TRUE | 1031 |
| PPARG_1052  | 0.01104227 | 0.52214502 | 1 | 0 | TRUE | 1032 |
| EGR3_369    | 0.01072294 | 0.53424962 | 1 | 0 | TRUE | 1033 |
| HMX3_842    | 0.010532   | 0.54155446 | 1 | 0 | TRUE | 1034 |
| STAT4_1274  | 0.01045987 | 0.54432688 | 1 | 0 | TRUE | 1035 |
| CENPB_405   | 0.01002834 | 0.56105917 | 1 | 0 | TRUE | 1036 |
| NEUROD1_96  | 0.00998156 | 0.56288776 | 1 | 0 | TRUE | 1037 |
| NEUROD4_135 | 0.00998156 | 0.56288776 | 1 | 0 | TRUE | 1038 |
| NEUROD6_135 | 0.00998156 | 0.56288776 | 1 | 0 | TRUE | 1039 |
| HOXD11_710  | 0.00993928 | 0.56454292 | 1 | 0 | TRUE | 1040 |
| ARID3B_21   | 0.00828242 | 0.63117979 | 1 | 0 | TRUE | 1041 |
| MAFG_214    | 0.00805736 | 0.64048429 | 1 | 0 | TRUE | 1042 |
| HOXC9_829   | 0.00797596 | 0.64386361 | 1 | 0 | TRUE | 1043 |
| HNF4A_1019  | 0.0073323  | 0.67084054 | 1 | 0 | TRUE | 1044 |
| ZFH2_729    | 0.00667809 | 0.69870113 | 1 | 0 | TRUE | 1045 |
| PGR_1013    | 0.00542185 | 0.75332436 | 1 | 0 | TRUE | 1046 |
| TFAP4_43    | 0.0045939  | 0.79003192 | 1 | 0 | TRUE | 1047 |
| FOXP3_510   | 0.0038878  | 0.8217128  | 1 | 0 | TRUE | 1048 |
| STAT5A_1272 | 0.00386373 | 0.82279846 | 1 | 0 | TRUE | 1049 |
| LEF1_1238   | 0.00370197 | 0.83010135 | 1 | 0 | TRUE | 1050 |

|             |            |            |   |   |       |      |
|-------------|------------|------------|---|---|-------|------|
| TFAP2A_16   | 0.00325737 | 0.85024823 | 1 | 0 | TRUE  | 1051 |
| POU4F3_909  | 0.00314667 | 0.85528058 | 1 | 0 | TRUE  | 1052 |
| ARID3A_17   | 0.00242449 | 0.88824398 | 1 | 0 | TRUE  | 1053 |
| HMG2A2_26   | 0.00129148 | 0.94032933 | 1 | 0 | TRUE  | 1054 |
| TFAP2C_10   | 0.00072135 | 0.96664982 | 1 | 0 | TRUE  | 1055 |
| NFE2_165    | 0.00029868 | 0.98618785 | 1 | 0 | TRUE  | 1056 |
| TFAP2A_14   | 0.00020872 | 0.99034782 | 1 | 0 | TRUE  | 1057 |
| PAX5_1134   | -0.0003126 | 0.9855443  | 1 | 0 | FALSE | 1058 |
| RUNX2_1179  | -0.0013657 | 0.93690519 | 1 | 0 | FALSE | 1059 |
| BARX2_619   | -0.001628  | 0.92482467 | 1 | 0 | FALSE | 1060 |
| SP4_269     | -0.0020811 | 0.90399051 | 1 | 0 | FALSE | 1061 |
| PPARD_1027  | -0.0021905 | 0.8989677  | 1 | 0 | FALSE | 1062 |
| FOXH1_541   | -0.0024124 | 0.88879902 | 1 | 0 | FALSE | 1063 |
| ZNF384_293  | -0.0026329 | 0.87870951 | 1 | 0 | FALSE | 1064 |
| TFAP2C_9    | -0.0026411 | 0.87833469 | 1 | 0 | FALSE | 1065 |
| HOXA9_625   | -0.003034  | 0.86040632 | 1 | 0 | FALSE | 1066 |
| RUNX2_1178  | -0.0032421 | 0.85094031 | 1 | 0 | FALSE | 1067 |
| RUNT_1183   | -0.0032421 | 0.85094031 | 1 | 0 | FALSE | 1068 |
| MAF_209     | -0.0044382 | 0.79699127 | 1 | 0 | FALSE | 1069 |
| LMX1B_731   | -0.0044452 | 0.79667792 | 1 | 0 | FALSE | 1070 |
| HOXA13_644  | -0.0049253 | 0.77527663 | 1 | 0 | FALSE | 1071 |
| HIF1A_47    | -0.005537  | 0.74826164 | 1 | 0 | FALSE | 1072 |
| TCF7L2_1240 | -0.0059285 | 0.73112662 | 1 | 0 | FALSE | 1073 |
| BRCA1_462   | -0.0061171 | 0.72291944 | 1 | 0 | FALSE | 1074 |
| E2F7_455    | -0.0061405 | 0.7219063  | 1 | 0 | FALSE | 1075 |
| HOXC12_699  | -0.0073653 | 0.66944773 | 1 | 0 | FALSE | 1076 |
| TFAP2B_4    | -0.0081298 | 0.63748145 | 1 | 0 | FALSE | 1077 |

|              |            |            |   |   |       |      |
|--------------|------------|------------|---|---|-------|------|
| E4F1_333     | -0.0082338 | 0.63318457 | 1 | 0 | FALSE | 1078 |
| ZBTB33_362   | -0.0084999 | 0.62224211 | 1 | 0 | FALSE | 1079 |
| TBX1_1310    | -0.0088584 | 0.60763237 | 1 | 0 | FALSE | 1080 |
| SOX9_1230    | -0.0091798 | 0.59466871 | 1 | 0 | FALSE | 1081 |
| RUNX1_1182   | -0.009313  | 0.58933218 | 1 | 0 | FALSE | 1082 |
| HNF4A_1020   | -0.0100866 | 0.55878369 | 1 | 0 | FALSE | 1083 |
| POU3F3_939   | -0.0105761 | 0.53986291 | 1 | 0 | FALSE | 1084 |
| HOXA9_624    | -0.0105948 | 0.53914767 | 1 | 0 | FALSE | 1085 |
| NANOG_668    | -0.0107611 | 0.53279526 | 1 | 0 | FALSE | 1086 |
| NANOGP1_152  | -0.0107611 | 0.53279526 | 1 | 0 | FALSE | 1087 |
| MSC_117      | -0.0110283 | 0.52267266 | 1 | 0 | FALSE | 1088 |
| NKX61_769    | -0.0119442 | 0.48873392 | 1 | 0 | FALSE | 1089 |
| NKX62_1722   | -0.0119442 | 0.48873392 | 1 | 0 | FALSE | 1090 |
| HOXC10_830   | -0.0120074 | 0.48643445 | 1 | 0 | FALSE | 1091 |
| HOXD13_711   | -0.0120364 | 0.48538376 | 1 | 0 | FALSE | 1092 |
| PRDM4_275    | -0.0123268 | 0.4749163  | 1 | 0 | FALSE | 1093 |
| TCF15_74     | -0.0132012 | 0.44415837 | 1 | 0 | FALSE | 1094 |
| SCXB_128     | -0.0132012 | 0.44415837 | 1 | 0 | FALSE | 1095 |
| SCXA_131     | -0.0132012 | 0.44415837 | 1 | 0 | FALSE | 1096 |
| SOHLH2_1351  | -0.013317  | 0.44017113 | 1 | 0 | FALSE | 1097 |
| CCDC169_SOHL | -0.013317  | 0.44017113 | 1 | 0 | FALSE | 1098 |
| TFAP2B_3     | -0.0141809 | 0.41108557 | 1 | 0 | FALSE | 1099 |
| DMRTC2_1581  | -0.0141946 | 0.41063444 | 1 | 0 | FALSE | 1100 |
| BARHL2_739   | -0.0145531 | 0.3989145  | 1 | 0 | FALSE | 1101 |
| RUNX2_1180   | -0.0152645 | 0.37626366 | 1 | 0 | FALSE | 1102 |
| YY1_259      | -0.0153046 | 0.37501249 | 1 | 0 | FALSE | 1103 |
| ZFP42_1574   | -0.0153046 | 0.37501249 | 1 | 0 | FALSE | 1104 |

|             |            |            |   |   |       |      |
|-------------|------------|------------|---|---|-------|------|
| ZNF410_283  | -0.0154484 | 0.37054039 | 1 | 0 | FALSE | 1105 |
| RORA_1008   | -0.0155622 | 0.36702531 | 1 | 0 | FALSE | 1106 |
| STAT5B_1282 | -0.0169209 | 0.32667927 | 1 | 0 | FALSE | 1107 |
| IRX5_815    | -0.0172215 | 0.31815648 | 1 | 0 | FALSE | 1108 |
| SOX14_1244  | -0.0175766 | 0.30827863 | 1 | 0 | FALSE | 1109 |
| TEAD4_1322  | -0.0180773 | 0.29469879 | 1 | 0 | FALSE | 1110 |
| BBX_1216    | -0.0184712 | 0.28430232 | 1 | 0 | FALSE | 1111 |
| STAT5A_1271 | -0.0189094 | 0.27303189 | 1 | 0 | FALSE | 1112 |
| HMX2_843    | -0.0189904 | 0.27098183 | 1 | 0 | FALSE | 1113 |
| MYF5_1551   | -0.0195845 | 0.25626988 | 1 | 0 | FALSE | 1114 |
| ID2_60      | -0.0203325 | 0.23854939 | 1 | 0 | FALSE | 1115 |
| ID1_75      | -0.0203325 | 0.23854939 | 1 | 0 | FALSE | 1116 |
| SOX10_1213  | -0.0215704 | 0.21115588 | 1 | 0 | FALSE | 1117 |
| DLX4_664    | -0.0216746 | 0.20895793 | 1 | 0 | FALSE | 1118 |
| MAFK_218    | -0.0222749 | 0.19662065 | 1 | 0 | FALSE | 1119 |
| BACH1_185   | -0.0225674 | 0.19080619 | 1 | 0 | FALSE | 1120 |
| GLI1_276    | -0.0227486 | 0.18726759 | 1 | 0 | FALSE | 1121 |
| ZNF713_364  | -0.0228093 | 0.18609234 | 1 | 0 | FALSE | 1122 |
| RORA_1010   | -0.0228336 | 0.1856244  | 1 | 0 | FALSE | 1123 |
| RORB_1749   | -0.0228336 | 0.1856244  | 1 | 0 | FALSE | 1124 |
| RXRB_1114   | -0.0228536 | 0.18523883 | 1 | 0 | FALSE | 1125 |
| ZNF784_372  | -0.0228747 | 0.18483394 | 1 | 0 | FALSE | 1126 |
| PGR_1014    | -0.0233486 | 0.17589686 | 1 | 0 | FALSE | 1127 |
| NR3C1_1035  | -0.0233486 | 0.17589686 | 1 | 0 | FALSE | 1128 |
| ATF6_160    | -0.0233721 | 0.17546141 | 1 | 0 | FALSE | 1129 |
| ZBTB33_361  | -0.0236212 | 0.17090356 | 1 | 0 | FALSE | 1130 |
| CREM_148    | -0.0248898 | 0.14905827 | 1 | 0 | FALSE | 1131 |

|              |            |            |   |   |       |      |
|--------------|------------|------------|---|---|-------|------|
| MYOG_68      | -0.0250994 | 0.14566307 | 1 | 0 | FALSE | 1132 |
| MYF5_1555    | -0.0250994 | 0.14566307 | 1 | 0 | FALSE | 1133 |
| STAT3_1278   | -0.0263795 | 0.12620161 | 1 | 0 | FALSE | 1134 |
| LHX3_658     | -0.0269106 | 0.11874723 | 1 | 0 | FALSE | 1135 |
| MEIS3_635    | -0.0269901 | 0.1176622  | 1 | 0 | FALSE | 1136 |
| FOXJ3_581    | -0.0271013 | 0.11615593 | 1 | 0 | FALSE | 1137 |
| FOXN3_1379   | -0.0271013 | 0.11615593 | 1 | 0 | FALSE | 1138 |
| FOXD4_1409   | -0.0271013 | 0.11615593 | 1 | 0 | FALSE | 1139 |
| FOXD4L1_1439 | -0.0271013 | 0.11615593 | 1 | 0 | FALSE | 1140 |
| FOXD4L3_1468 | -0.0271013 | 0.11615593 | 1 | 0 | FALSE | 1141 |
| FOXD4L5_1497 | -0.0271013 | 0.11615593 | 1 | 0 | FALSE | 1142 |
| FOXD4L6_1526 | -0.0271013 | 0.11615593 | 1 | 0 | FALSE | 1143 |
| FOXJ1_1612   | -0.0271013 | 0.11615593 | 1 | 0 | FALSE | 1144 |
| FOXN2_1621   | -0.0271013 | 0.11615593 | 1 | 0 | FALSE | 1145 |
| FOXL2_1650   | -0.0271013 | 0.11615593 | 1 | 0 | FALSE | 1146 |
| FOXD4L4_1679 | -0.0271013 | 0.11615593 | 1 | 0 | FALSE | 1147 |
| FOXD4L2_1708 | -0.0271013 | 0.11615593 | 1 | 0 | FALSE | 1148 |
| TLX2_673     | -0.0272436 | 0.11425238 | 1 | 0 | FALSE | 1149 |
| PAX2_895     | -0.027259  | 0.11404728 | 1 | 0 | FALSE | 1150 |
| ATF2_157     | -0.0274525 | 0.11150164 | 1 | 0 | FALSE | 1151 |
| NR6A1_1065   | -0.0275488 | 0.11025182 | 1 | 0 | FALSE | 1152 |
| HOXC11_696   | -0.0277708 | 0.10741112 | 1 | 0 | FALSE | 1153 |
| ARNT2_111    | -0.028212  | 0.10193814 | 1 | 0 | FALSE | 1154 |
| TCFL5_48     | -0.0283308 | 0.10050392 | 1 | 0 | FALSE | 1155 |
| SRY_1260     | -0.0286232 | 0.09703987 | 1 | 0 | FALSE | 1156 |
| GLI2_246     | -0.0286237 | 0.09703463 | 1 | 0 | FALSE | 1157 |
| NFATC1_1155  | -0.0288775 | 0.09410584 | 1 | 0 | FALSE | 1158 |

|             |            |            |   |   |       |      |
|-------------|------------|------------|---|---|-------|------|
| FUBP1_1336  | -0.029     | 0.09271888 | 1 | 0 | FALSE | 1159 |
| LIN54_421   | -0.0292809 | 0.08959856 | 1 | 0 | FALSE | 1160 |
| RREB1_290   | -0.0293046 | 0.08933883 | 1 | 0 | FALSE | 1161 |
| BHLHE41_72  | -0.0300517 | 0.08146881 | 1 | 0 | FALSE | 1162 |
| RXRB_1115   | -0.0302797 | 0.07918242 | 1 | 0 | FALSE | 1163 |
| RXRB_1116   | -0.0302797 | 0.07918242 | 1 | 0 | FALSE | 1164 |
| RXRB_1117   | -0.0302797 | 0.07918242 | 1 | 0 | FALSE | 1165 |
| RXRB_1118   | -0.0302797 | 0.07918242 | 1 | 0 | FALSE | 1166 |
| RXRB_1119   | -0.0302797 | 0.07918242 | 1 | 0 | FALSE | 1167 |
| NR1I3_1061  | -0.0303366 | 0.07861985 | 1 | 0 | FALSE | 1168 |
| SCRT2_396   | -0.030417  | 0.07783053 | 1 | 0 | FALSE | 1169 |
| CDX4_715    | -0.0307445 | 0.07468234 | 1 | 0 | FALSE | 1170 |
| ZIC3_308    | -0.0314649 | 0.06812239 | 1 | 0 | FALSE | 1171 |
| TBX21_1283  | -0.0315156 | 0.06767901 | 1 | 0 | FALSE | 1172 |
| PBX4_1720   | -0.0317967 | 0.06526441 | 1 | 0 | FALSE | 1173 |
| NFATC4_1142 | -0.0328981 | 0.05647826 | 1 | 0 | FALSE | 1174 |
| PKNOX1_759  | -0.0331622 | 0.05452397 | 1 | 0 | FALSE | 1175 |
| ZNF274_345  | -0.0331875 | 0.05434027 | 1 | 0 | FALSE | 1176 |
| DMRT3_429   | -0.0334371 | 0.05255064 | 1 | 0 | FALSE | 1177 |
| POU3F2_929  | -0.0336302 | 0.05119993 | 1 | 0 | FALSE | 1178 |
| ZIC1_305    | -0.0336681 | 0.05093833 | 1 | 0 | FALSE | 1179 |
| TFAP2C_6    | -0.0339995 | 0.04869871 | 1 | 0 | FALSE | 1180 |
| MSX1_766    | -0.0341709 | 0.04757251 | 1 | 0 | FALSE | 1181 |
| DLX6_616    | -0.0343868 | 0.04618588 | 1 | 0 | FALSE | 1182 |
| THRA_1043   | -0.0344944 | 0.04550748 | 1 | 0 | FALSE | 1183 |
| TGIF1_820   | -0.0350626 | 0.04206339 | 1 | 0 | FALSE | 1184 |
| POU2F1_919  | -0.0352487 | 0.04098396 | 1 | 0 | FALSE | 1185 |

|            |            |            |   |   |       |      |
|------------|------------|------------|---|---|-------|------|
| TBX20_1302 | -0.0354371 | 0.03991564 | 1 | 0 | FALSE | 1186 |
| CDX1_670   | -0.0368948 | 0.03241977 | 1 | 0 | FALSE | 1187 |
| GLI2_245   | -0.0370993 | 0.03147153 | 1 | 0 | FALSE | 1188 |
| POU4F1_925 | -0.0376235 | 0.02914827 | 1 | 0 | FALSE | 1189 |
| CREB3_154  | -0.0380451 | 0.02738828 | 1 | 0 | FALSE | 1190 |
| SOX9_1229  | -0.0385912 | 0.02524564 | 1 | 0 | FALSE | 1191 |
| HNF4A_1018 | -0.0388727 | 0.02419871 | 1 | 0 | FALSE | 1192 |
| RUNX3_1175 | -0.0388766 | 0.02418443 | 1 | 0 | FALSE | 1193 |
| ATF7_200   | -0.0402308 | 0.01966029 | 1 | 0 | FALSE | 1194 |
| ZNF274_344 | -0.0408619 | 0.01781713 | 1 | 0 | FALSE | 1195 |
| SIX5_816   | -0.0409569 | 0.01755344 | 1 | 0 | FALSE | 1196 |
| HOXD12_797 | -0.0413599 | 0.01647152 | 1 | 0 | FALSE | 1197 |
| RARB_1011  | -0.0415713 | 0.01592781 | 1 | 0 | FALSE | 1198 |
| ZBTB12_394 | -0.0416211 | 0.01580198 | 1 | 0 | FALSE | 1199 |
| ZBTB12_395 | -0.0416211 | 0.01580198 | 1 | 0 | FALSE | 1200 |
| ZBTB12_400 | -0.0416211 | 0.01580198 | 1 | 0 | FALSE | 1201 |
| ZBTB12_401 | -0.0416211 | 0.01580198 | 1 | 0 | FALSE | 1202 |
| ZBTB12_402 | -0.0416211 | 0.01580198 | 1 | 0 | FALSE | 1203 |
| MYC_85     | -0.0425552 | 0.01359961 | 1 | 0 | FALSE | 1204 |
| ZNF740_301 | -0.0432797 | 0.01208272 | 1 | 0 | FALSE | 1205 |
| SOX8_1202  | -0.0437096 | 0.01125523 | 1 | 0 | FALSE | 1206 |
| TP63_1120  | -0.0437527 | 0.01117516 | 1 | 0 | FALSE | 1207 |
| EN1_765    | -0.0439373 | 0.01083779 | 1 | 0 | FALSE | 1208 |
| SOX13_1239 | -0.0441555 | 0.01045048 | 1 | 0 | FALSE | 1209 |
| STAT1_1267 | -0.0442907 | 0.0102168  | 1 | 0 | FALSE | 1210 |
| SOX8_1204  | -0.044502  | 0.00986094 | 1 | 0 | FALSE | 1211 |
| SPDEF_475  | -0.0452082 | 0.00875021 | 1 | 0 | FALSE | 1212 |

|             |            |            |   |   |       |      |
|-------------|------------|------------|---|---|-------|------|
| HOXA13_645  | -0.0452114 | 0.00874539 | 1 | 0 | FALSE | 1213 |
| ATF1_164    | -0.0452432 | 0.00869815 | 1 | 0 | FALSE | 1214 |
| SOX2_1252   | -0.0456293 | 0.00814247 | 1 | 0 | FALSE | 1215 |
| TFAP2B_1    | -0.0460291 | 0.00760057 | 1 | 0 | FALSE | 1216 |
| SOX9_1224   | -0.0461083 | 0.00749717 | 1 | 0 | FALSE | 1217 |
| GCM2_603    | -0.0463012 | 0.00725053 | 1 | 0 | FALSE | 1218 |
| HIC1_360    | -0.0464268 | 0.00709389 | 1 | 0 | FALSE | 1219 |
| LCOR_1137   | -0.0465174 | 0.00698282 | 1 | 0 | FALSE | 1220 |
| BARX1_717   | -0.0488734 | 0.00459043 | 1 | 0 | FALSE | 1221 |
| TBX1_1309   | -0.0492031 | 0.0043227  | 1 | 0 | FALSE | 1222 |
| PATZ1_257   | -0.0496543 | 0.00397927 | 1 | 0 | FALSE | 1223 |
| NR2C2_1098  | -0.0498626 | 0.00382927 | 1 | 0 | FALSE | 1224 |
| POU2F1_920  | -0.0504797 | 0.00341447 | 1 | 0 | FALSE | 1225 |
| TFAP2C_7    | -0.0506684 | 0.00329602 | 1 | 0 | FALSE | 1226 |
| ESR1_1015   | -0.0506769 | 0.00329079 | 1 | 0 | FALSE | 1227 |
| GSX2_828    | -0.0509647 | 0.00311762 | 1 | 0 | FALSE | 1228 |
| HOXA4_1723  | -0.0510139 | 0.00308889 | 1 | 0 | FALSE | 1229 |
| TFCP2_609   | -0.0510787 | 0.00305137 | 1 | 0 | FALSE | 1230 |
| RARG_1089   | -0.0511349 | 0.00301915 | 1 | 0 | FALSE | 1231 |
| NR2C2_1099  | -0.0511446 | 0.00301362 | 1 | 0 | FALSE | 1232 |
| HNF4G_1081  | -0.0512108 | 0.00297618 | 1 | 0 | FALSE | 1233 |
| NR2E1_1028  | -0.0513447 | 0.00290169 | 1 | 0 | FALSE | 1234 |
| CREB3L1_188 | -0.0513895 | 0.00287714 | 1 | 0 | FALSE | 1235 |
| BPTF_1341   | -0.0515938 | 0.00276766 | 1 | 0 | FALSE | 1236 |
| PAX4_901    | -0.0519204 | 0.00260048 | 1 | 0 | FALSE | 1237 |
| HES4_130    | -0.0522843 | 0.00242508 | 1 | 0 | FALSE | 1238 |
| PAX3_903    | -0.0539776 | 0.00174279 | 1 | 0 | FALSE | 1239 |



|              |           |            |   |   |       |      |
|--------------|-----------|------------|---|---|-------|------|
| HOXC11_697   | -0.054006 | 0.00173301 | 1 | 0 | FALSE | 1240 |
| ENSG00000215 | -0.055307 | 0.00133608 | 1 | 0 | FALSE | 1241 |
| ENSG00000217 | -0.055307 | 0.00133608 | 1 | 0 | FALSE | 1242 |
| DUX4_857     | -0.055307 | 0.00133608 | 1 | 0 | FALSE | 1243 |
| ENSG00000225 | -0.055307 | 0.00133608 | 1 | 0 | FALSE | 1244 |
| DUX4_861     | -0.055307 | 0.00133608 | 1 | 0 | FALSE | 1245 |
| DUX4L5_863   | -0.055307 | 0.00133608 | 1 | 0 | FALSE | 1246 |
| DUX4L4_864   | -0.055307 | 0.00133608 | 1 | 0 | FALSE | 1247 |
| DUX4L2_865   | -0.055307 | 0.00133608 | 1 | 0 | FALSE | 1248 |
| DUX4L3_866   | -0.055307 | 0.00133608 | 1 | 0 | FALSE | 1249 |
| DUX4L6_867   | -0.055307 | 0.00133608 | 1 | 0 | FALSE | 1250 |
| ENSG00000228 | -0.055307 | 0.00133608 | 1 | 0 | FALSE | 1251 |
| ENSG00000229 | -0.055307 | 0.00133608 | 1 | 0 | FALSE | 1252 |
| ENSG00000230 | -0.055307 | 0.00133608 | 1 | 0 | FALSE | 1253 |
| ENSG00000230 | -0.055307 | 0.00133608 | 1 | 0 | FALSE | 1254 |
| ENSG00000231 | -0.055307 | 0.00133608 | 1 | 0 | FALSE | 1255 |
| ENSG00000232 | -0.055307 | 0.00133608 | 1 | 0 | FALSE | 1256 |
| ENSG00000233 | -0.055307 | 0.00133608 | 1 | 0 | FALSE | 1257 |
| ENSG00000233 | -0.055307 | 0.00133608 | 1 | 0 | FALSE | 1258 |
| ENSG00000233 | -0.055307 | 0.00133608 | 1 | 0 | FALSE | 1259 |
| DUX4L13_879  | -0.055307 | 0.00133608 | 1 | 0 | FALSE | 1260 |
| ENSG00000234 | -0.055307 | 0.00133608 | 1 | 0 | FALSE | 1261 |
| ENSG00000236 | -0.055307 | 0.00133608 | 1 | 0 | FALSE | 1262 |
| DUX4L13_886  | -0.055307 | 0.00133608 | 1 | 0 | FALSE | 1263 |
| DUX4L13_887  | -0.055307 | 0.00133608 | 1 | 0 | FALSE | 1264 |
| DUX4_888     | -0.055307 | 0.00133608 | 1 | 0 | FALSE | 1265 |
| DUX1_1713    | -0.055307 | 0.00133608 | 1 | 0 | FALSE | 1266 |

|             |            |            |            |            |       |      |
|-------------|------------|------------|------------|------------|-------|------|
| DUX3_1714   | -0.055307  | 0.00133608 | 1          | 0          | FALSE | 1267 |
| PAX5_1132   | -0.0553314 | 0.00132952 | 1          | 0          | FALSE | 1268 |
| SOX18_1265  | -0.0555916 | 0.00126127 | 1          | 0          | FALSE | 1269 |
| CREB3L2_210 | -0.0559422 | 0.00117443 | 1          | 0          | FALSE | 1270 |
| POU2F1_921  | -0.0559442 | 0.00117395 | 1          | 0          | FALSE | 1271 |
| ASCL1_1558  | -0.056023  | 0.00115521 | 1          | 0          | FALSE | 1272 |
| POU3F1_935  | -0.0569385 | 0.0009569  | 1          | 0          | FALSE | 1273 |
| MYCL1_62    | -0.0570474 | 0.00093553 | 1          | 0          | FALSE | 1274 |
| NFAT5_1145  | -0.0572782 | 0.0008917  | 1          | 0          | FALSE | 1275 |
| NR3C2_1072  | -0.0582275 | 0.00073067 | 1          | 0          | FALSE | 1276 |
| SRY_1261    | -0.0582651 | 0.00072489 | 1          | 0          | FALSE | 1277 |
| EOMES_1300  | -0.0586383 | 0.00066975 | 1          | 0          | FALSE | 1278 |
| SOX21_1222  | -0.0589361 | 0.00062857 | 1          | 0          | FALSE | 1279 |
| SOX14_1245  | -0.0609466 | 0.00040651 | 0.71708052 | 0.14443208 | FALSE | 1280 |
| ZNF238_370  | -0.0618659 | 0.00033162 | 0.58496899 | 0.23286716 | FALSE | 1281 |
| ZBTB42_371  | -0.0618659 | 0.00033162 | 0.58496899 | 0.23286716 | FALSE | 1282 |
| EN1_764     | -0.0622186 | 0.00030648 | 0.54062725 | 0.26710206 | FALSE | 1283 |
| RORB_1745   | -0.0627835 | 0.0002699  | 0.47610084 | 0.32230105 | FALSE | 1284 |
| PKNOX2_783  | -0.0634908 | 0.00022986 | 0.40546643 | 0.3920451  | FALSE | 1285 |
| NKX25_834   | -0.0638992 | 0.00020935 | 0.36928879 | 0.43263388 | FALSE | 1286 |
| MGA_142     | -0.0640495 | 0.00020224 | 0.35674999 | 0.44763603 | FALSE | 1287 |
| CREB5_178   | -0.0647789 | 0.00017086 | 0.3013943  | 0.52086497 | FALSE | 1288 |
| ARNTL_79    | -0.0657114 | 0.00013738 | 0.24234504 | 0.61556587 | FALSE | 1289 |
| DLX3_622    | -0.0659296 | 0.0001305  | 0.23019595 | 0.63790233 | FALSE | 1290 |
| DLX2_676    | -0.0659296 | 0.0001305  | 0.23019595 | 0.63790233 | FALSE | 1291 |
| MEIS3_634   | -0.0671111 | 9.85E-05   | 0.173774   | 0.7600152  | FALSE | 1292 |
| PRKRIR_1325 | -0.0672902 | 9.44E-05   | 0.16645712 | 0.77869763 | FALSE | 1293 |

|             |            |          |            |            |       |      |
|-------------|------------|----------|------------|------------|-------|------|
| MAFA_211    | -0.0681798 | 7.61E-05 | 0.13422511 | 0.87216622 | FALSE | 1294 |
| HOXC10_831  | -0.0683328 | 7.33E-05 | 0.12931528 | 0.88835016 | FALSE | 1295 |
| STAT3_1280  | -0.0685947 | 6.88E-05 | 0.12130116 | 0.91613506 | FALSE | 1296 |
| ZNF75A_314  | -0.0688899 | 6.40E-05 | 0.11283084 | 0.94757218 | FALSE | 1297 |
| ZNF75D_386  | -0.0688899 | 6.40E-05 | 0.11283084 | 0.94757218 | FALSE | 1298 |
| ZNF75C_1580 | -0.0688899 | 6.40E-05 | 0.11283084 | 0.94757218 | FALSE | 1299 |
| RXRA_1106   | -0.06918   | 5.96E-05 | 0.1050549  | 0.97858369 | FALSE | 1300 |
| SCRT1_341   | -0.069763  | 5.16E-05 | 0.09093596 | 1.04126435 | FALSE | 1301 |
| SOX21_1223  | -0.0698399 | 5.06E-05 | 0.08921529 | 1.04956068 | FALSE | 1302 |
| GCM1_605    | -0.0699658 | 4.90E-05 | 0.0864622  | 1.06317372 | FALSE | 1303 |
| JDP2_175    | -0.0702607 | 4.55E-05 | 0.08032563 | 1.09514587 | FALSE | 1304 |
| TCF12_86    | -0.070914  | 3.86E-05 | 0.0681672  | 1.16642455 | FALSE | 1305 |
| HOXA6_643   | -0.0713966 | 3.42E-05 | 0.06033107 | 1.21945897 | FALSE | 1306 |
| CUX2_408    | -0.0718911 | 3.02E-05 | 0.05319267 | 1.27414824 | FALSE | 1307 |
| CREB1_161   | -0.0725713 | 2.53E-05 | 0.04467577 | 1.34992791 | FALSE | 1308 |
| JUNB_201    | -0.0730124 | 2.26E-05 | 0.03986288 | 1.39943138 | FALSE | 1309 |
| NFAT5_1144  | -0.0733722 | 2.06E-05 | 0.0363071  | 1.44000848 | FALSE | 1310 |
| THRA_1042   | -0.0739386 | 1.78E-05 | 0.03131356 | 1.50426752 | FALSE | 1311 |
| POU3F2_926  | -0.0743644 | 1.59E-05 | 0.02799801 | 1.55287283 | FALSE | 1312 |
| ETV3_473    | -0.0744369 | 1.56E-05 | 0.0274676  | 1.56117928 | FALSE | 1313 |
| KLF12_281   | -0.0752624 | 1.25E-05 | 0.02206867 | 1.65622375 | FALSE | 1314 |
| KLF2_1567   | -0.0752624 | 1.25E-05 | 0.02206867 | 1.65622375 | FALSE | 1315 |
| HOXA11_614  | -0.075808  | 1.08E-05 | 0.01907318 | 1.71957686 | FALSE | 1316 |
| TEAD3_1318  | -0.0763197 | 9.42E-06 | 0.01661943 | 1.77938381 | FALSE | 1317 |
| CREB3L3_143 | -0.0764919 | 8.99E-06 | 0.01586362 | 1.79959774 | FALSE | 1318 |
| CREB3_153   | -0.0764919 | 8.99E-06 | 0.01586362 | 1.79959774 | FALSE | 1319 |
| CREB3L4_177 | -0.0764919 | 8.99E-06 | 0.01586362 | 1.79959774 | FALSE | 1320 |

|            |            |          |            |            |       |      |
|------------|------------|----------|------------|------------|-------|------|
| E2F8_453   | -0.0766571 | 8.60E-06 | 0.01516972 | 1.81902241 | FALSE | 1321 |
| SOX2_1253  | -0.0772703 | 7.28E-06 | 0.01283892 | 1.89147148 | FALSE | 1322 |
| SOX10_1212 | -0.0774318 | 6.96E-06 | 0.01228438 | 1.91064673 | FALSE | 1323 |
| TEAD1_1320 | -0.0780868 | 5.82E-06 | 0.01026152 | 1.98878816 | FALSE | 1324 |
| THRB_1069  | -0.0790929 | 4.40E-06 | 0.00776232 | 2.11000856 | FALSE | 1325 |
| HHEX_751   | -0.0792086 | 4.26E-06 | 0.0075155  | 2.12404235 | FALSE | 1326 |
| HES5_133   | -0.0792435 | 4.22E-06 | 0.00744268 | 2.12827046 | FALSE | 1327 |
| RXRG_1059  | -0.0794103 | 4.03E-06 | 0.00710326 | 2.14854232 | FALSE | 1328 |
| PAX3_902   | -0.0809565 | 2.60E-06 | 0.0045881  | 2.33836666 | FALSE | 1329 |
| MXI1_67    | -0.0821003 | 1.87E-06 | 0.00330373 | 2.48099508 | FALSE | 1330 |
| PAX8_1129  | -0.0824344 | 1.70E-06 | 0.00299911 | 2.52300692 | FALSE | 1331 |
| YY2_399    | -0.0827743 | 1.54E-06 | 0.00271693 | 2.56592128 | FALSE | 1332 |
| ZFP42_1577 | -0.0827743 | 1.54E-06 | 0.00271693 | 2.56592128 | FALSE | 1333 |
| FOSL2_144  | -0.0833609 | 1.30E-06 | 0.00228891 | 2.64037089 | FALSE | 1334 |
| ZNF143_327 | -0.0834386 | 1.27E-06 | 0.00223734 | 2.65026786 | FALSE | 1335 |
| MITF_126   | -0.0837271 | 1.17E-06 | 0.00205548 | 2.68708642 | FALSE | 1336 |
| CREB1_162  | -0.0840674 | 1.05E-06 | 0.00185913 | 2.73068948 | FALSE | 1337 |
| VDR_1024   | -0.0841415 | 1.03E-06 | 0.00181887 | 2.74019742 | FALSE | 1338 |
| MLXIPL_31  | -0.0846503 | 8.87E-07 | 0.00156406 | 2.80574603 | FALSE | 1339 |
| ZNF148_317 | -0.0860295 | 5.86E-07 | 0.00103445 | 2.98528881 | FALSE | 1340 |
| PPARG_1050 | -0.086848  | 4.57E-07 | 0.00080698 | 3.09313946 | FALSE | 1341 |
| TBX2_1291  | -0.0869158 | 4.48E-07 | 0.00079045 | 3.10212829 | FALSE | 1342 |
| BACH2_156  | -0.0870439 | 4.31E-07 | 0.00076014 | 3.11910876 | FALSE | 1343 |
| GBX2_792   | -0.0870799 | 4.26E-07 | 0.00075182 | 3.12388393 | FALSE | 1344 |
| SOX9_1227  | -0.0870979 | 4.24E-07 | 0.00074771 | 3.12626765 | FALSE | 1345 |
| BHLHE40_80 | -0.0871088 | 4.22E-07 | 0.00074523 | 3.12771147 | FALSE | 1346 |
| SOX18_1264 | -0.0871659 | 4.15E-07 | 0.00073232 | 3.1353013  | FALSE | 1347 |

|             |            |          |            |            |       |      |
|-------------|------------|----------|------------|------------|-------|------|
| ATF3_192    | -0.0873722 | 3.90E-07 | 0.0006875  | 3.16272872 | FALSE | 1348 |
| FEZF1_295   | -0.0881735 | 3.05E-07 | 0.0005372  | 3.26986144 | FALSE | 1349 |
| FEZF2_307   | -0.0881735 | 3.05E-07 | 0.0005372  | 3.26986144 | FALSE | 1350 |
| JUND_172    | -0.0882643 | 2.96E-07 | 0.00052233 | 3.28205914 | FALSE | 1351 |
| RARB_1012   | -0.0887803 | 2.52E-07 | 0.00044504 | 3.35160279 | FALSE | 1352 |
| HOXC13_695  | -0.0888744 | 2.45E-07 | 0.00043218 | 3.36433125 | FALSE | 1353 |
| PAX2_894    | -0.0890735 | 2.30E-07 | 0.00040616 | 3.39130121 | FALSE | 1354 |
| HOXB13_755  | -0.0891099 | 2.28E-07 | 0.00040158 | 3.39623061 | FALSE | 1355 |
| HEY2_83     | -0.0893294 | 2.13E-07 | 0.00037494 | 3.4260384  | FALSE | 1356 |
| ESR1_1017   | -0.0905586 | 1.44E-07 | 0.00025454 | 3.59424519 | FALSE | 1357 |
| CUX1_416    | -0.0907114 | 1.37E-07 | 0.00024249 | 3.61531329 | FALSE | 1358 |
| CUX1_418    | -0.0908067 | 1.33E-07 | 0.00023525 | 3.62846405 | FALSE | 1359 |
| HEY2_84     | -0.0909202 | 1.29E-07 | 0.00022691 | 3.64415187 | FALSE | 1360 |
| ZNF219_324  | -0.0913982 | 1.10E-07 | 0.0001948  | 3.71040476 | FALSE | 1361 |
| SOX7_1248   | -0.0914091 | 1.10E-07 | 0.00019412 | 3.71191903 | FALSE | 1362 |
| RARA_1049   | -0.0915637 | 1.05E-07 | 0.00018474 | 3.73342814 | FALSE | 1363 |
| NR1D2_1549  | -0.0916731 | 1.01E-07 | 0.00017838 | 3.7486633  | FALSE | 1364 |
| PTF1A_104   | -0.0922023 | 8.53E-08 | 0.00015045 | 3.82261262 | FALSE | 1365 |
| TP63_1121   | -0.0922722 | 8.34E-08 | 0.00014709 | 3.83240246 | FALSE | 1366 |
| MNX1_714    | -0.0923054 | 8.25E-08 | 0.00014552 | 3.8370671  | FALSE | 1367 |
| MLXIPL_30   | -0.092394  | 8.02E-08 | 0.00014142 | 3.84950398 | FALSE | 1368 |
| NFATC1_1151 | -0.0924297 | 7.92E-08 | 0.00013979 | 3.85451305 | FALSE | 1369 |
| POU2F1_915  | -0.0927625 | 7.11E-08 | 0.00012551 | 3.90133675 | FALSE | 1370 |
| BHLHE41_71  | -0.092785  | 7.06E-08 | 0.00012459 | 3.90450005 | FALSE | 1371 |
| TFEC_50     | -0.0927954 | 7.04E-08 | 0.00012417 | 3.90596873 | FALSE | 1372 |
| TEAD3_1316  | -0.0933157 | 5.94E-08 | 0.00010483 | 3.97953222 | FALSE | 1373 |
| MEF2A_977   | -0.0942122 | 4.43E-08 | 7.81E-05   | 4.10718118 | FALSE | 1374 |

|             |            |          |          |            |       |      |
|-------------|------------|----------|----------|------------|-------|------|
| PPARG_1053  | -0.0942495 | 4.38E-08 | 7.72E-05 | 4.11251851 | FALSE | 1375 |
| CLOCK_82    | -0.0942777 | 4.33E-08 | 7.65E-05 | 4.11655708 | FALSE | 1376 |
| ENO1_1329   | -0.0944045 | 4.16E-08 | 7.33E-05 | 4.13471902 | FALSE | 1377 |
| FERD3L_89   | -0.0944136 | 4.14E-08 | 7.31E-05 | 4.13602474 | FALSE | 1378 |
| BACH1_183   | -0.0944181 | 4.14E-08 | 7.30E-05 | 4.13667308 | FALSE | 1379 |
| PAX4_898    | -0.0945202 | 4.00E-08 | 7.06E-05 | 4.15131338 | FALSE | 1380 |
| HOXA2_639   | -0.0954715 | 2.92E-08 | 5.15E-05 | 4.28848897 | FALSE | 1381 |
| HOXD4_795   | -0.0961015 | 2.36E-08 | 4.17E-05 | 4.38005427 | FALSE | 1382 |
| HOXA4_1739  | -0.0961015 | 2.36E-08 | 4.17E-05 | 4.38005427 | FALSE | 1383 |
| JUND_171    | -0.0961386 | 2.33E-08 | 4.12E-05 | 4.38546224 | FALSE | 1384 |
| JUN_206     | -0.0961506 | 2.32E-08 | 4.10E-05 | 4.38721098 | FALSE | 1385 |
| NR3C2_1073  | -0.0964678 | 2.09E-08 | 3.68E-05 | 4.43356666 | FALSE | 1386 |
| JUN_208     | -0.0966939 | 1.94E-08 | 3.41E-05 | 4.46668884 | FALSE | 1387 |
| HOXD9_707   | -0.0978205 | 1.32E-08 | 2.33E-05 | 4.63285954 | FALSE | 1388 |
| SMARCC1_998 | -0.0979519 | 1.26E-08 | 2.23E-05 | 4.65235379 | FALSE | 1389 |
| FOS_198     | -0.0985945 | 1.01E-08 | 1.79E-05 | 4.74809526 | FALSE | 1390 |
| HIC2_335    | -0.0986232 | 1.00E-08 | 1.77E-05 | 4.75237976 | FALSE | 1391 |
| HOXC13_694  | -0.0987123 | 9.72E-09 | 1.72E-05 | 4.76570531 | FALSE | 1392 |
| HBP1_1215   | -0.0991748 | 8.29E-09 | 1.46E-05 | 4.83506276 | FALSE | 1393 |
| IRF5_959    | -0.1000331 | 6.15E-09 | 1.08E-05 | 4.96462037 | FALSE | 1394 |
| RARA_1048   | -0.1004496 | 5.32E-09 | 9.38E-06 | 5.02786955 | FALSE | 1395 |
| AR_1083     | -0.1008361 | 4.64E-09 | 8.19E-06 | 5.08679484 | FALSE | 1396 |
| HIVP2_236   | -0.1018585 | 3.23E-09 | 5.71E-06 | 5.2437216  | FALSE | 1397 |
| HIVP3_1364  | -0.1018585 | 3.23E-09 | 5.71E-06 | 5.2437216  | FALSE | 1398 |
| THRB_1070   | -0.1019516 | 3.13E-09 | 5.52E-06 | 5.25808672 | FALSE | 1399 |
| FOSB_168    | -0.1021451 | 2.92E-09 | 5.15E-06 | 5.28798061 | FALSE | 1400 |
| ARNT_87     | -0.1022674 | 2.80E-09 | 4.93E-06 | 5.30690961 | FALSE | 1401 |

|             |            |          |          |            |       |      |
|-------------|------------|----------|----------|------------|-------|------|
| NHLH1_108   | -0.1025366 | 2.54E-09 | 4.48E-06 | 5.34864746 | FALSE | 1402 |
| LYL1_1347   | -0.1025366 | 2.54E-09 | 4.48E-06 | 5.34864746 | FALSE | 1403 |
| HEYL_98     | -0.1033372 | 1.91E-09 | 3.36E-06 | 5.47340013 | FALSE | 1404 |
| CUX1_417    | -0.104456  | 1.27E-09 | 2.24E-06 | 5.64931623 | FALSE | 1405 |
| PAX2_892    | -0.1055009 | 8.67E-10 | 1.53E-06 | 5.8152808  | FALSE | 1406 |
| SOX15_1233  | -0.1059927 | 7.24E-10 | 1.28E-06 | 5.89395237 | FALSE | 1407 |
| ZNF524_343  | -0.106667  | 5.64E-10 | 9.94E-07 | 6.00240699 | FALSE | 1408 |
| USF1_92     | -0.1068144 | 5.34E-10 | 9.41E-07 | 6.02619839 | FALSE | 1409 |
| NFATC1_1154 | -0.106825  | 5.32E-10 | 9.38E-07 | 6.0279084  | FALSE | 1410 |
| NR1I2_1064  | -0.1074279 | 4.25E-10 | 7.49E-07 | 6.12558287 | FALSE | 1411 |
| FOSL1_205   | -0.1074638 | 4.19E-10 | 7.39E-07 | 6.13141561 | FALSE | 1412 |
| SREBF2_135  | -0.1081802 | 3.20E-10 | 5.65E-07 | 6.24820797 | FALSE | 1413 |
| XBP1_150    | -0.1082613 | 3.10E-10 | 5.48E-07 | 6.26147858 | FALSE | 1414 |
| SOX9_1226   | -0.1085172 | 2.82E-10 | 4.97E-07 | 6.3034236  | FALSE | 1415 |
| RAX_722     | -0.1094133 | 2.01E-10 | 3.54E-07 | 6.45103044 | FALSE | 1416 |
| HOXC8_618   | -0.1097244 | 1.78E-10 | 3.14E-07 | 6.50254844 | FALSE | 1417 |
| MAX_29      | -0.1117421 | 8.19E-11 | 1.44E-07 | 6.84020166 | FALSE | 1418 |
| ZBTB3_382   | -0.1117846 | 8.06E-11 | 1.42E-07 | 6.8473696  | FALSE | 1419 |
| HOXD10_708  | -0.1120398 | 7.29E-11 | 1.29E-07 | 6.89053036 | FALSE | 1420 |
| AR_1084     | -0.1122533 | 6.71E-11 | 1.18E-07 | 6.926705   | FALSE | 1421 |
| ATF6B_196   | -0.1128268 | 5.36E-11 | 9.46E-08 | 7.02420132 | FALSE | 1422 |
| ATF6B_220   | -0.1128268 | 5.36E-11 | 9.46E-08 | 7.02420132 | FALSE | 1423 |
| ATF6B_222   | -0.1128268 | 5.36E-11 | 9.46E-08 | 7.02420132 | FALSE | 1424 |
| ATF6B_223   | -0.1128268 | 5.36E-11 | 9.46E-08 | 7.02420132 | FALSE | 1425 |
| HOXB9_803   | -0.1132908 | 4.47E-11 | 7.88E-08 | 7.1034606  | FALSE | 1426 |
| SPZ1_1337   | -0.1134118 | 4.26E-11 | 7.51E-08 | 7.12417285 | FALSE | 1427 |
| HES7_118    | -0.1141951 | 3.12E-11 | 5.51E-08 | 7.25883655 | FALSE | 1428 |

|             |            |          |          |            |       |      |
|-------------|------------|----------|----------|------------|-------|------|
| SOX15_1232  | -0.1146665 | 2.59E-11 | 4.57E-08 | 7.34029674 | FALSE | 1429 |
| ELK3_471    | -0.1158061 | 1.64E-11 | 2.89E-08 | 7.53863026 | FALSE | 1430 |
| MLX_53      | -0.1171332 | 9.58E-12 | 1.69E-08 | 7.77203099 | FALSE | 1431 |
| ZBTB7B_310  | -0.117626  | 7.84E-12 | 1.38E-08 | 7.8593753  | FALSE | 1432 |
| MLXIP_113   | -0.1179472 | 6.87E-12 | 1.21E-08 | 7.91650657 | FALSE | 1433 |
| NFE2_166    | -0.1187726 | 4.89E-12 | 8.63E-09 | 8.06398707 | FALSE | 1434 |
| INSM1_353   | -0.1199524 | 3.00E-12 | 5.29E-09 | 8.27659239 | FALSE | 1435 |
| PAX6_889    | -0.1202899 | 2.60E-12 | 4.59E-09 | 8.33777954 | FALSE | 1436 |
| RORB_1744   | -0.1203809 | 2.51E-12 | 4.42E-09 | 8.35431396 | FALSE | 1437 |
| ATOH8_105   | -0.1209079 | 2.01E-12 | 3.55E-09 | 8.45028745 | FALSE | 1438 |
| PLAGL1_280  | -0.1212836 | 1.72E-12 | 3.03E-09 | 8.51896169 | FALSE | 1439 |
| DMRT2_433   | -0.1216362 | 1.48E-12 | 2.61E-09 | 8.58361202 | FALSE | 1440 |
| ATF3_190    | -0.1232194 | 7.54E-13 | 1.33E-09 | 8.87616521 | FALSE | 1441 |
| ZBTB7A_366  | -0.1238642 | 5.72E-13 | 1.01E-09 | 8.99640159 | FALSE | 1442 |
| NR2C2_1097  | -0.1238804 | 5.68E-13 | 1.00E-09 | 8.99941613 | FALSE | 1443 |
| PAX1_1130   | -0.1246217 | 4.12E-13 | 7.27E-10 | 9.13844189 | FALSE | 1444 |
| FOXO4_569   | -0.1255914 | 2.70E-13 | 4.77E-10 | 9.32152246 | FALSE | 1445 |
| TWIST1_69   | -0.1260777 | 2.19E-13 | 3.86E-10 | 9.41388142 | FALSE | 1446 |
| HMGA1_25    | -0.1269536 | 1.49E-13 | 2.62E-10 | 9.5811182  | FALSE | 1447 |
| ARNTL_78    | -0.1274072 | 1.22E-13 | 2.15E-10 | 9.66817929 | FALSE | 1448 |
| TBX20_1303  | -0.1275649 | 1.13E-13 | 2.00E-10 | 9.69852736 | FALSE | 1449 |
| ELK1_478    | -0.1277739 | 1.03E-13 | 1.82E-10 | 9.73879275 | FALSE | 1450 |
| POU3F4_937  | -0.1278247 | 1.01E-13 | 1.78E-10 | 9.74858228 | FALSE | 1451 |
| POU5F1_1531 | -0.1278247 | 1.01E-13 | 1.78E-10 | 9.74858228 | FALSE | 1452 |
| POU5F1_1535 | -0.1278247 | 1.01E-13 | 1.78E-10 | 9.74858228 | FALSE | 1453 |
| POU5F1_1539 | -0.1278247 | 1.01E-13 | 1.78E-10 | 9.74858228 | FALSE | 1454 |
| POU5F1_1543 | -0.1278247 | 1.01E-13 | 1.78E-10 | 9.74858228 | FALSE | 1455 |



|             |            |          |          |            |       |      |
|-------------|------------|----------|----------|------------|-------|------|
| POU5F1_1547 | -0.1278247 | 1.01E-13 | 1.78E-10 | 9.74858228 | FALSE | 1456 |
| POU5F1_1742 | -0.1278247 | 1.01E-13 | 1.78E-10 | 9.74858228 | FALSE | 1457 |
| JDP2_176    | -0.1283836 | 7.89E-14 | 1.39E-10 | 9.85663702 | FALSE | 1458 |
| NFIL3_193   | -0.1285014 | 7.48E-14 | 1.32E-10 | 9.87947411 | FALSE | 1459 |
| NR1I3_1060  | -0.1286495 | 7.00E-14 | 1.24E-10 | 9.90820397 | FALSE | 1460 |
| TP53_1126   | -0.1297586 | 4.26E-14 | 7.51E-11 | 10.1244671 | FALSE | 1461 |
| PAX2_893    | -0.1305402 | 2.99E-14 | 5.27E-11 | 10.2779968 | FALSE | 1462 |
| MXI1_65     | -0.1305682 | 2.95E-14 | 5.21E-11 | 10.2835204 | FALSE | 1463 |
| ATF3_191    | -0.1311643 | 2.25E-14 | 3.97E-11 | 10.4012475 | FALSE | 1464 |
| SOX1_1255   | -0.1315613 | 1.88E-14 | 3.31E-11 | 10.4799516 | FALSE | 1465 |
| RUNX3_1177  | -0.1319685 | 1.56E-14 | 2.75E-11 | 10.5609378 | FALSE | 1466 |
| TBX2_1290   | -0.1323221 | 1.32E-14 | 2.34E-11 | 10.6314561 | FALSE | 1467 |
| NR1I2_1063  | -0.133591  | 7.37E-15 | 1.30E-11 | 10.8860827 | FALSE | 1468 |
| ZBTB7A_367  | -0.1336362 | 7.22E-15 | 1.27E-11 | 10.8951924 | FALSE | 1469 |
| HSF1_952    | -0.1347513 | 4.29E-15 | 7.57E-12 | 11.1210527 | FALSE | 1470 |
| CREB1_163   | -0.1354866 | 3.04E-15 | 5.36E-12 | 11.2710265 | FALSE | 1471 |
| POU3F1_932  | -0.1361669 | 2.20E-15 | 3.89E-12 | 11.410506  | FALSE | 1472 |
| RBPJ_407    | -0.1363293 | 2.04E-15 | 3.60E-12 | 11.4439114 | FALSE | 1473 |
| ZIC2_238    | -0.1367595 | 1.66E-15 | 2.93E-12 | 11.5325851 | FALSE | 1474 |
| IRF6_953    | -0.1377619 | 1.03E-15 | 1.82E-12 | 11.7402901 | FALSE | 1475 |
| TBX15_1289  | -0.1378016 | 1.01E-15 | 1.78E-12 | 11.7485503 | FALSE | 1476 |
| TBX18_1762  | -0.1378016 | 1.01E-15 | 1.78E-12 | 11.7485503 | FALSE | 1477 |
| TBX22_1764  | -0.1378016 | 1.01E-15 | 1.78E-12 | 11.7485503 | FALSE | 1478 |
| TFE3_34     | -0.1380232 | 9.10E-16 | 1.60E-12 | 11.7946958 | FALSE | 1479 |
| ARNTL2_32   | -0.1394917 | 4.48E-16 | 7.90E-13 | 12.1023307 | FALSE | 1480 |
| BATF_182    | -0.1404698 | 2.78E-16 | 4.91E-13 | 12.3090499 | FALSE | 1481 |
| BACH1_186   | -0.1406937 | 2.49E-16 | 4.40E-13 | 12.3565815 | FALSE | 1482 |

|            |            |          |          |            |       |      |
|------------|------------|----------|----------|------------|-------|------|
| ZNF282_339 | -0.1414565 | 1.72E-16 | 3.03E-13 | 12.5190938 | FALSE | 1483 |
| BATF3_167  | -0.1416755 | 1.54E-16 | 2.72E-13 | 12.5659186 | FALSE | 1484 |
| HSF1_951   | -0.1418836 | 1.39E-16 | 2.45E-13 | 12.6104711 | FALSE | 1485 |
| DMRT1_430  | -0.1419117 | 1.37E-16 | 2.42E-13 | 12.6164843 | FALSE | 1486 |
| TBX5_1286  | -0.1419654 | 1.34E-16 | 2.35E-13 | 12.6280102 | FALSE | 1487 |
| VDR_1026   | -0.1423605 | 1.10E-16 | 1.94E-13 | 12.7128352 | FALSE | 1488 |
| SOX10_1211 | -0.1441641 | 4.47E-17 | 7.89E-14 | 13.1030955 | FALSE | 1489 |
| HOXD13_712 | -0.1450002 | 2.94E-17 | 5.18E-14 | 13.2857049 | FALSE | 1490 |
| STAT3_1277 | -0.1452493 | 2.59E-17 | 4.57E-14 | 13.3403118 | FALSE | 1491 |
| PBX4_1715  | -0.145319  | 2.50E-17 | 4.41E-14 | 13.3556046 | FALSE | 1492 |
| DDIT3_204  | -0.145327  | 2.49E-17 | 4.39E-14 | 13.357379  | FALSE | 1493 |
| ZEB1_232   | -0.1462258 | 1.58E-17 | 2.78E-14 | 13.5553145 | FALSE | 1494 |
| ELK1_479   | -0.1466684 | 1.26E-17 | 2.22E-14 | 13.6532509 | FALSE | 1495 |
| HEY1_102   | -0.1479004 | 6.70E-18 | 1.18E-14 | 13.927447  | FALSE | 1496 |
| NAIF1_974  | -0.1490527 | 3.69E-18 | 6.52E-15 | 14.1860223 | FALSE | 1497 |
| ZBTB7C_377 | -0.1496601 | 2.69E-18 | 4.75E-15 | 14.3231477 | FALSE | 1498 |
| STAT1_1266 | -0.1498809 | 2.40E-18 | 4.24E-15 | 14.3731267 | FALSE | 1499 |
| BACH1_184  | -0.1500033 | 2.25E-18 | 3.97E-15 | 14.4008767 | FALSE | 1500 |
| MYPOP_999  | -0.1500787 | 2.17E-18 | 3.82E-15 | 14.417987  | FALSE | 1501 |
| FEV_501    | -0.1505076 | 1.73E-18 | 3.05E-15 | 14.5154283 | FALSE | 1502 |
| EP300_1330 | -0.1507774 | 1.50E-18 | 2.65E-15 | 14.5768627 | FALSE | 1503 |
| HOXB8_685  | -0.1508248 | 1.46E-18 | 2.58E-15 | 14.5876699 | FALSE | 1504 |
| HOXA4_1726 | -0.1508248 | 1.46E-18 | 2.58E-15 | 14.5876699 | FALSE | 1505 |
| ETS1_480   | -0.1517998 | 8.77E-19 | 1.55E-15 | 14.8107302 | FALSE | 1506 |
| NR2F6_1080 | -0.1530397 | 4.54E-19 | 8.01E-16 | 15.0965084 | FALSE | 1507 |
| EPAS1_61   | -0.1534174 | 3.71E-19 | 6.55E-16 | 15.1840427 | FALSE | 1508 |
| TBX1_1306  | -0.1539454 | 2.80E-19 | 4.93E-16 | 15.3067621 | FALSE | 1509 |

|             |            |          |          |            |       |      |
|-------------|------------|----------|----------|------------|-------|------|
| DMRTA2_432  | -0.1541592 | 2.49E-19 | 4.40E-16 | 15.3565902 | FALSE | 1510 |
| VDR_1025    | -0.1547194 | 1.85E-19 | 3.25E-16 | 15.4874615 | FALSE | 1511 |
| TBX20_1304  | -0.154855  | 1.72E-19 | 3.03E-16 | 15.5192    | FALSE | 1512 |
| ARID3C_23   | -0.1549612 | 1.62E-19 | 2.86E-16 | 15.5440927 | FALSE | 1513 |
| MAFG_215    | -0.1558053 | 1.03E-19 | 1.81E-16 | 15.7425174 | FALSE | 1514 |
| HES2_36     | -0.1565144 | 6.97E-20 | 1.23E-16 | 15.9100654 | FALSE | 1515 |
| PAX5_1131   | -0.1577492 | 3.55E-20 | 6.26E-17 | 16.2037068 | FALSE | 1516 |
| ZBTB7B_311  | -0.1585088 | 2.33E-20 | 4.12E-17 | 16.3855084 | FALSE | 1517 |
| NR2F2_1101  | -0.1588551 | 1.93E-20 | 3.40E-17 | 16.4687003 | FALSE | 1518 |
| PBX1_840    | -0.159409  | 1.42E-20 | 2.50E-17 | 16.6021485 | FALSE | 1519 |
| PBX4_1716   | -0.159409  | 1.42E-20 | 2.50E-17 | 16.6021485 | FALSE | 1520 |
| MNT_37      | -0.1602045 | 9.10E-21 | 1.60E-17 | 16.794629  | FALSE | 1521 |
| NR2E1_1030  | -0.160291  | 8.67E-21 | 1.53E-17 | 16.815617  | FALSE | 1522 |
| TCF3_39     | -0.1604107 | 8.11E-21 | 1.43E-17 | 16.8446676 | FALSE | 1523 |
| NR3C1_1034  | -0.1605055 | 7.69E-21 | 1.36E-17 | 16.8677217 | FALSE | 1524 |
| SOX8_1200   | -0.1606573 | 7.06E-21 | 1.25E-17 | 16.9046302 | FALSE | 1525 |
| ONECUT3_420 | -0.1615543 | 4.27E-21 | 7.53E-18 | 17.1234745 | FALSE | 1526 |
| MYOD1_76    | -0.1618718 | 3.57E-21 | 6.29E-18 | 17.2012413 | FALSE | 1527 |
| RARG_1086   | -0.1620661 | 3.20E-21 | 5.64E-18 | 17.2489218 | FALSE | 1528 |
| MYF5_1554   | -0.1621553 | 3.04E-21 | 5.36E-18 | 17.2708201 | FALSE | 1529 |
| ZEB1_230    | -0.1628254 | 2.08E-21 | 3.67E-18 | 17.435783  | FALSE | 1530 |
| IKZF4_287   | -0.1631224 | 1.76E-21 | 3.10E-18 | 17.5091145 | FALSE | 1531 |
| IKZF1_383   | -0.1631224 | 1.76E-21 | 3.10E-18 | 17.5091145 | FALSE | 1532 |
| NR3C2_1071  | -0.1634345 | 1.47E-21 | 2.59E-18 | 17.5863206 | FALSE | 1533 |
| IKZF1_384   | -0.164727  | 7.01E-22 | 1.24E-18 | 17.9076933 | FALSE | 1534 |
| HOXC6_846   | -0.1654018 | 4.75E-22 | 8.38E-19 | 18.0765157 | FALSE | 1535 |
| HOXA4_1738  | -0.1654018 | 4.75E-22 | 8.38E-19 | 18.0765157 | FALSE | 1536 |

|             |            |          |          |            |       |      |
|-------------|------------|----------|----------|------------|-------|------|
| ZNF524_342  | -0.1657197 | 3.96E-22 | 6.98E-19 | 18.1563152 | FALSE | 1537 |
| TFE3_35     | -0.1657392 | 3.91E-22 | 6.90E-19 | 18.1612082 | FALSE | 1538 |
| BCL6B_313   | -0.1677074 | 1.24E-22 | 2.19E-19 | 18.658762  | FALSE | 1539 |
| PRDM1_240   | -0.16867   | 7.07E-23 | 1.25E-19 | 18.9043246 | FALSE | 1540 |
| RREB1_291   | -0.1688108 | 6.50E-23 | 1.15E-19 | 18.9403486 | FALSE | 1541 |
| USF1_91     | -0.1690521 | 5.64E-23 | 9.95E-20 | 19.0022114 | FALSE | 1542 |
| ZNF281_316  | -0.171245  | 1.53E-23 | 2.70E-20 | 19.5683949 | FALSE | 1543 |
| BATF_181    | -0.1728026 | 6.00E-24 | 1.06E-20 | 19.9751695 | FALSE | 1544 |
| EOMES_1298  | -0.1730727 | 5.10E-24 | 8.99E-21 | 20.0460751 | FALSE | 1545 |
| PITX2_773   | -0.1731474 | 4.87E-24 | 8.60E-21 | 20.0657247 | FALSE | 1546 |
| HOXA5_641   | -0.1731493 | 4.87E-24 | 8.59E-21 | 20.0662172 | FALSE | 1547 |
| HOXA4_1730  | -0.1731493 | 4.87E-24 | 8.59E-21 | 20.0662172 | FALSE | 1548 |
| USF2_49     | -0.1746915 | 1.90E-24 | 3.36E-21 | 20.4736103 | FALSE | 1549 |
| STAT6_1276  | -0.1762933 | 7.12E-25 | 1.26E-21 | 20.9007327 | FALSE | 1550 |
| ZNF76_242   | -0.1766321 | 5.78E-25 | 1.02E-21 | 20.9915791 | FALSE | 1551 |
| NHLH1_109   | -0.1767456 | 5.39E-25 | 9.50E-22 | 21.0220569 | FALSE | 1552 |
| LYL1_1348   | -0.1767456 | 5.39E-25 | 9.50E-22 | 21.0220569 | FALSE | 1553 |
| TBX15_1288  | -0.1777134 | 2.96E-25 | 5.21E-22 | 21.2827978 | FALSE | 1554 |
| TBX18_1761  | -0.1777134 | 2.96E-25 | 5.21E-22 | 21.2827978 | FALSE | 1555 |
| TBX22_1763  | -0.1777134 | 2.96E-25 | 5.21E-22 | 21.2827978 | FALSE | 1556 |
| PAX9_1136   | -0.1796916 | 8.57E-26 | 1.51E-22 | 21.8203829 | FALSE | 1557 |
| LEF1_1237   | -0.1797387 | 8.32E-26 | 1.47E-22 | 21.8332671 | FALSE | 1558 |
| CPEB1_1344  | -0.1800182 | 6.98E-26 | 1.23E-22 | 21.9097646 | FALSE | 1559 |
| JUN_207     | -0.181007  | 3.73E-26 | 6.59E-23 | 22.1813129 | FALSE | 1560 |
| TFEB_57     | -0.1810458 | 3.64E-26 | 6.43E-23 | 22.1920034 | FALSE | 1561 |
| ONECUT2_410 | -0.1817338 | 2.35E-26 | 4.15E-23 | 22.3819305 | FALSE | 1562 |
| NFATC1_1152 | -0.1824988 | 1.44E-26 | 2.55E-23 | 22.5939819 | FALSE | 1563 |

|             |            |          |          |            |       |      |
|-------------|------------|----------|----------|------------|-------|------|
| TBX3_1295   | -0.1828595 | 1.15E-26 | 2.02E-23 | 22.6943141 | FALSE | 1564 |
| HOXD8_813   | -0.1832548 | 8.89E-27 | 1.57E-23 | 22.8044797 | FALSE | 1565 |
| HOXA4_1735  | -0.1832548 | 8.89E-27 | 1.57E-23 | 22.8044797 | FALSE | 1566 |
| GLIS1_356   | -0.1836215 | 7.02E-27 | 1.24E-23 | 22.9069209 | FALSE | 1567 |
| NPAS2_106   | -0.183669  | 6.81E-27 | 1.20E-23 | 22.9201887 | FALSE | 1568 |
| LMO2_1334   | -0.1840024 | 5.49E-27 | 9.69E-24 | 23.0135516 | FALSE | 1569 |
| XBP1_149    | -0.1844514 | 4.11E-27 | 7.25E-24 | 23.139511  | FALSE | 1570 |
| FOXO6_584   | -0.1844695 | 4.06E-27 | 7.17E-24 | 23.1445996 | FALSE | 1571 |
| ZNF354C_363 | -0.1848688 | 3.14E-27 | 5.53E-24 | 23.2569313 | FALSE | 1572 |
| SREBF2_136  | -0.1872307 | 6.71E-28 | 1.18E-24 | 23.9265864 | FALSE | 1573 |
| JUND_174    | -0.1873423 | 6.24E-28 | 1.10E-24 | 23.9584531 | FALSE | 1574 |
| HOXA3_640   | -0.187661  | 5.06E-28 | 8.92E-25 | 24.0495507 | FALSE | 1575 |
| HOXA4_1731  | -0.187661  | 5.06E-28 | 8.92E-25 | 24.0495507 | FALSE | 1576 |
| JUND_173    | -0.1878397 | 4.50E-28 | 7.93E-25 | 24.1006972 | FALSE | 1577 |
| NROB1_1339  | -0.1879685 | 4.13E-28 | 7.28E-25 | 24.1376031 | FALSE | 1578 |
| SNAI2_237   | -0.1879896 | 4.07E-28 | 7.18E-25 | 24.1436354 | FALSE | 1579 |
| AHRR_33     | -0.1880803 | 3.84E-28 | 6.77E-25 | 24.1696634 | FALSE | 1580 |
| AHR_51      | -0.1880803 | 3.84E-28 | 6.77E-25 | 24.1696634 | FALSE | 1581 |
| MYCN_81     | -0.1886758 | 2.59E-28 | 4.56E-25 | 24.3407151 | FALSE | 1582 |
| KLF15_318   | -0.1887659 | 2.44E-28 | 4.30E-25 | 24.3666395 | FALSE | 1583 |
| TBX5_1287   | -0.1899354 | 1.12E-28 | 1.97E-25 | 24.7044407 | FALSE | 1584 |
| TBR1_1296   | -0.1900857 | 1.01E-28 | 1.79E-25 | 24.7480103 | FALSE | 1585 |
| PRDM1_241   | -0.1903209 | 8.65E-29 | 1.53E-25 | 24.8162755 | FALSE | 1586 |
| NR2F6_1079  | -0.1914926 | 3.94E-29 | 6.96E-26 | 25.1576625 | FALSE | 1587 |
| TBX1_1307   | -0.192671  | 1.78E-29 | 3.14E-26 | 25.5032375 | FALSE | 1588 |
| HOXB13_756  | -0.1930792 | 1.35E-29 | 2.38E-26 | 25.623468  | FALSE | 1589 |
| FLI1_490    | -0.1949708 | 3.71E-30 | 6.54E-27 | 26.1841424 | FALSE | 1590 |

|             |            |          |          |            |       |      |
|-------------|------------|----------|----------|------------|-------|------|
| PAX6_890    | -0.1955363 | 2.52E-30 | 4.44E-27 | 26.3528803 | FALSE | 1591 |
| GLIS2_292   | -0.1957232 | 2.21E-30 | 3.90E-27 | 26.4087714 | FALSE | 1592 |
| HOXB7_687   | -0.195898  | 1.96E-30 | 3.46E-27 | 26.4610851 | FALSE | 1593 |
| ONECUT1_419 | -0.1966703 | 1.15E-30 | 2.03E-27 | 26.6928484 | FALSE | 1594 |
| TBX4_1294   | -0.1967943 | 1.06E-30 | 1.86E-27 | 26.7301471 | FALSE | 1595 |
| HOXB6_662   | -0.197503  | 6.45E-31 | 1.14E-27 | 26.9438256 | FALSE | 1596 |
| MAX_27      | -0.1979545 | 4.71E-31 | 8.31E-28 | 27.080381  | FALSE | 1597 |
| TFAP2D_5    | -0.199097  | 2.12E-31 | 3.74E-28 | 27.4273913 | FALSE | 1598 |
| TBX2_1292   | -0.1994899 | 1.61E-31 | 2.84E-28 | 27.5472264 | FALSE | 1599 |
| GLIS3_272   | -0.1997005 | 1.39E-31 | 2.45E-28 | 27.6115483 | FALSE | 1600 |
| SNAI1_289   | -0.2006348 | 7.17E-32 | 1.27E-28 | 27.897844  | FALSE | 1601 |
| ZNF350_1346 | -0.2008224 | 6.28E-32 | 1.11E-28 | 27.9555078 | FALSE | 1602 |
| PLAG1_376   | -0.2010795 | 5.23E-32 | 9.23E-29 | 28.0346003 | FALSE | 1603 |
| SOX18_1263  | -0.2017058 | 3.36E-32 | 5.92E-29 | 28.2277864 | FALSE | 1604 |
| DBX2_839    | -0.2032679 | 1.10E-32 | 1.94E-29 | 28.7123837 | FALSE | 1605 |
| MGA_140     | -0.2044918 | 4.56E-33 | 8.04E-30 | 29.0948576 | FALSE | 1606 |
| ARID3A_18   | -0.2083497 | 2.73E-34 | 4.82E-31 | 30.3166312 | FALSE | 1607 |
| TBX4_1293   | -0.209213  | 1.45E-34 | 2.55E-31 | 30.5934237 | FALSE | 1608 |
| ZNF187_1578 | -0.2110504 | 3.69E-35 | 6.51E-32 | 31.1865961 | FALSE | 1609 |
| MGA_141     | -0.2141589 | 3.55E-36 | 6.27E-33 | 32.2028882 | FALSE | 1610 |
| TBX21_1284  | -0.2144301 | 2.89E-36 | 5.10E-33 | 32.2923451 | FALSE | 1611 |
| PURA_1342   | -0.217823  | 2.15E-37 | 3.79E-34 | 33.4215597 | FALSE | 1612 |
| ERG_496     | -0.2179486 | 1.95E-37 | 3.44E-34 | 33.4637256 | FALSE | 1613 |
| CDX1_671    | -0.2189887 | 8.70E-38 | 1.53E-34 | 33.8139552 | FALSE | 1614 |
| STAT3_1279  | -0.2204735 | 2.73E-38 | 4.82E-35 | 34.3170798 | FALSE | 1615 |
| ATOH1_1559  | -0.2212439 | 1.49E-38 | 2.63E-35 | 34.5796188 | FALSE | 1616 |
| ETS1_482    | -0.2216478 | 1.09E-38 | 1.92E-35 | 34.7176476 | FALSE | 1617 |

|                |            |          |          |            |       |      |
|----------------|------------|----------|----------|------------|-------|------|
| FIGLA_123      | -0.2235471 | 2.42E-39 | 4.26E-36 | 35.3703893 | FALSE | 1618 |
| FOXO3_527      | -0.2248227 | 8.74E-40 | 1.54E-36 | 35.8122115 | FALSE | 1619 |
| FLI1_491       | -0.2277558 | 8.22E-41 | 1.45E-37 | 36.8385841 | FALSE | 1620 |
| NFKB2_1141     | -0.2307512 | 7.11E-42 | 1.25E-38 | 37.9018565 | FALSE | 1621 |
| ZNF202_325     | -0.2322072 | 2.13E-42 | 3.77E-39 | 38.4242049 | FALSE | 1622 |
| IRF7_970       | -0.2336987 | 6.17E-43 | 1.09E-39 | 38.9630787 | FALSE | 1623 |
| ZIC5_302       | -0.2400916 | 2.74E-45 | 4.83E-42 | 41.3160098 | FALSE | 1624 |
| NR2F1_1096     | -0.2427976 | 2.63E-46 | 4.64E-43 | 42.3332359 | FALSE | 1625 |
| STAT4_1273     | -0.2462144 | 1.31E-47 | 2.31E-44 | 43.6358308 | FALSE | 1626 |
| MEF2D_984      | -0.2471664 | 5.64E-48 | 9.94E-45 | 44.0024035 | FALSE | 1627 |
| FOXO1_539      | -0.2474984 | 4.20E-48 | 7.40E-45 | 44.1306149 | FALSE | 1628 |
| CEBPA_226      | -0.2495274 | 6.84E-49 | 1.21E-45 | 44.9183722 | FALSE | 1629 |
| GABPA_494      | -0.2504632 | 2.95E-49 | 5.20E-46 | 45.2841013 | FALSE | 1630 |
| SPDEF_477      | -0.2529062 | 3.22E-50 | 5.67E-47 | 46.2461866 | FALSE | 1631 |
| MEF2A_979      | -0.2539634 | 1.22E-50 | 2.16E-47 | 46.6657971 | FALSE | 1632 |
| MZF1_255       | -0.254187  | 9.97E-51 | 1.76E-47 | 46.7547972 | FALSE | 1633 |
| TCF3_38        | -0.2554025 | 3.26E-51 | 5.75E-48 | 47.2401643 | FALSE | 1634 |
| HOXA9_626      | -0.2554951 | 2.99E-51 | 5.28E-48 | 47.2772323 | FALSE | 1635 |
| ETS_Family_506 | -0.2562717 | 1.46E-51 | 2.58E-48 | 47.5888315 | FALSE | 1636 |
| GLIS3_273      | -0.2583787 | 2.06E-52 | 3.63E-49 | 48.439655  | FALSE | 1637 |
| RORB_1747      | -0.2603097 | 3.37E-53 | 5.94E-50 | 49.2263183 | FALSE | 1638 |
| HSF1_950       | -0.2619952 | 6.84E-54 | 1.21E-50 | 49.9184239 | FALSE | 1639 |
| HSF2_944       | -0.2682732 | 1.63E-56 | 2.88E-53 | 52.5412145 | FALSE | 1640 |
| TBX1_1308      | -0.2694123 | 5.36E-57 | 9.45E-54 | 53.0247226 | FALSE | 1641 |
| ERG_495        | -0.2710507 | 1.07E-57 | 1.89E-54 | 53.7243096 | FALSE | 1642 |
| HOXA1_638      | -0.2720601 | 3.94E-58 | 6.95E-55 | 54.1577257 | FALSE | 1643 |
| EBF1_100       | -0.274316  | 4.17E-59 | 7.36E-56 | 55.1331245 | FALSE | 1644 |

|            |            |          |          |            |       |      |
|------------|------------|----------|----------|------------|-------|------|
| HSF4_946   | -0.2746185 | 3.08E-59 | 5.44E-56 | 55.2646106 | FALSE | 1645 |
| NR2E3_1007 | -0.2762555 | 5.95E-60 | 1.05E-56 | 55.9791383 | FALSE | 1646 |
| TBX10_1305 | -0.2769822 | 2.85E-60 | 5.04E-57 | 56.2979102 | FALSE | 1647 |
| ZEB1_231   | -0.2772157 | 2.25E-60 | 3.98E-57 | 56.4005279 | FALSE | 1648 |
| PAX5_1135  | -0.2786929 | 5.03E-61 | 8.87E-58 | 57.0521771 | FALSE | 1649 |
| SREBF1_42  | -0.2788973 | 4.08E-61 | 7.20E-58 | 57.1426456 | FALSE | 1650 |
| PAX4_899   | -0.2806752 | 6.62E-62 | 1.17E-58 | 57.932909  | FALSE | 1651 |
| IRF5_958   | -0.2845979 | 1.14E-63 | 2.01E-60 | 59.6972021 | FALSE | 1652 |
| HLF_155    | -0.287052  | 8.67E-65 | 1.53E-61 | 60.8155263 | FALSE | 1653 |
| ID3_63     | -0.2887756 | 1.40E-65 | 2.47E-62 | 61.6076788 | FALSE | 1654 |
| ID4_110    | -0.2887756 | 1.40E-65 | 2.47E-62 | 61.6076788 | FALSE | 1655 |
| RELB_1146  | -0.2928949 | 1.70E-67 | 3.00E-64 | 63.5235629 | FALSE | 1656 |
| PLAG1_375  | -0.2932798 | 1.12E-67 | 1.98E-64 | 63.7041968 | FALSE | 1657 |
| PBX2_848   | -0.2941232 | 4.49E-68 | 7.92E-65 | 64.101017  | FALSE | 1658 |
| PBX2_851   | -0.2941232 | 4.49E-68 | 7.92E-65 | 64.101017  | FALSE | 1659 |
| PBX2_858   | -0.2941232 | 4.49E-68 | 7.92E-65 | 64.101017  | FALSE | 1660 |
| PBX2_860   | -0.2941232 | 4.49E-68 | 7.92E-65 | 64.101017  | FALSE | 1661 |
| PBX2_874   | -0.2941232 | 4.49E-68 | 7.92E-65 | 64.101017  | FALSE | 1662 |
| PBX2_884   | -0.2941232 | 4.49E-68 | 7.92E-65 | 64.101017  | FALSE | 1663 |
| PBX2_885   | -0.2941232 | 4.49E-68 | 7.92E-65 | 64.101017  | FALSE | 1664 |
| PBX4_1718  | -0.2941232 | 4.49E-68 | 7.92E-65 | 64.101017  | FALSE | 1665 |
| MESP1_103  | -0.29663   | 2.92E-69 | 5.15E-66 | 65.2884789 | FALSE | 1666 |
| MESP2_129  | -0.29663   | 2.92E-69 | 5.15E-66 | 65.2884789 | FALSE | 1667 |
| DBP_151    | -0.2967042 | 2.69E-69 | 4.74E-66 | 65.3238149 | FALSE | 1668 |
| TEF_194    | -0.3027735 | 3.19E-72 | 5.63E-69 | 68.2492529 | FALSE | 1669 |
| REL_1156   | -0.3046245 | 3.96E-73 | 6.99E-70 | 69.1555243 | FALSE | 1670 |
| ZEB1_229   | -0.3077383 | 1.14E-74 | 2.02E-71 | 70.6950197 | FALSE | 1671 |



|              |            |           |          |            |       |      |
|--------------|------------|-----------|----------|------------|-------|------|
| ZBTB7A_365   | -0.3081771 | 6.92E-75  | 1.22E-71 | 70.913505  | FALSE | 1672 |
| HOXA4_1732   | -0.3086932 | 3.82E-75  | 6.75E-72 | 71.1709544 | FALSE | 1673 |
| TCF4_132     | -0.3137235 | 1.11E-77  | 1.96E-74 | 73.7072802 | FALSE | 1674 |
| ZEB1_228     | -0.3162705 | 5.53E-79  | 9.76E-76 | 75.010479  | FALSE | 1675 |
| PLAG1_374    | -0.3164154 | 4.66E-79  | 8.22E-76 | 75.0850044 | FALSE | 1676 |
| ZSCAN10_297  | -0.321162  | 1.60E-81  | 2.82E-78 | 77.5492626 | FALSE | 1677 |
| IRF1_955     | -0.3254687 | 8.50E-84  | 1.50E-80 | 79.8240928 | FALSE | 1678 |
| HIVEP1_254   | -0.3275462 | 6.59E-85  | 1.16E-81 | 80.9347831 | FALSE | 1679 |
| HIVEP3_1363  | -0.3275462 | 6.59E-85  | 1.16E-81 | 80.9347831 | FALSE | 1680 |
| ERF_469      | -0.3397848 | 1.25E-91  | 2.21E-88 | 87.6564291 | FALSE | 1681 |
| IRF4_962     | -0.3407106 | 3.77E-92  | 6.65E-89 | 88.1774284 | FALSE | 1682 |
| BORCS8_MEF2I | -0.3407363 | 3.64E-92  | 6.43E-89 | 88.1919004 | FALSE | 1683 |
| MEF2B_985    | -0.3407363 | 3.64E-92  | 6.43E-89 | 88.1919004 | FALSE | 1684 |
| GATA1_592    | -0.3426051 | 3.19E-93  | 5.63E-90 | 89.2491376 | FALSE | 1685 |
| IRF8_964     | -0.3436738 | 7.88E-94  | 1.39E-90 | 89.8570446 | FALSE | 1686 |
| TOPORS_1343  | -0.3463038 | 2.46E-95  | 4.33E-92 | 91.3631896 | FALSE | 1687 |
| MAZ_266      | -0.349706  | 2.63E-97  | 4.64E-94 | 93.3331876 | FALSE | 1688 |
| STAT1_1269   | -0.3513023 | 3.07E-98  | 5.42E-95 | 94.2659794 | FALSE | 1689 |
| RELA_1157    | -0.3515491 | 2.20E-98  | 3.88E-95 | 94.4106912 | FALSE | 1690 |
| MEF2A_978    | -0.3523512 | 7.44E-99  | 1.31E-95 | 94.8818296 | FALSE | 1691 |
| MEF2A_976    | -0.3530057 | 3.06E-99  | 5.40E-96 | 95.2672914 | FALSE | 1692 |
| NFKB1_1148   | -0.3530232 | 2.99E-99  | 5.28E-96 | 95.2776081 | FALSE | 1693 |
| ELF4_467     | -0.3542475 | 5.65E-100 | 9.97E-97 | 96.0012328 | FALSE | 1694 |
| NFKB2_1140   | -0.3570635 | 1.19E-101 | 2.10E-98 | 97.6776966 | FALSE | 1695 |
| ELK4_498     | -0.3577453 | 4.65E-102 | 8.20E-99 | 98.086203  | FALSE | 1696 |
| NFKB1_1147   | -0.3579598 | 3.46E-102 | 6.10E-99 | 98.2149191 | FALSE | 1697 |
| PBX4_1717    | -0.3587236 | 1.20E-102 | 2.12E-99 | 98.6741099 | FALSE | 1698 |

|            |            |           |           |            |       |      |
|------------|------------|-----------|-----------|------------|-------|------|
| HOXB1_689  | -0.3615492 | 2.34E-104 | 4.13E-101 | 100.383699 | FALSE | 1699 |
| MEF2C_980  | -0.3622836 | 8.37E-105 | 1.48E-101 | 100.830867 | FALSE | 1700 |
| IRF9_972   | -0.367916  | 2.84E-108 | 5.01E-105 | 104.299834 | FALSE | 1701 |
| NFKB1_1149 | -0.3684878 | 1.25E-108 | 2.21E-105 | 104.655919 | FALSE | 1702 |
| IRF7_969   | -0.3701417 | 1.16E-109 | 2.04E-106 | 105.68993  | FALSE | 1703 |
| IRF9_973   | -0.3768472 | 6.44E-114 | 1.14E-110 | 109.944801 | FALSE | 1704 |
| EBF1_101   | -0.3781836 | 8.88E-115 | 1.57E-111 | 110.804912 | FALSE | 1705 |
| ZNF263_234 | -0.3784443 | 6.03E-115 | 1.06E-111 | 110.973138 | FALSE | 1706 |
| IRF2_967   | -0.3826503 | 1.11E-117 | 1.95E-114 | 113.709098 | FALSE | 1707 |
| NFKB1_1150 | -0.3876916 | 5.15E-121 | 9.08E-118 | 117.041863 | FALSE | 1708 |
| ATF5_197   | -0.3974911 | 1.16E-127 | 2.04E-124 | 123.689772 | FALSE | 1709 |
| STAT1_1268 | -0.40151   | 1.87E-130 | 3.30E-127 | 126.481894 | FALSE | 1710 |
| IRF7_971   | -0.4032742 | 1.08E-131 | 1.91E-128 | 127.719835 | FALSE | 1711 |
| DBP_152    | -0.4037074 | 5.35E-132 | 9.44E-129 | 128.025017 | FALSE | 1712 |
| IRF2_966   | -0.4063756 | 6.90E-134 | 1.22E-130 | 129.914377 | FALSE | 1713 |
| ATF4_169   | -0.408064  | 4.31E-135 | 7.60E-132 | 131.118949 | FALSE | 1714 |
| IRF7_968   | -0.4149116 | 4.76E-140 | 8.40E-137 | 136.075969 | FALSE | 1715 |
| MZF1_256   | -0.4155388 | 1.65E-140 | 2.91E-137 | 136.53586  | FALSE | 1716 |
| ELK3_472   | -0.422216  | 1.82E-145 | 3.22E-142 | 141.492726 | FALSE | 1717 |
| ETV2_468   | -0.4330084 | 1.02E-153 | 1.80E-150 | 149.745177 | FALSE | 1718 |
| CEBPG_180  | -0.4370808 | 6.54E-157 | 1.15E-153 | 152.938126 | FALSE | 1719 |
| GFI1_315   | -0.443072  | 1.09E-161 | 1.93E-158 | 157.715531 | FALSE | 1720 |
| CEBPE_147  | -0.4440832 | 1.67E-162 | 2.94E-159 | 158.531378 | FALSE | 1721 |
| GFI1B_323  | -0.4452308 | 1.96E-163 | 3.46E-160 | 159.460585 | FALSE | 1722 |
| IRF5_960   | -0.4504885 | 9.76E-168 | 1.72E-164 | 163.763918 | FALSE | 1723 |
| CEBPG_179  | -0.4547136 | 2.99E-171 | 5.28E-168 | 167.27735  | FALSE | 1724 |
| HDX_781    | -0.4586524 | 1.43E-174 | 2.53E-171 | 170.597621 | FALSE | 1725 |

|            |            |           |           |            |       |      |
|------------|------------|-----------|-----------|------------|-------|------|
| CEBPE_146  | -0.4614513 | 5.89E-177 | 1.04E-173 | 172.983666 | FALSE | 1726 |
| ZNF683_359 | -0.4624995 | 7.42E-178 | 1.31E-174 | 173.88299  | FALSE | 1727 |
| EHF_483    | -0.4696236 | 4.72E-184 | 8.33E-181 | 180.07929  | FALSE | 1728 |
| CEBPA_224  | -0.4698235 | 3.15E-184 | 5.56E-181 | 180.255212 | FALSE | 1729 |
| ELF3_499   | -0.4740963 | 5.11E-188 | 9.01E-185 | 184.045134 | FALSE | 1730 |
| CEBPB_202  | -0.4769049 | 1.54E-190 | 2.72E-187 | 186.565876 | FALSE | 1731 |
| STAT6_1275 | -0.4801616 | 1.72E-193 | 3.03E-190 | 189.518376 | FALSE | 1732 |
| CEBPD_221  | -0.485385  | 2.71E-198 | 4.77E-195 | 194.32122  | FALSE | 1733 |
| ETV5_508   | -0.4856945 | 1.40E-198 | 2.46E-195 | 194.608413 | FALSE | 1734 |
| CEBPB_203  | -0.4913735 | 6.64E-204 | 1.17E-200 | 199.931058 | FALSE | 1735 |
| PRDM1_239  | -0.4949005 | 2.92E-207 | 5.15E-204 | 203.287803 | FALSE | 1736 |
| ELF1_474   | -0.5148774 | 4.91E-227 | 8.67E-224 | 223.062157 | FALSE | 1737 |
| IRF1_954   | -0.5296499 | 1.57E-242 | 2.78E-239 | 238.556729 | FALSE | 1738 |
| ETV7_464   | -0.5335598 | 9.24E-247 | 1.63E-243 | 242.787877 | FALSE | 1739 |
| IRF3_957   | -0.537577  | 3.63E-251 | 6.41E-248 | 247.193388 | FALSE | 1740 |
| IRF3_956   | -0.5378336 | 1.89E-251 | 3.34E-248 | 247.47681  | FALSE | 1741 |
| IRF4_961   | -0.5475881 | 2.08E-262 | 3.67E-259 | 258.435295 | FALSE | 1742 |
| ZNF263_235 | -0.5574808 | 6.73E-274 | 1.19E-270 | 269.925207 | FALSE | 1743 |
| STAT2_1281 | -0.5593574 | 4.02E-276 | 7.10E-273 | 272.148762 | FALSE | 1744 |
| FEV_502    | -0.5653786 | 2.36E-283 | 4.17E-280 | 279.380179 | FALSE | 1745 |
| ELF2_470   | -0.5661646 | 2.62E-284 | 4.62E-281 | 280.335148 | FALSE | 1746 |
| IRF8_965   | -0.5871678 | 0.00E-02  | 1.45E-307 | 306.837745 | FALSE | 1747 |
| ETS2_497   | -0.5881184 | 0.00E-02  | 0.00E+00  | 308.083593 | FALSE | 1748 |
| FLI1_493   | -0.5937902 | 0.00E-02  | 0.00E-02  | 315.603655 | FALSE | 1749 |
| ELF3_500   | -0.596998  | 0.00E-02  | 0.00E-02  | 319.758687 | FALSE | 1750 |
| IRF4_963   | -0.60152   | 0         | 0         | Inf        | FALSE | 1751 |
| FLI1_492   | -0.6023674 | 0         | 0         | Inf        | FALSE | 1752 |

|             |            |   |   |     |       |      |
|-------------|------------|---|---|-----|-------|------|
| ETV6_486    | -0.6077171 | 0 | 0 | Inf | FALSE | 1753 |
| ETV4_505    | -0.6134265 | 0 | 0 | Inf | FALSE | 1754 |
| EHF_484     | -0.6225789 | 0 | 0 | Inf | FALSE | 1755 |
| SPIB_489    | -0.6289684 | 0 | 0 | Inf | FALSE | 1756 |
| ETV6_487    | -0.6332109 | 0 | 0 | Inf | FALSE | 1757 |
| ELF5_485    | -0.6355077 | 0 | 0 | Inf | FALSE | 1758 |
| SPI1_466    | -0.6565681 | 0 | 0 | Inf | FALSE | 1759 |
| SPIC_503    | -0.6600125 | 0 | 0 | Inf | FALSE | 1760 |
| SPIB_488    | -0.6638048 | 0 | 0 | Inf | FALSE | 1761 |
| BCL11A_284  | -0.678904  | 0 | 0 | Inf | FALSE | 1762 |
| BCL11B_1365 | -0.678904  | 0 | 0 | Inf | FALSE | 1763 |
| SPI1_465    | -0.6881436 | 0 | 0 | Inf | FALSE | 1764 |

**Supplementary Table 11. Deletion sgRNA sequences.**

| sgRNA Name      | Sequence             |
|-----------------|----------------------|
| Enhancer Pair 1 |                      |
| sgRNA.1a        | UCCUUGAGGACAGACACCAC |
| sgRNA.1b        | GGAUCCAGGAUACCAGCGAG |
| Enhancer Pair 2 |                      |
| sgRNA.2a        | ACUCCAUGACCCAUAACUGA |
| sgRNA.2b        | UAGGGUACCCUCGUGCACCC |
| AAVS1 KO        | GGGGCCACUAGGGACAGGAU |

| Supplementary Table 12. Variant overlap in erythroid lineage accessible chromatin at known loci. |                                  |                                |           |                                                       |
|--------------------------------------------------------------------------------------------------|----------------------------------|--------------------------------|-----------|-------------------------------------------------------|
| BCL11A                                                                                           | ALL                              | AFR-EUR                        | AFR-THAI  | EUR-THAI                                              |
| Independent sentinel                                                                             | rs6709302                        | rs243017, rs1427407, rs7560588 | rs7599488 | rs9789627                                             |
| Sentinel in <sup>L</sup> accessible chromatin                                                    |                                  | rs1427407                      | rs7599488 |                                                       |
| Finemapped in <sup>L</sup> accessible chromatin                                                  | rs1427407                        |                                |           | rs10189857                                            |
| HBS1L-MYB                                                                                        | ALL                              | AFR-EUR                        | AFR-THAI  | EUR-THAI                                              |
| Independent sentinel                                                                             | rs6899500, rs13220662, rs6930223 | rs1547247, rs7744765           |           | rs9402657, rs2072827, rs1022491, rs7776054, rs1013891 |
| Sentinel in <sup>L</sup> accessible chromatin                                                    | rs13220662                       | rs7744765                      |           | rs2072827, rs1013891                                  |
| Finemapped in <sup>L</sup> accessible chromatin                                                  |                                  |                                |           |                                                       |

| Supplementary Table 13. Definitions of rare deletions in thai ancestry populations, coordinates are in hg38. |                                     |            |         |         |       |                                 |                                     |
|--------------------------------------------------------------------------------------------------------------|-------------------------------------|------------|---------|---------|-------|---------------------------------|-------------------------------------|
| main_name                                                                                                    | name                                | chromosome | start   | end     | hbvar | other_name                      | HGVS                                |
| HPFH-6                                                                                                       | HPFH-6                              | chr11      | 5172743 | 5252021 | 1048  | HPFH-6                          | NG_000007.3:g.45595_124872del79278  |
| SEA                                                                                                          | SEA                                 | chr11      | 5198001 | 5229446 |       |                                 |                                     |
| 3.48 kb Thai ( $\beta$ ) <sup>0</sup>                                                                        | 3.48kb deletion                     | chr11      | 5224000 | 5227000 | 982   | 3,485 bp deletion the Thai dele |                                     |
| Asian Indian inversion deletion G $\gamma$ (A $\gamma$ $\delta$ )                                            | Asian Indian Del Inv B              | chr11      | 5201475 | 5225451 | 1038  | Indian Ggamma(Agammadelta       |                                     |
| Siriraj I G $\gamma$ (A $\gamma$ $\delta$ ) <sup>0</sup> -thalassaemia                                       | Siriraj I                           | chr11      | 5131872 | 5245109 |       |                                 |                                     |
| Filipino-type $\beta$ <sup>0</sup> -thalassemia                                                              | Filipino deletion beta <sup>0</sup> | chr11      | 5112882 | 5231358 | 989   | ~45 kb deletion                 | NG_000007.3:g.66258_184734del118477 |
| Chinese Ggamma(Agammadeltabeta) <sup>0</sup>                                                                 | Chinese HPFH                        | chr11      | 5169918 | 5248821 | 1046  | Chinese Ggamn                   | NG_000007.3:g.48795_127698del78904  |
| Thai ( $\delta$ ) <sup>0</sup> -thal                                                                         | Thai (Vietnamese) delta-beta        | chr11      | 5220623 | 5233232 | 1034  | Thai (deltabeta,                | NG_000007.3:g.64384_76993del12610   |
| Neg 10 del                                                                                                   | Neg10-1                             | chr11      | 5248760 | 5253699 |       | eg. F0009                       |                                     |
|                                                                                                              | Neg10-2                             | chr11      | 5225571 | 5248370 |       | e.g. F0001, INVERSION           |                                     |

**Supplementary Table 14. Enhancer deletion qPCR primers.**

| qPCR Primer Name               | Sequence                            |
|--------------------------------|-------------------------------------|
| BACH2_Enhancer_Deletion_qPCR_1 | CCACATCTGTTAATTGAGCACAACACAAAG      |
| BACH2_Enhancer_Deletion_qPCR_2 | GAGTAGTTACAGCCATTTTCAGACACTTCTG     |
| BACH2_Enhancer_Deletion_qPCR_3 | CAAAGTTGATTATTCTATACGATTCTGAGGCACAG |
| BACH2_Enhancer_Deletion_qPCR_4 | GTGTGTGTGTTGAGACCAGTCATCTATTTAAG    |
| BACH2_Enhancer_Deletion_qPCR_5 | GCTTAAACAGGTTGATCATAGCACATTTCC      |



**Supplementary Table 15. Gene expression qPCR primers.**

| qPCR Primer Name | Sequence                 |
|------------------|--------------------------|
| ACTB_qPCR_F      | AGAAAATCTGGCACCACACC     |
| ACTB_qPCR_R      | GGGGTGTGAAGGTCTCAAA      |
| BACH2_qPCR_F     | TGATTTGGTGGTCAGCTTGC     |
| BACH2_qPCR_R     | TCGCGGATGTTTTCTCTGCT     |
| HBB_qPCR_F       | GATGGCCTGGCTCACCTG       |
| HBB_qPCR_R       | TGCCCAGGAGCCTGAAGT       |
| HBG1/2_F         | TTTGCCCAGCTGAGTGAAC      |
| HBG1/2_R         | CACATTTCCCAGGAGCTTGAAG   |
| MDN1_F           | AGACTGGTGGCTTCGCTGGTAT   |
| MDN1_R           | ATCTGCTCCCTGATGGCAAGGA   |
| CASP8AP2_F       | CTCTGAATAGTCCAGTGAGACCT  |
| CASP8AP2_R       | CTGACTCTTAGAGGTAGAATGAGC |
| MAP3K7_F         | CAGAGCAACTCTGCCACCAGTA   |
| MAP3K7_R         | CATTTGTGGCAGGAACTTGCTCC  |
